# Supplementary material
Source: PubMed Central journal article supplement (PMC4119286)
Supplement: mmc1.pdf [file mmc1.pdf]

## Supplementary Material

### CHARMM All-Atom Additive Force Field for Sphingomyelin: Elucidation of Hydrogen Bonding and of Positive Curvature

Richard M. Venable,<sup>1</sup> Alex Sodt,<sup>1</sup> Brent Rogaski,<sup>2</sup> Huan Rui,<sup>3</sup> Elizabeth Hatcher,<sup>4</sup>  
Alexander D. MacKerell, Jr.,<sup>4,\*</sup> Richard W. Pastor,<sup>1,\*</sup> and Jeffery B. Klauda<sup>2,\*</sup>

*1) Laboratory of Computational Biology, National Heart, Lung, and Blood Institute, National Institutes of Health, Bethesda, MD 20892*

*2) Department of Chemical and Biomolecular Engineering, University of Maryland, College Park, MD 20742*

*3) Center for Bioinformatics and Department of Molecular Biosciences, The University of Kansas, 2030 Becker Drive, Lawrence KS 66047, USA*

*4) Department of Pharmaceutical Sciences, School of Pharmacy, University of Maryland, 20 Penn Street, Baltimore, Maryland 21201*

\*Corresponding authors: [alex@outerbanks.umaryland.edu](mailto:alex@outerbanks.umaryland.edu), [pastorr@nhlbi.nih.gov](mailto:pastorr@nhlbi.nih.gov),  
[jbklauda@umd.edu](mailto:jbklauda@umd.edu)

**Table S1.** CHelpG charges at the MP2/cc-pVDZ model chemistry for conformations C3 through C6 of the CER6 model for SM. Atom names correspond to Figure 2. Also shown are the charges used in unoptimized CHARMM36 (C36u) and charge optimized C36.

|    | C3     | C4     | C5     | C6     | C36u  | C36   |
|----|--------|--------|--------|--------|-------|-------|
| C3 | +0.601 | +0.490 | +0.509 | +0.421 | +0.05 | +0.50 |
| H3 | -0.090 | +0.001 | -0.087 | -0.035 | +0.09 | -0.11 |
| O3 | -0.744 | -0.655 | -0.693 | -0.646 | -0.45 | -0.69 |
| HO | +0.429 | +0.348 | +0.424 | +0.348 | +0.31 | +0.30 |
| C2 | +0.220 | +0.140 | +0.157 | +0.284 | +0.07 | +0.30 |
| H2 | -0.002 | +0.044 | +0.013 | +0.048 | +0.09 | +0.05 |
| N  | -0.749 | -0.801 | -0.776 | -0.754 | -0.47 | -0.70 |
| H  | +0.334 | +0.443 | +0.351 | +0.351 | +0.31 | +0.35 |
| CF | +0.675 | +0.743 | +0.738 | +0.702 | +0.51 | +0.55 |
| OF | -0.515 | -0.592 | -0.556 | -0.540 | -0.51 | -0.60 |

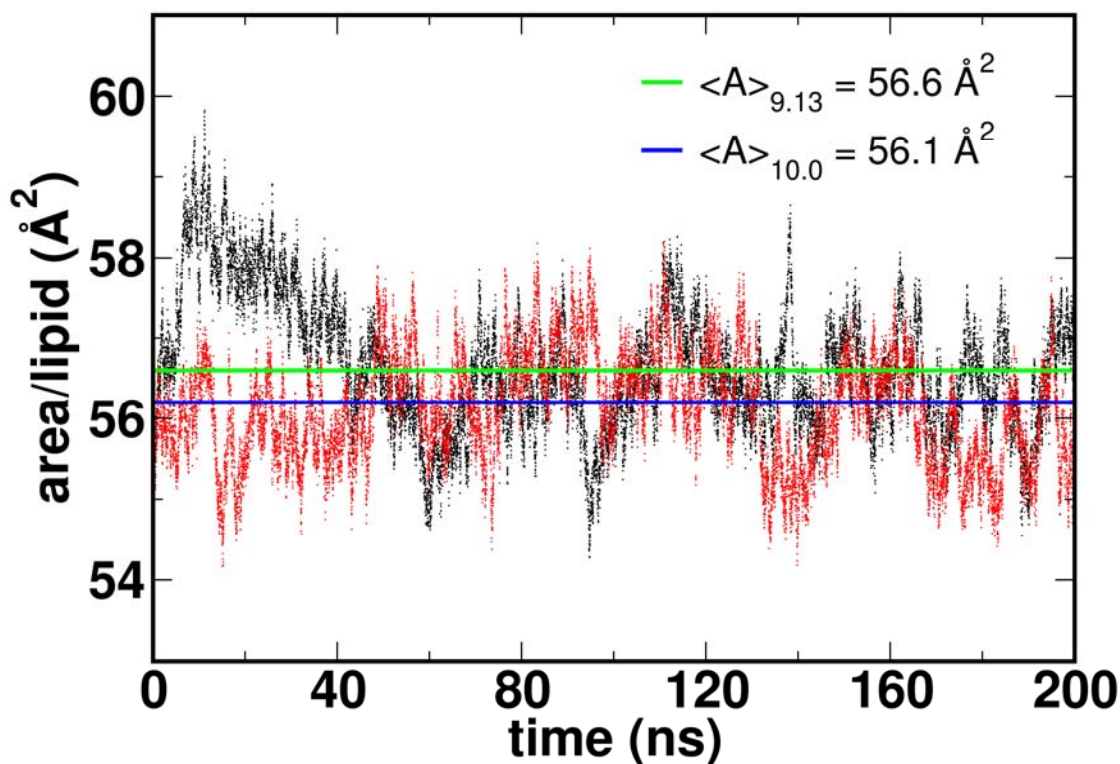

**Figure S1.** Effect of Anton short range nonbonded interaction cutoff on the area/lipid,  $A$ ; the blue line is the average for the red time series ( $R_{\text{cut}} = 10.0 \text{ \AA}$ ), and green is the average for the black time series ( $R_{\text{cut}} = 9.13 \text{ \AA}$ ).

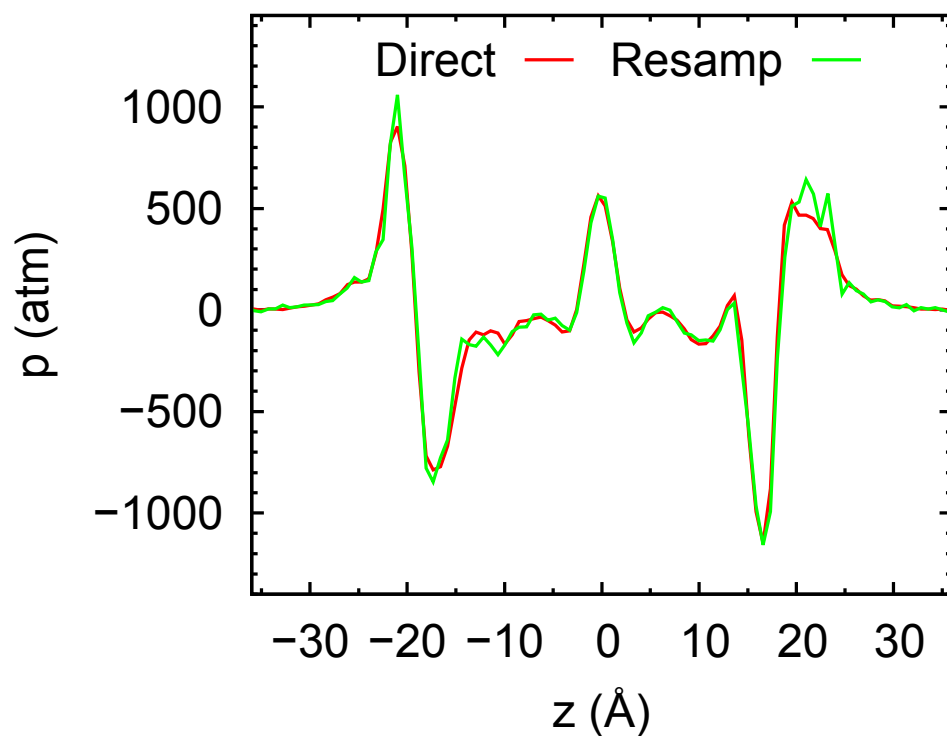

**Figure S2.** Comparison of pressure profiles from a 100 ns PSM simulation with full sampling (Direct) or via the 10% resampling (Resamp) of 100 ps intervals spaced 1 ns apart, using restart files from the fully sampled simulation. The  $\bar{F}'(0)$  values and standard errors obtained are  $-0.190 \pm 0.009$  and  $-0.192 \pm 0.004$  for the fully sampled and resampled data, respectively.

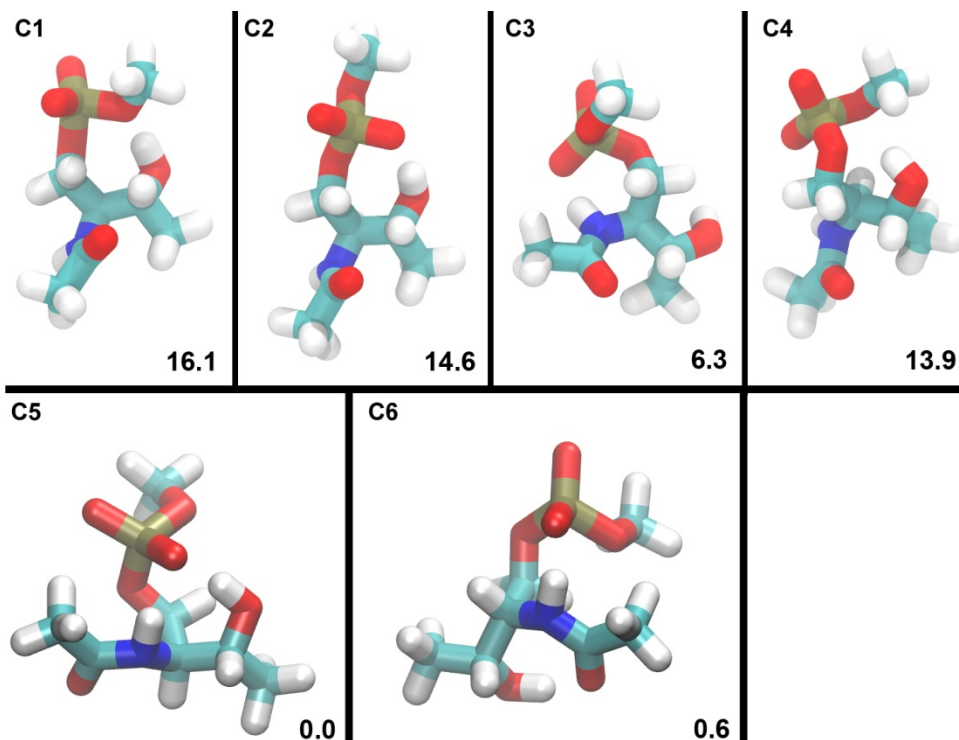

**Figure S3.** Conformations of local minima calculated at the MP2/cc-pVDZ model chemistry for the CER6 molecule. The energies relative to the global minima are shown in the bottom right corner in kcal/mol.

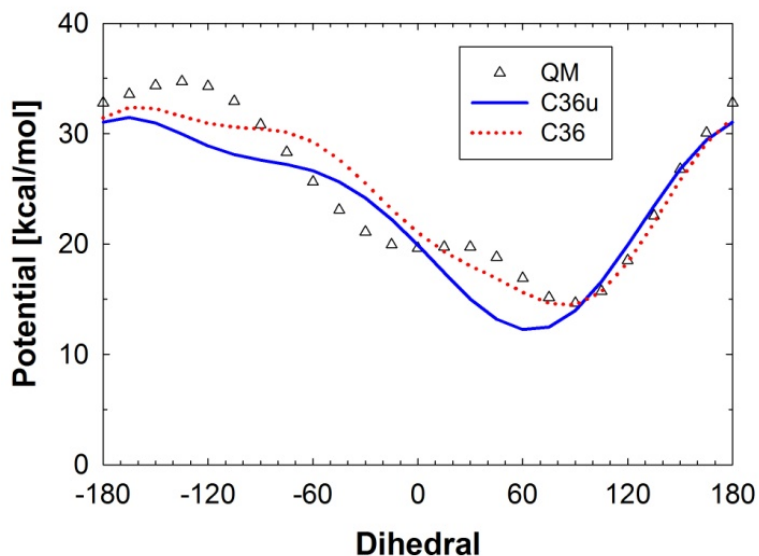

**Figure S4.** The torsional energy of the tOH (H-O3-C3-C2) torsion of CER6 from QM (MP2/cc-pVDZ) and C36u and C36 relative to the minima of t4. Constraints were included to maintain the C2 conformation in Figure S3.

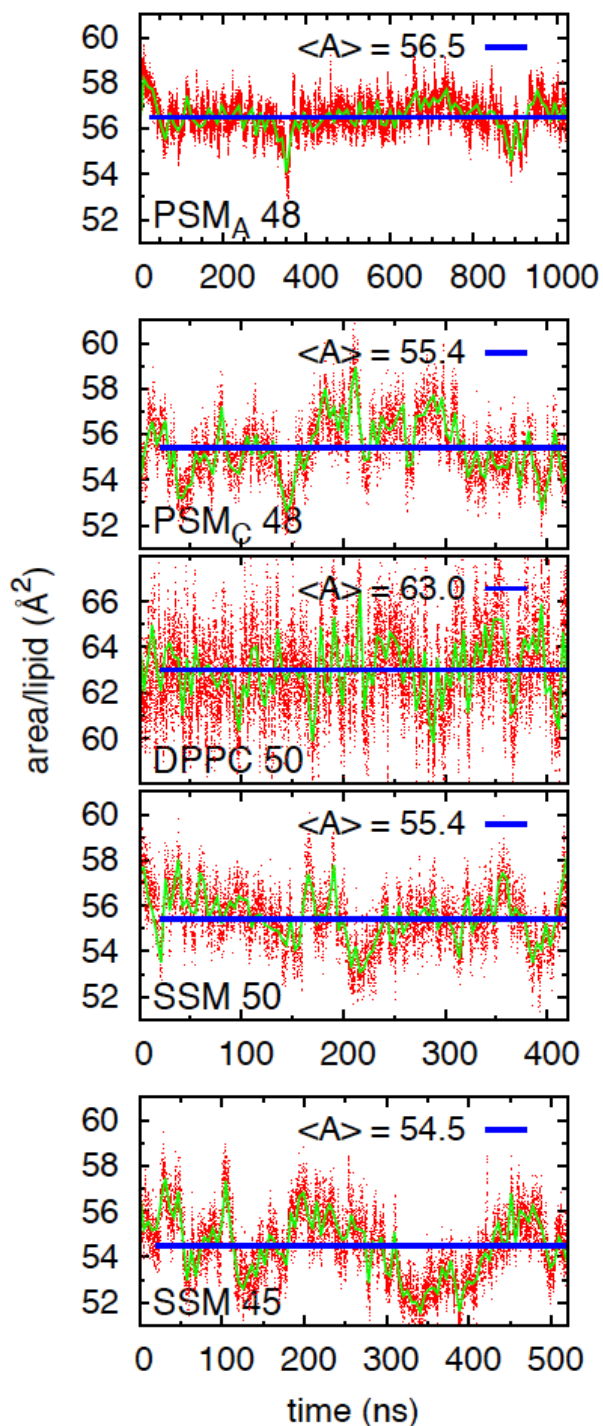

**Figure S5.** Area/lipid time series from CHARMM and Anton (PSM<sub>A</sub>) simulations; red dots are snapshot values, the green line is a smoothed local average, and the heavy blue line is the average over the interval indicated by the line endpoints.

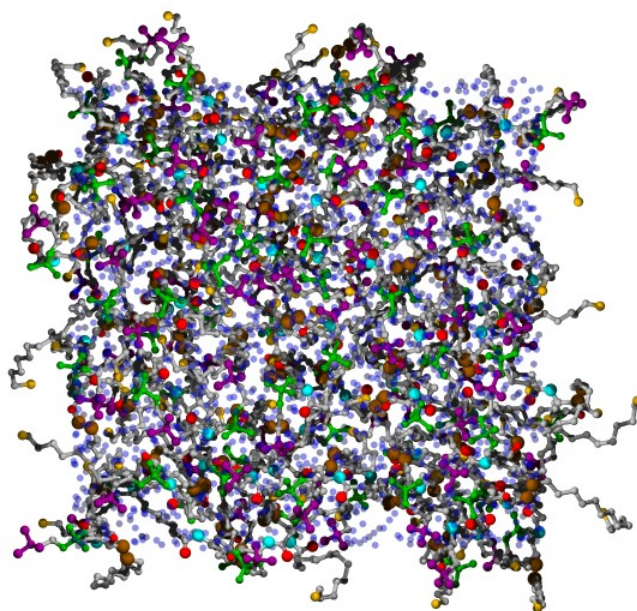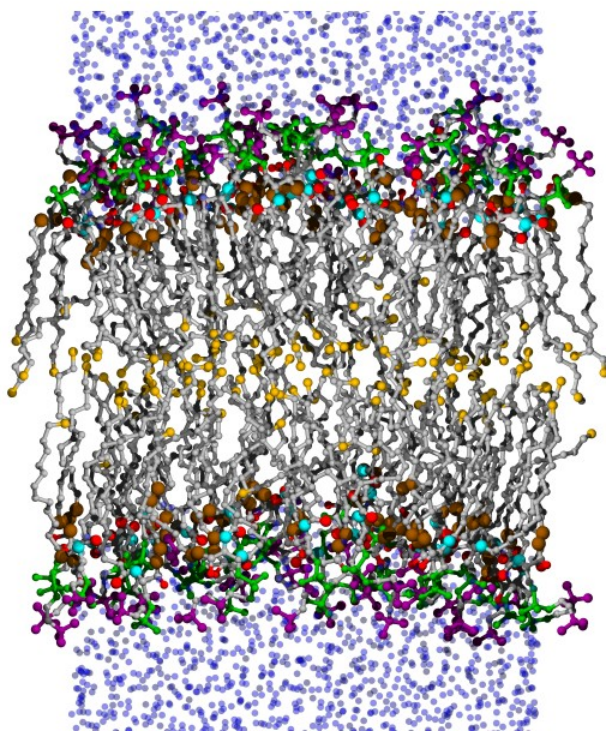

**Figure S6.** Molecular image snapshot at 200 ns from the PSM simulation run with CHARMM, top and side views. Colors: water is transparent blue, the choline group is purple, the phosphate group is green, amide N is cyan, amide O is orange, hydroxyl O is red, vinyl C=C atoms are brown, chain ends are yellow; all other C atoms are gray.

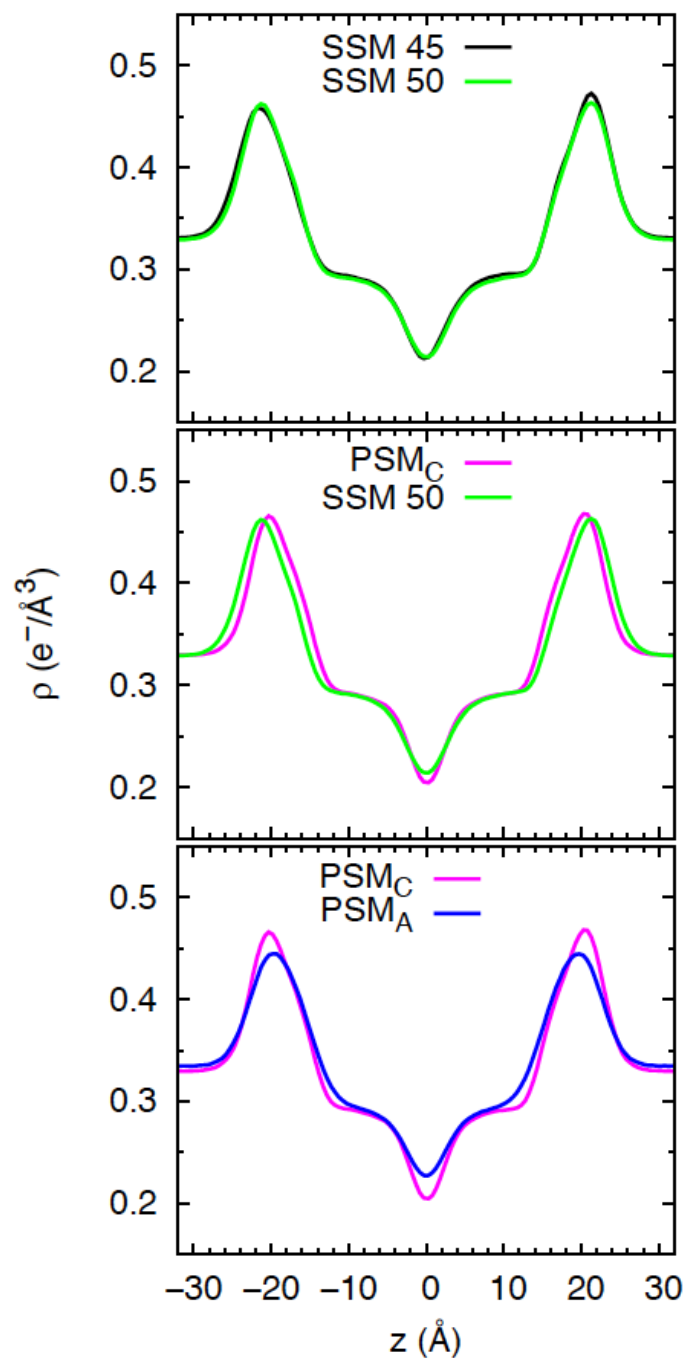

**Figure S7.** Electron density  $z$  profiles for all atoms. Top panel: comparison of SSM at 45 and 50°C; they are nearly identical. Middle panel: CHARMM simulations of SSM at 50°C and PSM at 48°C; the expected smaller  $d_{p,p}$  is observed for PSM. Bottom panel: PSM simulations from CHARMM (PSM<sub>C</sub>) and Anton (PSM<sub>A</sub>); the difference is most likely due to the different VDW methods and cutoffs.

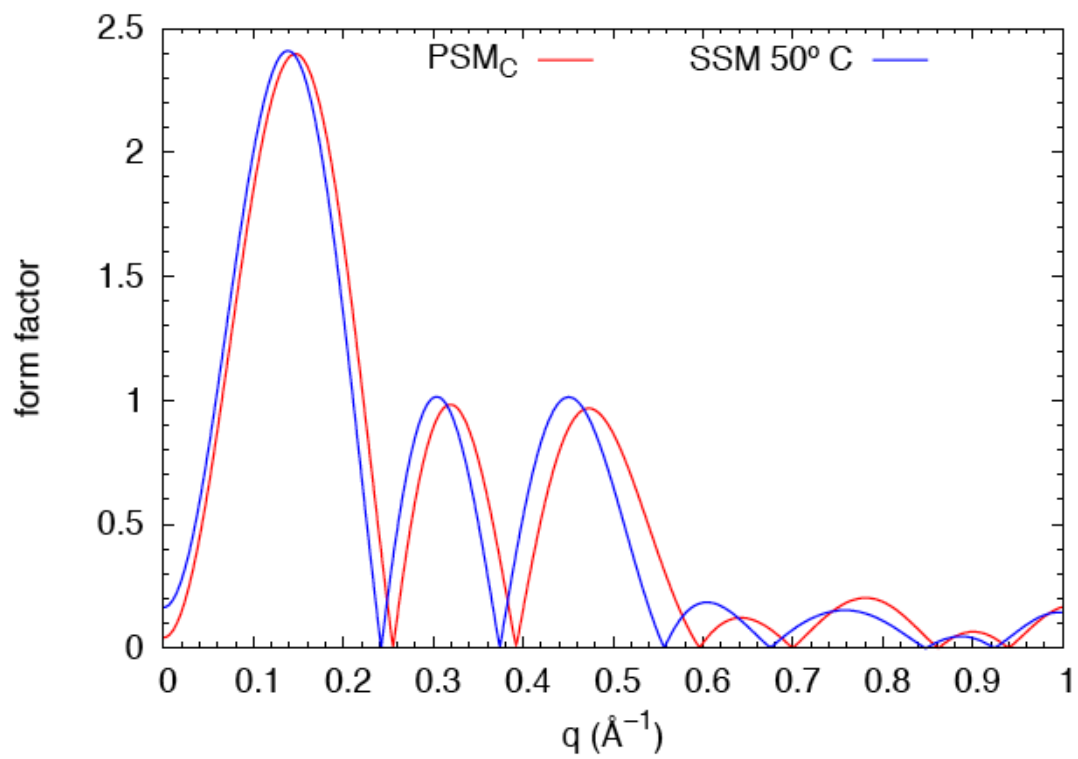

**Figure S8.** Calculated x-ray scattering form factors from the MD simulations.



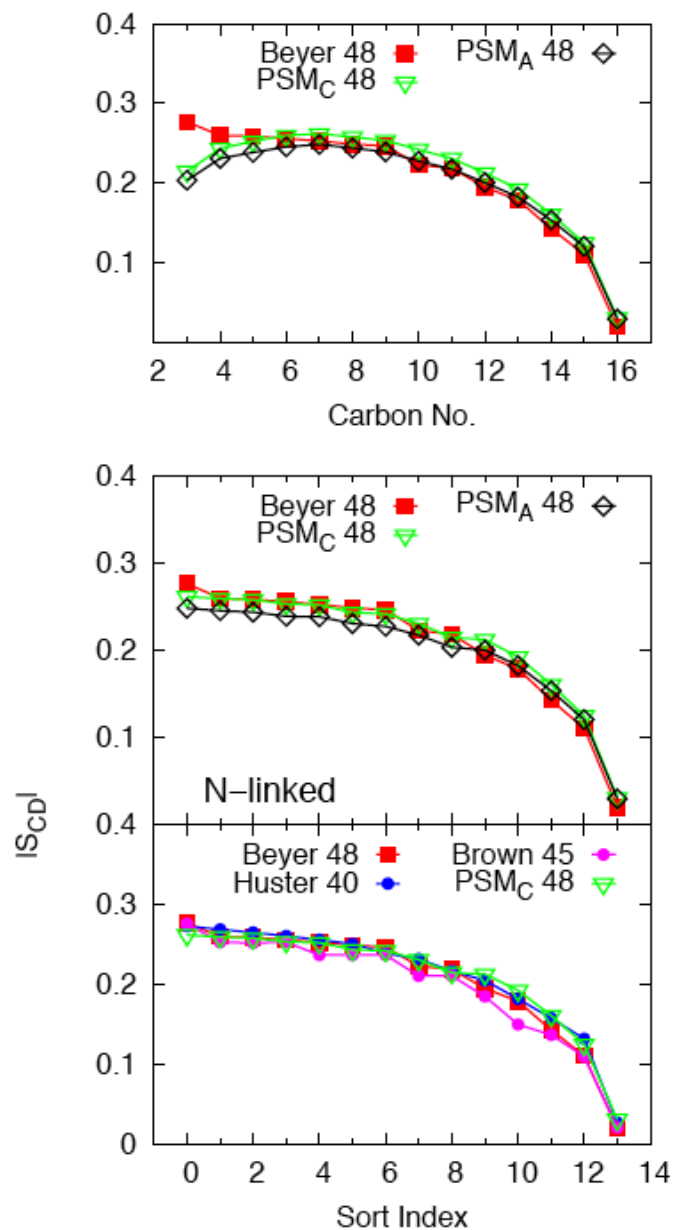

**Figure S9.** Order parameter profiles based on chain position (top panel) and value-sorted order (lower 2 panels). Labels: PSM<sub>C</sub> = PSM simulated with CHARMM; PSM<sub>A</sub> = PSM simulated with Anton; Beyer (7), Huster (8), and Brown (9) are the last authors of the respective PSM-d31 NMR papers; the temperature from experiment or simulation is listed in each label. The top panel shows an apparent discrepancy, which is resolved by value sorting the simulation values, as shown in the middle panel. The lower panel compares the sorted  $S_{CD}$  profile from the CHARMM simulation to the profiles from all three NMR papers.

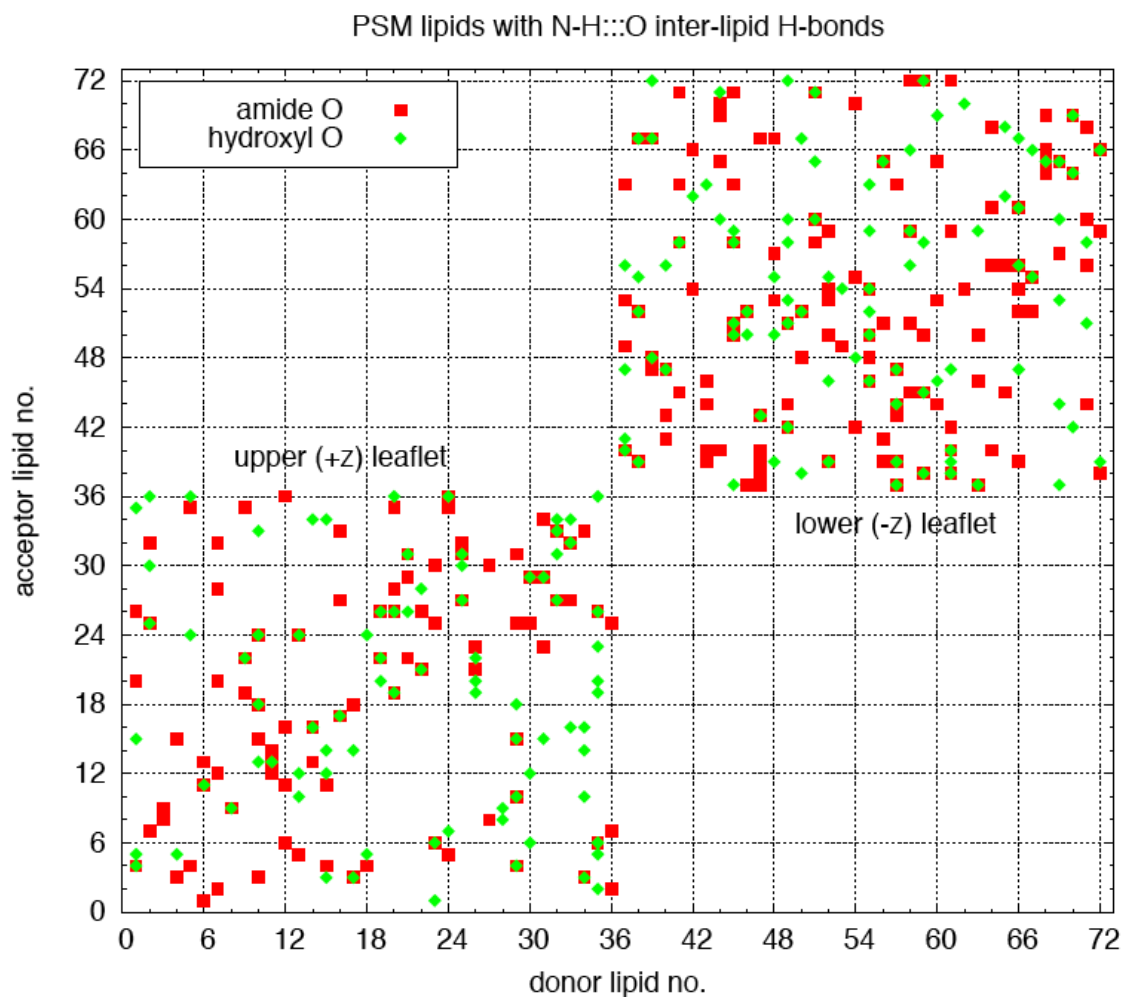

**Figure S10.** Observed inter-lipid H-bonds with an occupancy of 0.1% or above.

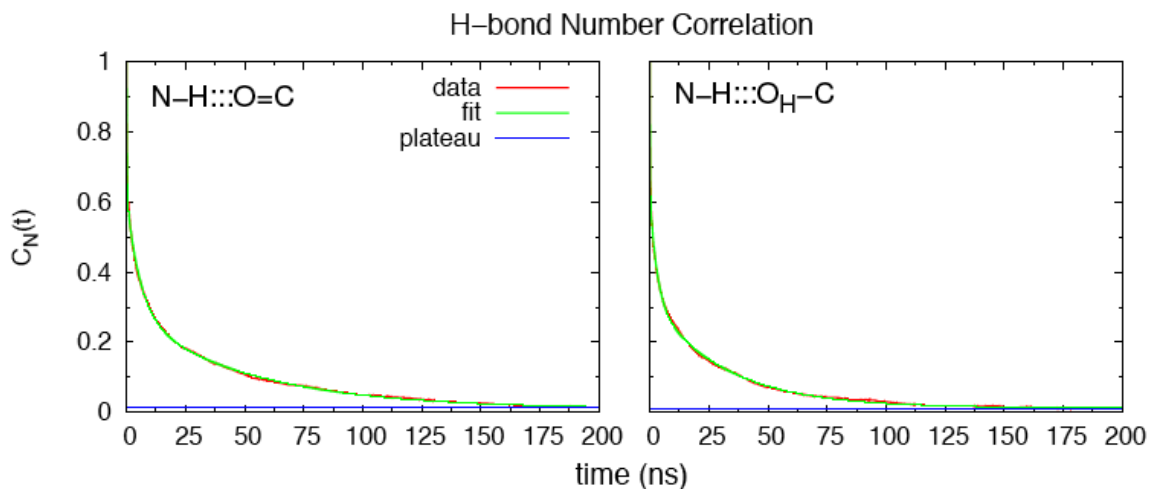

**Figure S11.** Hydrogen bond number correlation functions and fits for PSM, using the pairs shown in Figure S10; see Table S2 below for fit data.

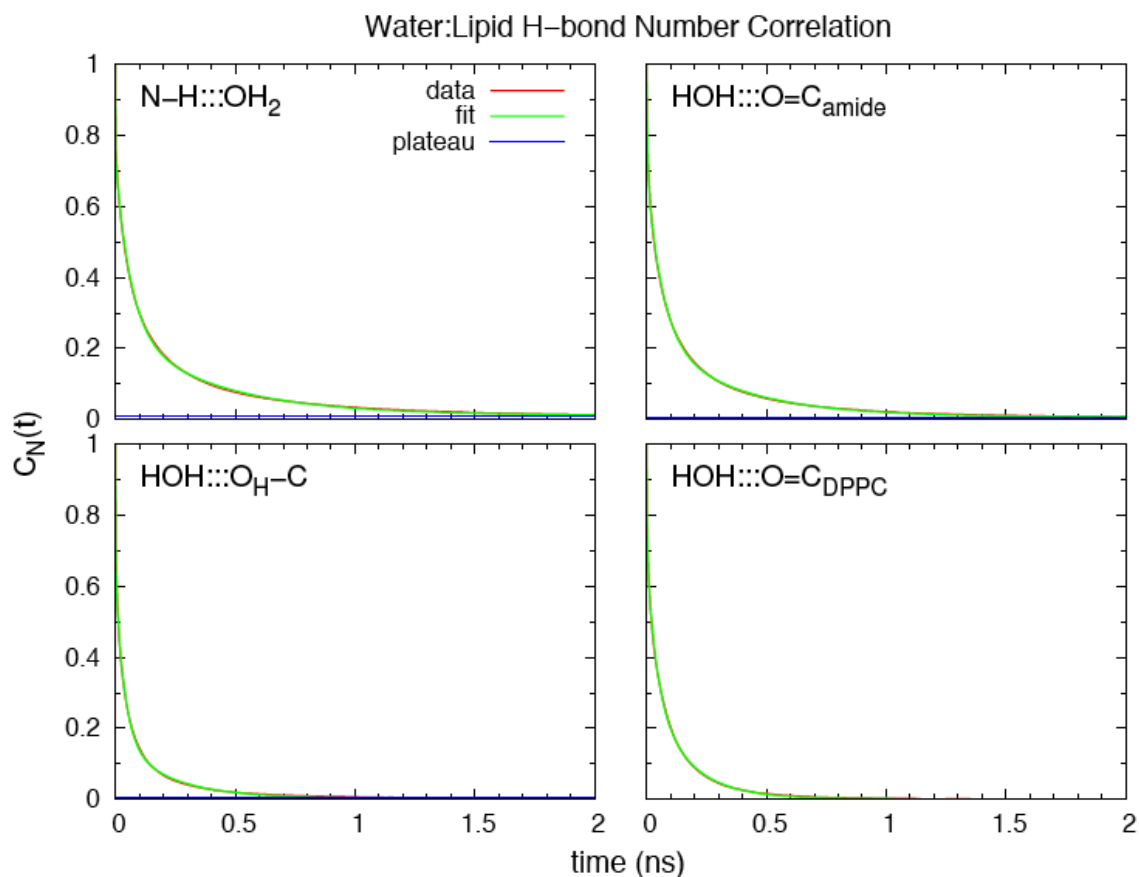

**Figure S12.** Number correlation functions for water-lipid hydrogen bonds. Correlation functions were evaluated from twenty 5 ns intervals, spaced 20 ns apart; the lower right panel is for the DPPC ester carbonyl O as the acceptor, the other 3 panels represent water:PSM interactions, with the amide H as a donor in the top left panel.

**Table S2.** Fit coefficients ( $a$ ) and relaxation times ( $\tau$ , ns) from 3 exponential fits.

| $C_N(t)$                   | $a_1$ | $\tau_1$ | $a_2$ | $\tau_2$ | $a_3$ | $\tau_3$ | plateau <sup>a</sup> |
|----------------------------|-------|----------|-------|----------|-------|----------|----------------------|
| N-H:::OH <sub>2</sub>      | 0.268 | 0.001    | 0.480 | 0.064    | 0.240 | 0.401    | 0.011                |
| HOH:::O=C <sub>amide</sub> | 0.291 | 0.004    | 0.474 | 0.065    | 0.229 | 0.350    | 0.006                |
| HOH:::O <sub>H</sub> -C    | 0.363 | 0.002    | 0.465 | 0.037    | 0.168 | 0.210    | 0.003                |
| HOH:::O=C <sub>DPPC</sub>  | 0.299 | 0.003    | 0.382 | 0.040    | 0.318 | 0.155    | 0.001                |

<sup>a</sup> The plateau values were free parameters in the three exponential fit, which was constrained by the expression  $a_1 + a_2 + a_3 + \text{plateau} = 1.0$ .

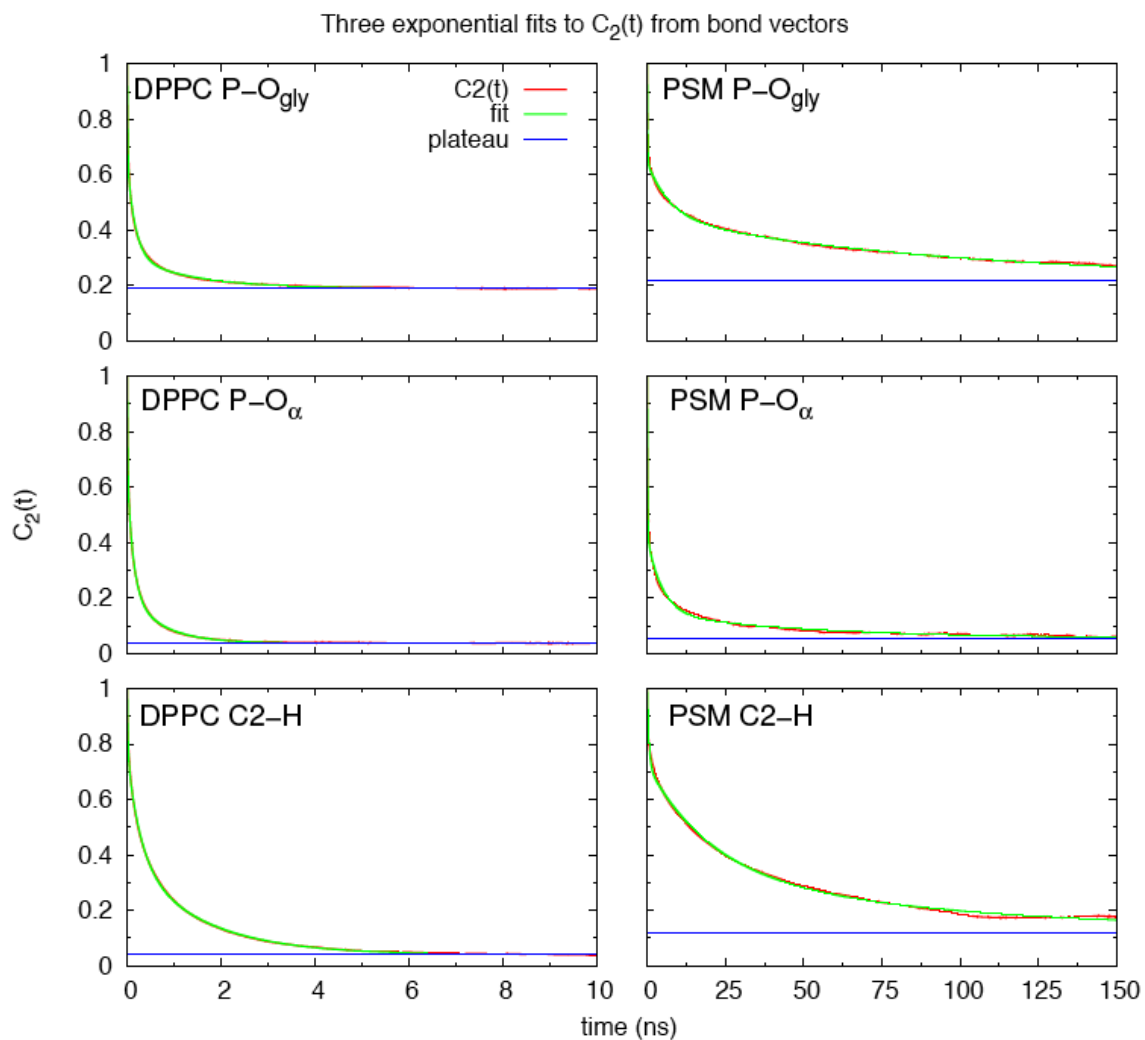

**Figure S13.** Second rank reorientational correlation functions  $C_2(t) = \langle P_2(\hat{\mu}(0) \cdot \hat{\mu}(t)) \rangle$  selected bonds of DPPC (left) and PSM (right).

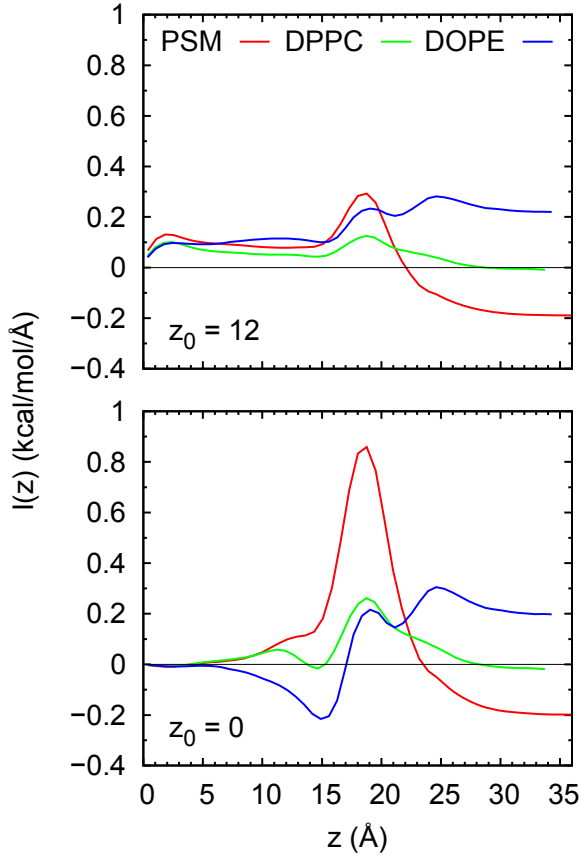

**Figure S14.** Evaluation of  $\bar{F}'(0)$  from integration of the pressure profiles. Equation (2) in the main text can be written more generally as

$$\bar{F}'(0) = - \int_0^{L_z/2} (z - z_0)[p_T(z) - p_N(z)]dz$$

where  $z_0$  is an arbitrary plane in the bilayer. The lower panel of the figure shows the integral

$$I(z) = - \int_0^z (z' - z_0)[p_T(z') - p_N(z')]dz'$$

when  $z_0=0$  (the bilayer midplane). It is evident that values for  $z \approx 35 \text{ \AA}$ , which approximate  $\bar{F}'(0)$ , are quite distinct, lending increased confidence to the result that  $\bar{F}'(0)$  for PSM is approximately equal in magnitude to that of DOPE but opposite in sign; i.e., a bilayer of pure PSM has positive curvature. This result does not depend on the value of  $z_0$ : as shown in the top panel for  $z_0 = 12 \text{ \AA}$ , the intermediate values of  $I(z)$  differ for those of  $z_0 = 0$ , but  $\bar{F}'(0)$  is the same.

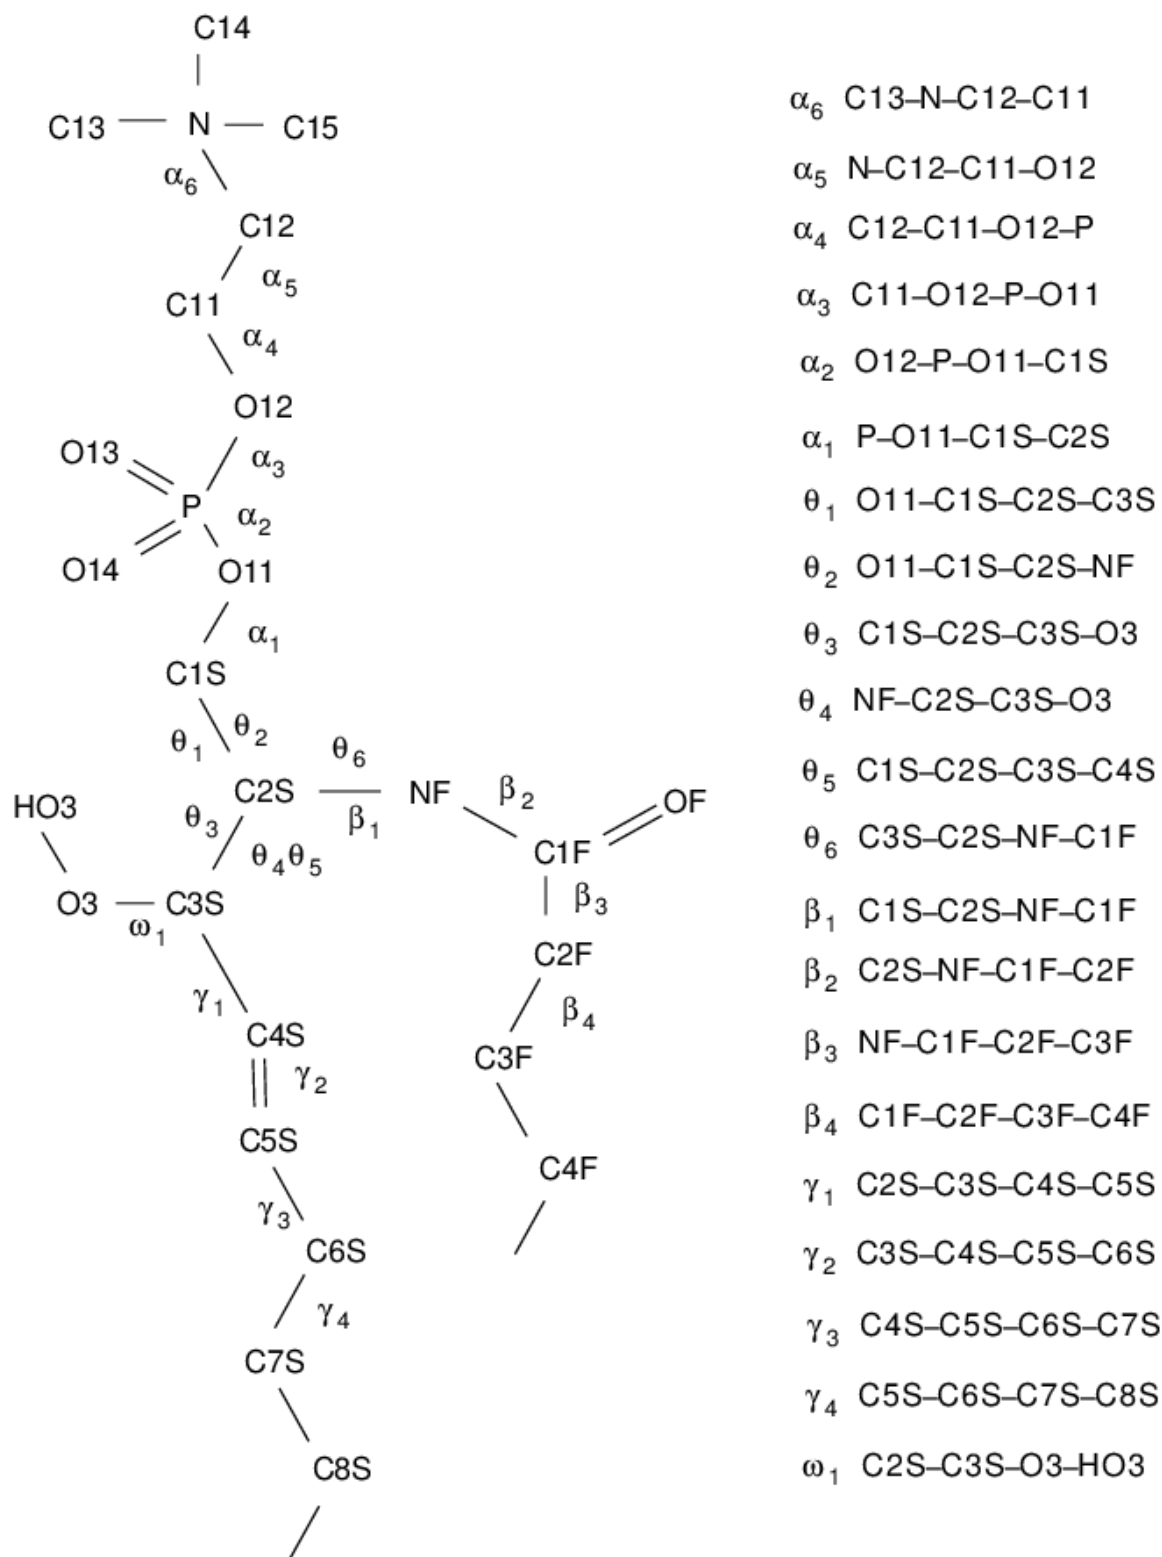

**Figure S15.** Atom names, and dihedral labels and definitions used for head group conformational analysis, and for the plots in Figure S16.

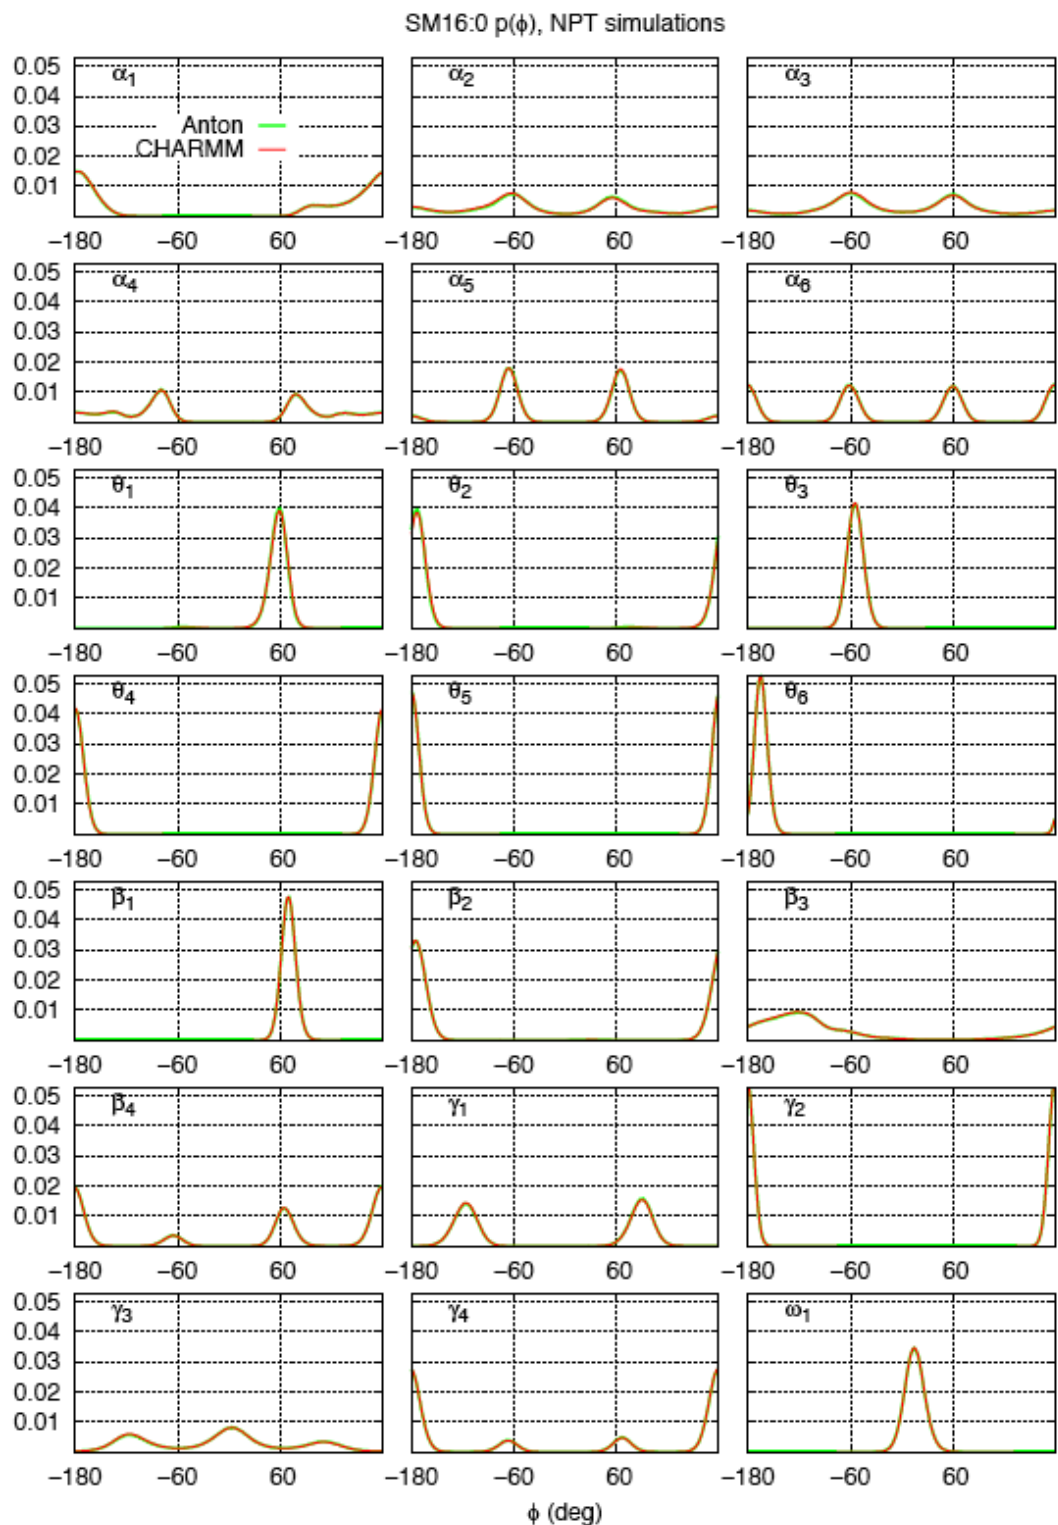

**Figure S16.** PSM head group dihedral distributions from both CHARMM and ANTON simulations.

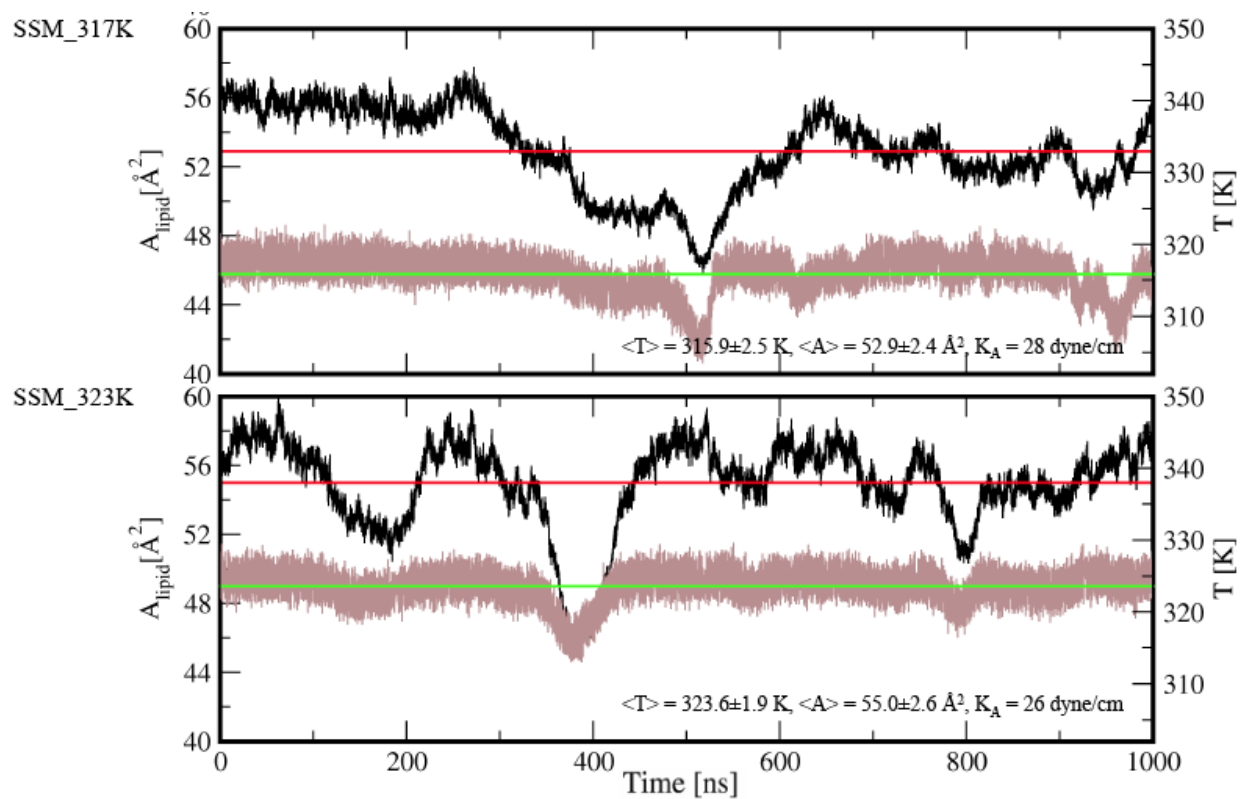

**Figure S17.** Temperature and area/lipid anomalies observed for SSM on ANTON. The black and red lines are the respective area/lipid time series and averages (left axis); the brown and green lines are time series and averages for the temperature (right axis).



## Topology and parameter stream file input for CHARMM.

The following pages are the complete listing of the file with the new molecules and parameters added for sphingomyelins, in CHARMM input format. While complete, using cut-and-paste of these listings to obtain the inputs is inadvisable, due to line wrap issues. The file can be downloaded from <http://terpconnect.umd.edu/~jbklauda/research/download.html>.

```
* Toppar stream for ceramides and spingomyelins; requires flex format files
* Lipid: top_all136_lipid.rtf and par_all136_lipid.prm
* Protein: top_all136_prot.rtf and par_all136_prot.prm
*
! REFERENCES
!
! PSM and SSM Lipids
!
! Venable, R.M., B. Rogaski, H. Rui, L. Hatcher, A.D. MacKerell, Jr., R.W. Pastor,
! & J.B. Klauda. CHARMM All-Atom Additive Force Field for Sphingomyelin:
! Elucidation of Hydrogen Bonding and of Positive Curvature. In prep. (2014).
!
! Ceramide
!
! Submitted by Sam Tondast-Navaei of U. Cincinnati. Advised by Russell Devane
!

set nat ?NATC
set app
!We're exploiting what is arguably a bug in the parser. On the left hand side,
!the quotes have proirity, so NAT is correctly substituted. On the right hand
!side, the ? has priority and NAT" (sic) is not a valid substitution...
if "@NAT" ne "?NATC" if @nat ne 0 set app append

read rtf card @app
* cer/sm residues
*
36 1

! Ceramides

MASS 165 NHL 14.00700 N !
MASS 166 CTO1 12.01100 C !
MASS 167 CEL3 12.01100 C !
MASS 168 CTO2 12.01100 C !

RESI PSM 0.00 ! sphingomyelin d18:1/16:0
GROUP !
ATOM N NTL -0.60 !
ATOM C15 CTL5 -0.35 !
ATOM H15A HL 0.25 !
ATOM H15B HL 0.25 !
ATOM H15C HL 0.25 !
ATOM C14 CTL5 -0.35 !
ATOM H14A HL 0.25 !
ATOM H14B HL 0.25 !
ATOM H14C HL 0.25 !
ATOM C13 CTL5 -0.35 !
ATOM H13A HL 0.25 !
ATOM H13B HL 0.25 !
ATOM H13C HL 0.25 !
ATOM C12 CTL2 -0.10 !
ATOM H12A HL 0.25 !
ATOM H12B HL 0.25 !
GROUP !
ATOM C11 CTL2 -0.08 !
ATOM H11A HAL2 0.09 !
ATOM H11B HAL2 0.09 !

          H15B
          |
          H15A-C15-H15C
          |
          H13C | H14C
          |   |
H13A-C13---N--C14-H14A (+)
          |   |
          H13B | H14B
          |
          H12A-C12-H12B
          |
          H11A-C11-H11B
          |
          (-) O13 O12
```

|           |      |         |
|-----------|------|---------|
| ATOM P    | PL   | 1.50 !  |
| ATOM O13  | O2L  | -0.78 ! |
| ATOM O14  | O2L  | -0.78 ! |
| ATOM O11  | OSLP | -0.57 ! |
| ATOM O12  | OSLP | -0.57 ! |
| ATOM C1S  | CTL2 | -0.08 ! |
| ATOM H1S  | HAL2 | 0.09 !  |
| ATOM H1T  | HAL2 | 0.09 !  |
| GROUP     |      | !       |
| ATOM NF   | NHL  | -0.70 ! |
| ATOM HNF  | H    | 0.35 !  |
| ATOM C2S  | CTL1 | 0.30 !  |
| ATOM H2S  | HAL1 | 0.05 !  |
| GROUP     |      | !       |
| ATOM C3S  | CTO1 | 0.50 !  |
| ATOM H3S  | HAL1 | -0.11 ! |
| ATOM O3   | OHL  | -0.69 ! |
| ATOM HO3  | HOL  | 0.30 !  |
| GROUP     |      | !       |
| ATOM C4S  | CEL3 | -0.15 ! |
| ATOM H4S  | HEL1 | 0.15 !  |
| GROUP     |      | !       |
| ATOM C5S  | CEL3 | -0.15 ! |
| ATOM H5S  | HEL1 | 0.15 !  |
| GROUP     |      | !       |
| ATOM C6S  | CTL2 | -0.18 ! |
| ATOM H6S  | HAL2 | 0.09 !  |
| ATOM H6T  | HAL2 | 0.09 !  |
| GROUP     |      | !       |
| ATOM C7S  | CTL2 | -0.18 ! |
| ATOM H7S  | HAL2 | 0.09 !  |
| ATOM H7T  | HAL2 | 0.09 !  |
| GROUP     |      | !       |
| ATOM C8S  | CTL2 | -0.18 ! |
| ATOM H8S  | HAL2 | 0.09 !  |
| ATOM H8T  | HAL2 | 0.09 !  |
| GROUP     |      | !       |
| ATOM C9S  | CTL2 | -0.18 ! |
| ATOM H9S  | HAL2 | 0.09 !  |
| ATOM H9T  | HAL2 | 0.09 !  |
| GROUP     |      | !       |
| ATOM C10S | CTL2 | -0.18 ! |
| ATOM H10S | HAL2 | 0.09 !  |
| ATOM H10T | HAL2 | 0.09 !  |
| GROUP     |      | !       |
| ATOM C11S | CTL2 | -0.18 ! |
| ATOM H11S | HAL2 | 0.09 !  |
| ATOM H11T | HAL2 | 0.09 !  |
| GROUP     |      | !       |
| ATOM C12S | CTL2 | -0.18 ! |
| ATOM H12S | HAL2 | 0.09 !  |
| ATOM H12T | HAL2 | 0.09 !  |
| GROUP     |      | !       |
| ATOM C13S | CTL2 | -0.18 ! |
| ATOM H13S | HAL2 | 0.09 !  |
| ATOM H13T | HAL2 | 0.09 !  |
| GROUP     |      | !       |
| ATOM C14S | CTL2 | -0.18 ! |
| ATOM H14S | HAL2 | 0.09 !  |
| ATOM H14T | HAL2 | 0.09 !  |
| GROUP     |      | !       |
| ATOM C15S | CTL2 | -0.18 ! |
| ATOM H15S | HAL2 | 0.09 !  |
| ATOM H15T | HAL2 | 0.09 !  |
| GROUP     |      | !       |
| ATOM C16S | CTL2 | -0.18 ! |
| ATOM H16S | HAL2 | 0.09 !  |
| ATOM H16T | HAL2 | 0.09 !  |
| GROUP     |      | !       |
| ATOM C17S | CTL2 | -0.18 ! |
| ATOM H17S | HAL2 | 0.09 !  |

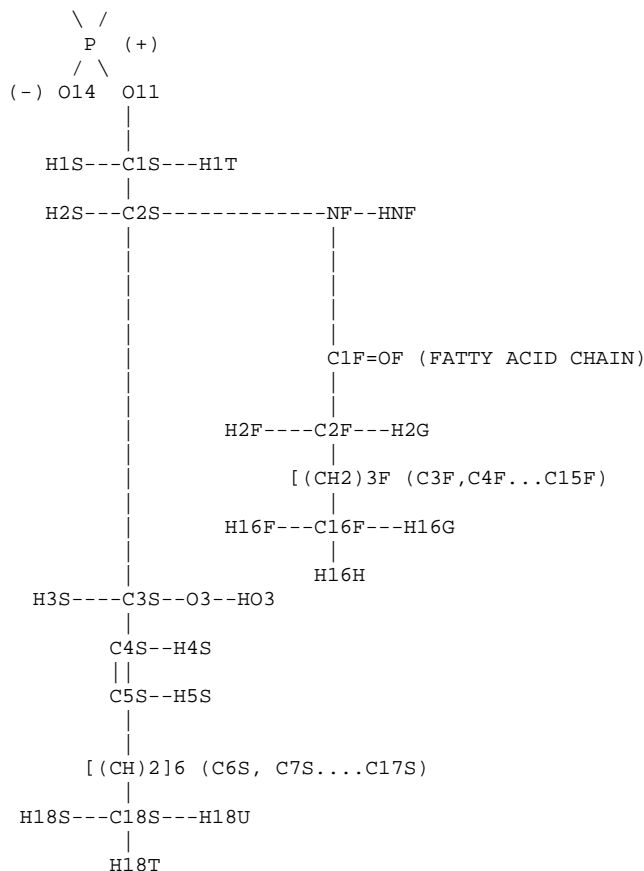

|           |      |       |                   |
|-----------|------|-------|-------------------|
| ATOM H17T | HAL2 | 0.09  | !                 |
| GROUP     |      |       | !                 |
| ATOM C18S | CTL3 | -0.27 | !                 |
| ATOM H18S | HAL3 | 0.09  | !                 |
| ATOM H18T | HAL3 | 0.09  | !                 |
| ATOM H18U | HAL3 | 0.09  | !                 |
| GROUP     |      |       | !                 |
|           |      |       | !FATTY ACID CHAIN |
| ATOM C1F  | C    | 0.55  | !                 |
| ATOM OF   | O    | -0.60 | !                 |
| ATOM C2F  | CTL2 | -0.07 | !                 |
| ATOM H2F  | HAL2 | 0.06  | !                 |
| ATOM H2G  | HAL2 | 0.06  | !                 |
| GROUP     |      |       | !                 |
| ATOM C3F  | CTL2 | -0.18 | !                 |
| ATOM H3F  | HAL2 | 0.09  | !                 |
| ATOM H3G  | HAL2 | 0.09  | !                 |
| GROUP     |      |       | !                 |
| ATOM C4F  | CTL2 | -0.18 | !                 |
| ATOM H4F  | HAL2 | 0.09  | !                 |
| ATOM H4G  | HAL2 | 0.09  | !                 |
| GROUP     |      |       | !                 |
| ATOM C5F  | CTL2 | -0.18 | !                 |
| ATOM H5F  | HAL2 | 0.09  | !                 |
| ATOM H5G  | HAL2 | 0.09  | !                 |
| GROUP     |      |       | !                 |
| ATOM C6F  | CTL2 | -0.18 | !                 |
| ATOM H6F  | HAL2 | 0.09  | !                 |
| ATOM H6G  | HAL2 | 0.09  | !                 |
| GROUP     |      |       | !                 |
| ATOM C7F  | CTL2 | -0.18 | !                 |
| ATOM H7F  | HAL2 | 0.09  | !                 |
| ATOM H7G  | HAL2 | 0.09  | !                 |
| GROUP     |      |       | !                 |
| ATOM C8F  | CTL2 | -0.18 | !                 |
| ATOM H8F  | HAL2 | 0.09  | !                 |
| ATOM H8G  | HAL2 | 0.09  | !                 |
| GROUP     |      |       | !                 |
| ATOM C9F  | CTL2 | -0.18 | !                 |
| ATOM H9F  | HAL2 | 0.09  | !                 |
| ATOM H9G  | HAL2 | 0.09  | !                 |
| GROUP     |      |       | !                 |
| ATOM C10F | CTL2 | -0.18 | !                 |
| ATOM H10F | HAL2 | 0.09  | !                 |
| ATOM H10G | HAL2 | 0.09  | !                 |
| GROUP     |      |       | !                 |
| ATOM C11F | CTL2 | -0.18 | !                 |
| ATOM H11F | HAL2 | 0.09  | !                 |
| ATOM H11G | HAL2 | 0.09  | !                 |
| GROUP     |      |       | !                 |
| ATOM C12F | CTL2 | -0.18 | !                 |
| ATOM H12F | HAL2 | 0.09  | !                 |
| ATOM H12G | HAL2 | 0.09  | !                 |
| GROUP     |      |       | !                 |
| ATOM C13F | CTL2 | -0.18 | !                 |
| ATOM H13F | HAL2 | 0.09  | !                 |
| ATOM H13G | HAL2 | 0.09  | !                 |
| GROUP     |      |       | !                 |
| ATOM C14F | CTL2 | -0.18 | !                 |
| ATOM H14F | HAL2 | 0.09  | !                 |
| ATOM H14G | HAL2 | 0.09  | !                 |
| GROUP     |      |       | !                 |
| ATOM C15F | CTL2 | -0.18 | !                 |
| ATOM H15F | HAL2 | 0.09  | !                 |
| ATOM H15G | HAL2 | 0.09  | !                 |
| GROUP     |      |       | !                 |
| ATOM C16F | CTL3 | -0.27 | !                 |
| ATOM H16F | HAL3 | 0.09  | !                 |
| ATOM H16G | HAL3 | 0.09  | !                 |
| ATOM H16H | HAL3 | 0.09  | !                 |

!SPHINGOSINE CHAIN

BOND C18S H18S C18S H18T C18S H18U  
 BOND C18S C17S C17S H17S C17S H17T  
 BOND C17S C16S C16S H16S C16S H16T  
 BOND C16S C15S C15S H15S C15S H15T  
 BOND C15S C14S C14S H14S C14S H14T  
 BOND C14S C13S C13S H13S C13S H13T  
 BOND C13S C12S C12S H12S C12S H12T  
 BOND C12S C11S C11S H11S C11S H11T  
 BOND C11S C10S C10S H10S C10S H10T  
 BOND C10S C9S C9S H9S C9S H9T  
 BOND C9S C8S C8S H8S C8S H8T  
 BOND C8S C7S C7S H7S C7S H7T  
 BOND C7S C6S C6S H6S C6S H6T  
 BOND C6S C5S C5S H5S C4S H4S  
 BOND C4S C3S C3S H3S C3S O3  
 BOND O3 HO3  
 BOND C3S C2S C2S H2S  
 BOND C2S C1S C1S H1S C1S H1T  
 BOND C1S O11

!PHOSLPHOCHOLINE

BOND O11 P O12 P O13 P O14 P  
 BOND O12 C11 C11 H11A C11 H11B  
 BOND C11 C12 C12 H12A C12 H12B  
 BOND C12 N N C13 N C14 N C15  
 BOND C13 H13A C13 H13B C13 H13C  
 BOND C14 H14A C14 H14B C14 H14C  
 BOND C15 H15A C15 H15B C15 H15C

!FATTY ACID CHAIN

BOND C2S NF NF HNF NF C1F  
 BOND C1F C2F C2F H2F C2F H2G  
 BOND C2F C3F C3F H3F C3F H3G  
 BOND C3F C4F C4F H4F C4F H4G  
 BOND C4F C5F C5F H5F C5F H5G  
 BOND C5F C6F C6F H6F C6F H6G  
 BOND C6F C7F C7F H7F C7F H7G  
 BOND C7F C8F C8F H8F C8F H8G  
 BOND C8F C9F C9F H9F C9F H9G  
 BOND C9F C10F C10F H10F C10F H10G  
 BOND C10F C11F C11F H11F C11F H11G  
 BOND C11F C12F C12F H12F C12F H12G  
 BOND C12F C13F C13F H13F C13F H13G  
 BOND C13F C14F C14F H14F C14F H14G  
 BOND C14F C15F C15F H15F C15F H15G  
 BOND C15F C16F C16F H16F C16F H16G  
 BOND C16F H16H

DOUBLE C4S C5S  
 DOUBLE C1F OF  
 IMPR C1F C2F NF OF NF C1F C2S HNF

|    |      |  |      |  |      |  |      |  |        |        |         |        |        |
|----|------|--|------|--|------|--|------|--|--------|--------|---------|--------|--------|
| IC | C18S |  | C17S |  | C16S |  | C15S |  | 1.5309 | 113.23 | 180.00  | 112.64 | 1.5346 |
| IC | C17S |  | C16S |  | C15S |  | C14S |  | 1.5337 | 112.64 | 180.00  | 112.58 | 1.5345 |
| IC | C16S |  | C15S |  | C14S |  | C13S |  | 1.5346 | 112.58 | 180.00  | 112.58 | 1.5345 |
| IC | C15S |  | C14S |  | C13S |  | C12S |  | 1.5345 | 112.58 | -179.99 | 112.58 | 1.5345 |
| IC | C14S |  | C13S |  | C12S |  | C11S |  | 1.5345 | 112.58 | 179.97  | 112.58 | 1.5344 |
| IC | C13S |  | C12S |  | C11S |  | C10S |  | 1.5345 | 112.58 | -179.96 | 112.61 | 1.5345 |
| IC | C12S |  | C11S |  | C10S |  | C9S  |  | 1.5344 | 112.61 | 179.97  | 112.54 | 1.5344 |
| IC | C11S |  | C10S |  | C9S  |  | C8S  |  | 1.5345 | 112.54 | -179.87 | 112.66 | 1.5345 |
| IC | C10S |  | C9S  |  | C8S  |  | C7S  |  | 1.5344 | 112.66 | -179.89 | 112.50 | 1.5354 |
| IC | C9S  |  | C8S  |  | C7S  |  | C6S  |  | 1.5345 | 112.50 | -179.79 | 112.41 | 1.5391 |
| IC | C8S  |  | C7S  |  | C6S  |  | C5S  |  | 1.5354 | 112.41 | -179.61 | 111.46 | 1.5077 |
| IC | C7S  |  | C6S  |  | C5S  |  | C4S  |  | 1.5391 | 111.46 | -117.13 | 124.77 | 1.3444 |
| IC | C6S  |  | C5S  |  | C4S  |  | C3S  |  | 1.5077 | 124.77 | 179.01  | 124.28 | 1.5009 |
| IC | C5S  |  | C4S  |  | C3S  |  | C2S  |  | 1.3444 | 124.28 | -84.24  | 110.14 | 1.5343 |
| IC | C5S  |  | C4S  |  | C3S  |  | O3   |  | 1.3444 | 124.28 | 156.07  | 107.64 | 1.4235 |
| IC | C13  |  | C12  |  | *N   |  | C14  |  | 1.4967 | 109.68 | 116.91  | 107.30 | 1.5040 |
| IC | C13  |  | C12  |  | *N   |  | C15  |  | 1.4967 | 109.68 | -123.42 | 110.88 | 1.4938 |
| IC | C12  |  | N    |  | C15  |  | H15A |  | 1.5212 | 110.88 | -177.15 | 111.31 | 1.0816 |
| IC | H15A |  | N    |  | *C15 |  | H15B |  | 1.0816 | 111.31 | 118.98  | 109.44 | 1.0875 |
| IC | H15A |  | N    |  | *C15 |  | H15C |  | 1.0816 | 111.31 | -122.11 | 111.46 | 1.0818 |
| IC | C12  |  | N    |  | C14  |  | H14A |  | 1.5212 | 107.30 | -178.89 | 114.23 | 1.0739 |

|    |      |      |       |      |        |        |         |        |        |
|----|------|------|-------|------|--------|--------|---------|--------|--------|
| IC | H14A | N    | *C14  | H14B | 1.0739 | 114.23 | 123.44  | 110.21 | 1.0968 |
| IC | H14A | N    | *C14  | H14C | 1.0739 | 114.23 | -124.43 | 111.41 | 1.0948 |
| IC | C12  | N    | C13   | H13A | 1.5212 | 109.68 | 176.44  | 111.15 | 1.0822 |
| IC | H13A | N    | *C13  | H13B | 1.0822 | 111.15 | 121.89  | 111.75 | 1.0814 |
| IC | H13A | N    | *C13  | H13C | 1.0822 | 111.15 | -118.50 | 109.57 | 1.0892 |
| IC | C13  | N    | C12   | C11  | 1.4967 | 109.68 | -178.83 | 116.30 | 1.5392 |
| IC | C11  | N    | *C12  | H12A | 1.5392 | 116.30 | 117.04  | 108.30 | 1.0985 |
| IC | C11  | N    | *C12  | H12B | 1.5392 | 116.30 | -126.61 | 112.36 | 1.0787 |
| IC | N    | C12  | C11   | O12  | 1.5212 | 116.30 | 126.79  | 107.85 | 1.4239 |
| IC | O12  | C12  | *C11  | H11A | 1.4239 | 107.85 | 118.10  | 109.30 | 1.1131 |
| IC | O12  | C12  | *C11  | H11B | 1.4239 | 107.85 | -123.12 | 113.16 | 1.1140 |
| IC | C12  | C11  | O12   | P    | 1.5392 | 107.85 | -68.29  | 118.09 | 1.5886 |
| IC | C11  | O12  | P     | O11  | 1.4239 | 118.09 | -167.58 | 104.18 | 1.5725 |
| IC | O11  | O12  | *P    | O13  | 1.5725 | 104.18 | 116.57  | 107.05 | 1.4823 |
| IC | O11  | O12  | *P    | O14  | 1.5725 | 104.18 | -118.73 | 106.98 | 1.4805 |
| IC | O12  | P    | O11   | C1S  | 1.5886 | 104.18 | 51.85   | 121.69 | 1.4327 |
| IC | P    | O11  | C1S   | C2S  | 1.5725 | 121.69 | 103.66  | 111.21 | 1.5586 |
| IC | C2S  | O11  | *C1S  | H1S  | 1.5586 | 111.21 | 118.79  | 108.35 | 1.1121 |
| IC | C2S  | O11  | *C1S  | H1T  | 1.5586 | 111.21 | -123.25 | 112.85 | 1.1152 |
| IC | C2S  | C3S  | O3    | HO3  | 1.5343 | 109.80 | 46.50   | 104.54 | 0.9610 |
| IC | C2S  | C3S  | C4S   | C5S  | 1.5343 | 110.14 | -84.24  | 124.28 | 1.3444 |
| IC | C5S  | C3S  | *C4S  | H4S  | 1.3444 | 124.28 | 178.79  | 115.93 | 1.1003 |
| IC | C3S  | C4S  | C5S   | C6S  | 1.5009 | 124.28 | 179.01  | 124.77 | 1.5077 |
| IC | C6S  | C4S  | *C5S  | H5S  | 1.5077 | 124.77 | -178.18 | 119.00 | 1.1029 |
| IC | C4S  | C5S  | C6S   | C7S  | 1.3444 | 124.77 | -117.13 | 111.46 | 1.5391 |
| IC | C7S  | C5S  | *C6S  | H6S  | 1.5391 | 111.46 | 120.98  | 111.41 | 1.1142 |
| IC | C7S  | C5S  | *C6S  | H6T  | 1.5391 | 111.46 | -120.60 | 109.91 | 1.1125 |
| IC | C5S  | C6S  | C7S   | C8S  | 1.5077 | 111.46 | -179.61 | 112.41 | 1.5354 |
| IC | C8S  | C6S  | *C7S  | H7S  | 1.5354 | 112.41 | 121.26  | 109.74 | 1.1138 |
| IC | C8S  | C6S  | *C7S  | H7T  | 1.5354 | 112.41 | -120.99 | 109.40 | 1.1147 |
| IC | C6S  | C7S  | C8S   | C9S  | 1.5391 | 112.41 | -179.79 | 112.50 | 1.5345 |
| IC | C9S  | C7S  | *C8S  | H8S  | 1.5345 | 112.50 | 121.20  | 108.97 | 1.1132 |
| IC | C9S  | C7S  | *C8S  | H8T  | 1.5345 | 112.50 | -121.38 | 109.07 | 1.1129 |
| IC | C7S  | C8S  | C9S   | C10S | 1.5354 | 112.50 | -179.89 | 112.66 | 1.5344 |
| IC | C10S | C8S  | *C9S  | H9S  | 1.5344 | 112.66 | 121.49  | 109.05 | 1.1133 |
| IC | C10S | C8S  | *C9S  | H9T  | 1.5344 | 112.66 | -121.38 | 108.96 | 1.1136 |
| IC | C8S  | C9S  | C10S  | C11S | 1.5345 | 112.66 | -179.87 | 112.54 | 1.5345 |
| IC | C11S | C9S  | *C10S | H10S | 1.5345 | 112.54 | 121.27  | 109.07 | 1.1133 |
| IC | C11S | C9S  | *C10S | H10T | 1.5345 | 112.54 | -121.34 | 109.11 | 1.1132 |
| IC | C9S  | C10S | C11S  | C12S | 1.5344 | 112.54 | 179.97  | 112.61 | 1.5344 |
| IC | C12S | C10S | *C11S | H11S | 1.5344 | 112.61 | 121.36  | 109.09 | 1.1133 |
| IC | C12S | C10S | *C11S | H11T | 1.5344 | 112.61 | -121.33 | 109.07 | 1.1134 |
| IC | C10S | C11S | C12S  | C13S | 1.5345 | 112.61 | -179.96 | 112.58 | 1.5345 |
| IC | C13S | C11S | *C12S | H12S | 1.5345 | 112.58 | 121.29  | 109.12 | 1.1133 |
| IC | C13S | C11S | *C12S | H12T | 1.5345 | 112.58 | -121.31 | 109.15 | 1.1133 |
| IC | C11S | C12S | C13S  | C14S | 1.5344 | 112.58 | 179.97  | 112.58 | 1.5345 |
| IC | C14S | C12S | *C13S | H13S | 1.5345 | 112.58 | 121.30  | 109.13 | 1.1133 |
| IC | C14S | C12S | *C13S | H13T | 1.5345 | 112.58 | -121.30 | 109.13 | 1.1133 |
| IC | C12S | C13S | C14S  | C15S | 1.5345 | 112.58 | -179.99 | 112.58 | 1.5345 |
| IC | C15S | C13S | *C14S | H14S | 1.5345 | 112.58 | 121.30  | 109.12 | 1.1133 |
| IC | C15S | C13S | *C14S | H14T | 1.5345 | 112.58 | -121.31 | 109.12 | 1.1133 |
| IC | C13S | C14S | C15S  | C16S | 1.5345 | 112.58 | 180.00  | 112.58 | 1.5346 |
| IC | C16S | C14S | *C15S | H15S | 1.5346 | 112.58 | 121.30  | 109.11 | 1.1133 |
| IC | C16S | C14S | *C15S | H15T | 1.5346 | 112.58 | -121.30 | 109.11 | 1.1133 |
| IC | C14S | C15S | C16S  | C17S | 1.5345 | 112.58 | 180.00  | 112.64 | 1.5337 |
| IC | C17S | C15S | *C16S | H16S | 1.5337 | 112.64 | 121.32  | 109.14 | 1.1133 |
| IC | C17S | C15S | *C16S | H16T | 1.5337 | 112.64 | -121.32 | 109.14 | 1.1133 |
| IC | C15S | C16S | C17S  | C18S | 1.5346 | 112.64 | 180.00  | 113.23 | 1.5309 |
| IC | C18S | C16S | *C17S | H17S | 1.5309 | 113.23 | 121.67  | 108.77 | 1.1142 |
| IC | C18S | C16S | *C17S | H17T | 1.5309 | 113.23 | -121.67 | 108.77 | 1.1142 |
| IC | C16S | C17S | C18S  | H18S | 1.5337 | 113.23 | 180.00  | 110.63 | 1.1113 |
| IC | H18S | C17S | *C18S | H18T | 1.1113 | 110.63 | 120.07  | 110.47 | 1.1114 |
| IC | H18S | C17S | *C18S | H18U | 1.1113 | 110.63 | -120.07 | 110.47 | 1.1114 |
| IC | C2S  | NF   | C1F   | C2F  | 1.4406 | 124.85 | -156.83 | 114.97 | 1.4964 |
| IC | C2F  | NF   | *C1F  | OF   | 1.4964 | 114.97 | 162.54  | 122.11 | 1.2268 |
| IC | NF   | C1F  | C2F   | C3F  | 1.3364 | 114.97 | -146.57 | 111.92 | 1.5432 |
| IC | C3F  | C1F  | *C2F  | H2F  | 1.5432 | 111.92 | -120.83 | 107.93 | 1.1115 |
| IC | H2F  | C1F  | *C2F  | H2G  | 1.1115 | 107.93 | -117.30 | 109.04 | 1.1113 |
| IC | C1F  | C2F  | C3F   | C4F  | 1.4964 | 111.92 | 179.54  | 112.84 | 1.5310 |
| IC | C4F  | C2F  | *C3F  | H3F  | 1.5310 | 112.84 | -121.63 | 109.37 | 1.1145 |
| IC | H3F  | C2F  | *C3F  | H3G  | 1.1145 | 109.37 | -117.07 | 109.08 | 1.1157 |

|           |      |      |       |      |        |        |         |        |                           |
|-----------|------|------|-------|------|--------|--------|---------|--------|---------------------------|
| IC        | C2F  | C3F  | C4F   | C5F  | 1.5434 | 112.23 | 174.86  | 112.58 | 1.5342                    |
| IC        | C5F  | C3F  | *C4F  | H4F  | 1.5342 | 112.58 | -120.18 | 108.65 | 1.1140                    |
| IC        | H4F  | C3F  | *C4F  | H4G  | 1.1140 | 108.65 | -117.52 | 109.62 | 1.1127                    |
| IC        | C3F  | C4F  | C5F   | C6F  | 1.5340 | 112.58 | -174.06 | 112.39 | 1.5340                    |
| IC        | C6F  | C4F  | *C5F  | H5F  | 1.5340 | 112.39 | -122.01 | 109.38 | 1.1130                    |
| IC        | H5F  | C4F  | *C5F  | H5G  | 1.1130 | 109.38 | -117.34 | 108.92 | 1.1134                    |
| IC        | C4F  | C5F  | C6F   | C7F  | 1.5342 | 112.39 | 178.27  | 112.75 | 1.5340                    |
| IC        | C7F  | C5F  | *C6F  | H6F  | 1.5340 | 112.75 | -120.93 | 108.96 | 1.1137                    |
| IC        | H6F  | C5F  | *C6F  | H6G  | 1.1137 | 108.96 | -117.41 | 109.22 | 1.1131                    |
| IC        | C5F  | C6F  | C7F   | C8F  | 1.5340 | 112.75 | -178.89 | 112.33 | 1.5342                    |
| IC        | C8F  | C6F  | *C7F  | H7F  | 1.5342 | 112.33 | -121.40 | 109.26 | 1.1132                    |
| IC        | H7F  | C6F  | *C7F  | H7G  | 1.1132 | 109.26 | -117.45 | 109.12 | 1.1130                    |
| IC        | C6F  | C7F  | C8F   | C9F  | 1.5340 | 112.33 | 179.09  | 112.77 | 1.5340                    |
| IC        | C9F  | C7F  | *C8F  | H8F  | 1.5340 | 112.77 | -121.23 | 109.16 | 1.1134                    |
| IC        | H8F  | C7F  | *C8F  | H8G  | 1.1134 | 109.16 | -117.38 | 109.08 | 1.1133                    |
| IC        | C7F  | C8F  | C9F   | C10F | 1.5342 | 112.77 | 179.02  | 112.34 | 1.5343                    |
| IC        | C10F | C8F  | *C9F  | H9F  | 1.5343 | 112.34 | -121.27 | 109.27 | 1.1132                    |
| IC        | H9F  | C8F  | *C9F  | H9G  | 1.1132 | 109.27 | -117.45 | 109.10 | 1.1130                    |
| IC        | C8F  | C9F  | C10F  | C11F | 1.5340 | 112.34 | 178.16  | 112.74 | 1.5340                    |
| IC        | C11F | C9F  | *C10F | H10F | 1.5340 | 112.74 | -121.18 | 109.16 | 1.1134                    |
| IC        | H10F | C9F  | *C10F | H10G | 1.1134 | 109.16 | -117.35 | 109.10 | 1.1132                    |
| IC        | C9F  | C10F | C11F  | C12F | 1.5343 | 112.74 | 178.91  | 112.38 | 1.5343                    |
| IC        | C12F | C10F | *C11F | H11F | 1.5343 | 112.38 | -121.39 | 109.34 | 1.1131                    |
| IC        | H11F | C10F | *C11F | H11G | 1.1131 | 109.34 | -117.43 | 108.98 | 1.1132                    |
| IC        | C10F | C11F | C12F  | C13F | 1.5340 | 112.38 | 176.93  | 112.68 | 1.5340                    |
| IC        | C13F | C11F | *C12F | H12F | 1.5340 | 112.68 | -121.02 | 109.05 | 1.1134                    |
| IC        | H12F | C11F | *C12F | H12G | 1.1134 | 109.05 | -117.34 | 109.20 | 1.1131                    |
| IC        | C11F | C12F | C13F  | C14F | 1.5343 | 112.68 | -179.93 | 112.45 | 1.5345                    |
| IC        | C14F | C12F | *C13F | H13F | 1.5345 | 112.45 | -121.60 | 109.42 | 1.1129                    |
| IC        | H13F | C12F | *C13F | H13G | 1.1129 | 109.42 | -117.40 | 108.85 | 1.1134                    |
| IC        | C12F | C13F | C14F  | C15F | 1.5340 | 112.45 | 175.93  | 112.68 | 1.5334                    |
| IC        | C15F | C13F | *C14F | H14F | 1.5334 | 112.68 | -121.00 | 109.06 | 1.1131                    |
| IC        | H14F | C13F | *C14F | H14G | 1.1131 | 109.06 | -117.24 | 109.28 | 1.1130                    |
| IC        | C13F | C14F | C15F  | C16F | 1.5345 | 112.68 | -178.23 | 113.16 | 1.5306                    |
| IC        | C16F | C14F | *C15F | H15F | 1.5306 | 113.16 | -121.86 | 108.84 | 1.1140                    |
| IC        | H15F | C14F | *C15F | H15G | 1.1140 | 108.84 | -116.70 | 108.76 | 1.1144                    |
| IC        | C14F | C15F | C16F  | H16F | 1.5334 | 113.16 | -59.91  | 110.49 | 1.1113                    |
| IC        | H16F | C15F | *C16F | H16G | 1.1113 | 110.49 | 119.86  | 110.41 | 1.1115                    |
| IC        | H16F | C15F | *C16F | H16H | 1.1113 | 110.49 | -120.11 | 110.63 | 1.1112                    |
| IC        | C4S  | C2S  | *C3S  | O3   | 1.5009 | 110.14 | 118.36  | 109.80 | 1.4235 ! OH chirality (ch |
| IC        | C4S  | C2S  | *C3S  | H3S  | 1.5009 | 110.14 | -121.14 | 110.10 | 1.1140 ! OH chirality (ch |
| IC        | O11  | C1S  | C2S   | C3S  | 1.4327 | 111.21 | 175.67  | 114.25 | 1.5343 ! assume ok        |
| IC        | C1F  | C2S  | *NF   | HNF  | 1.3364 | 124.85 | -157.81 | 113.39 | 1.0062 ! assume ok        |
| ! IC      | C1S  | C2S  | C3S   | C4S  | 1.5586 | 114.25 | -70.50  | 110.14 | 1.5009! assume redundant  |
| ! SWAPPED |      |      |       |      |        |        |         |        |                           |
| IC        | C4S  | C3S  | C2S   | C1S  | 1.5009 | 110.14 | 160.94  | 114.25 | 1.5586                    |
| IC        | C1S  | C2S  | NF    | C1F  | 1.5586 | 111.52 | -70.50  | 124.85 | 1.3364                    |
| ! SWAPPED |      |      |       |      |        |        |         |        |                           |
| IC        | C3S  | C1S  | *C2S  | NF   | 1.5343 | 114.25 | 120.00  | 111.52 | 1.4406                    |
| IC        | C3S  | C1S  | *C2S  | H2S  | 1.5343 | 114.25 | -120.00 | 105.03 | 1.1194                    |

PATCH FIRST NONE LAST NONE

RESI SSM 0.00 ! sphingomyelin d18:1/18:0

GROUP !

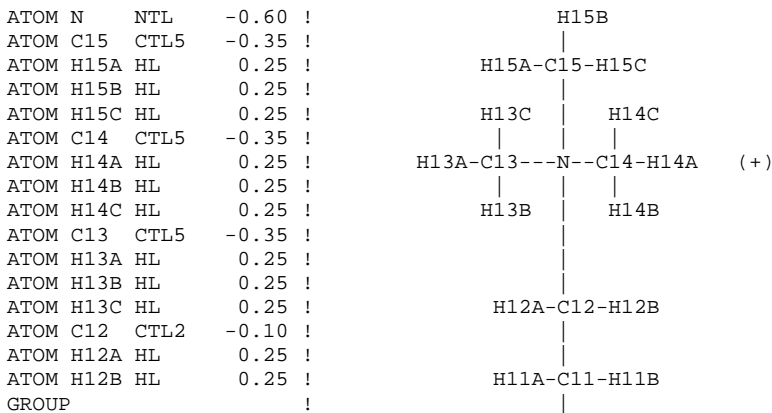



```

GROUP
ATOM C17S CTL2 -0.18 !
ATOM H17S HAL2 0.09 !
ATOM H17T HAL2 0.09 !
GROUP !
ATOM C18S CTL3 -0.27 !
ATOM H18S HAL3 0.09 !
ATOM H18T HAL3 0.09 !
ATOM H18U HAL3 0.09 !
GROUP !FATTY ACID CHAIN
ATOM C1F C 0.55 !
ATOM OF O -0.60 !
ATOM C2F CTL2 -0.07 !
ATOM H2F HAL2 0.06 !
ATOM H2G HAL2 0.06 !
GROUP !
ATOM C3F CTL2 -0.18 !
ATOM H3F HAL2 0.09 !
ATOM H3G HAL2 0.09 !
GROUP !
ATOM C4F CTL2 -0.18 !
ATOM H4F HAL2 0.09 !
ATOM H4G HAL2 0.09 !
GROUP !
ATOM C5F CTL2 -0.18 !
ATOM H5F HAL2 0.09 !
ATOM H5G HAL2 0.09 !
GROUP !
ATOM C6F CTL2 -0.18 !
ATOM H6F HAL2 0.09 !
ATOM H6G HAL2 0.09 !
GROUP !
ATOM C7F CTL2 -0.18 !
ATOM H7F HAL2 0.09 !
ATOM H7G HAL2 0.09 !
GROUP !
ATOM C8F CTL2 -0.18 !
ATOM H8F HAL2 0.09 !
ATOM H8G HAL2 0.09 !
GROUP !
ATOM C9F CTL2 -0.18 !
ATOM H9F HAL2 0.09 !
ATOM H9G HAL2 0.09 !
GROUP !
ATOM C10F CTL2 -0.18 !
ATOM H10F HAL2 0.09 !
ATOM H10G HAL2 0.09 !
GROUP !
ATOM C11F CTL2 -0.18 !
ATOM H11F HAL2 0.09 !
ATOM H11G HAL2 0.09 !
GROUP !
ATOM C12F CTL2 -0.18 !
ATOM H12F HAL2 0.09 !
ATOM H12G HAL2 0.09 !
GROUP !
ATOM C13F CTL2 -0.18 !
ATOM H13F HAL2 0.09 !
ATOM H13G HAL2 0.09 !
GROUP !
ATOM C14F CTL2 -0.18 !
ATOM H14F HAL2 0.09 !
ATOM H14G HAL2 0.09 !
GROUP !
ATOM C15F CTL2 -0.18 !
ATOM H15F HAL2 0.09 !
ATOM H15G HAL2 0.09 !
GROUP !
ATOM C16F CTL2 -0.18 !
ATOM H16F HAL2 0.09 !
ATOM H16G HAL2 0.09 !

```



GROUP !  
 ATOM C17F CTL2 -0.18 !  
 ATOM H17F HAL2 0.09 !  
 ATOM H17G HAL2 0.09 !  
 GROUP !  
 ATOM C18F CTL3 -0.27 !  
 ATOM H18F HAL3 0.09 !  
 ATOM H18G HAL3 0.09 !  
 ATOM H18H HAL3 0.09 !

!SPHINGOSINE CHAIN

BOND C18S H18S C18S H18T C18S H18U  
 BOND C18S C17S C17S H17S C17S H17T  
 BOND C17S C16S C16S H16S C16S H16T  
 BOND C16S C15S C15S H15S C15S H15T  
 BOND C15S C14S C14S H14S C14S H14T  
 BOND C14S C13S C13S H13S C13S H13T  
 BOND C13S C12S C12S H12S C12S H12T  
 BOND C12S C11S C11S H11S C11S H11T  
 BOND C11S C10S C10S H10S C10S H10T  
 BOND C10S C9S C9S H9S C9S H9T  
 BOND C9S C8S C8S H8S C8S H8T  
 BOND C8S C7S C7S H7S C7S H7T  
 BOND C7S C6S C6S H6S C6S H6T  
 BOND C6S C5S C5S H5S C4S H4S  
 BOND C4S C3S C3S H3S C3S O3  
 BOND O3 HO3  
 BOND C3S C2S C2S H2S  
 BOND C2S C1S C1S H1S C1S H1T  
 BOND C1S O11

!PHOSLPHOCHOLINE

BOND O11 P O12 P O13 P O14 P  
 BOND O12 C11 C11 H11A C11 H11B  
 BOND C11 C12 C12 H12A C12 H12B  
 BOND C12 N N C13 N C14 N C15  
 BOND C13 H13A C13 H13B C13 H13C  
 BOND C14 H14A C14 H14B C14 H14C  
 BOND C15 H15A C15 H15B C15 H15C

!FATTY ACID CHAIN

BOND C2S NF NF HNF NF C1F  
 BOND C1F C2F C2F H2F C2F H2G  
 BOND C2F C3F C3F H3F C3F H3G  
 BOND C3F C4F C4F H4F C4F H4G  
 BOND C4F C5F C5F H5F C5F H5G  
 BOND C5F C6F C6F H6F C6F H6G  
 BOND C6F C7F C7F H7F C7F H7G  
 BOND C7F C8F C8F H8F C8F H8G  
 BOND C8F C9F C9F H9F C9F H9G  
 BOND C9F C10F C10F H10F C10F H10G  
 BOND C10F C11F C11F H11F C11F H11G  
 BOND C11F C12F C12F H12F C12F H12G  
 BOND C12F C13F C13F H13F C13F H13G  
 BOND C13F C14F C14F H14F C14F H14G  
 BOND C14F C15F C15F H15F C15F H15G  
 BOND C15F C16F C16F H16F C16F H16G  
 BOND C16F C17F C17F H17F C17F H17G  
 BOND C17F C18F C18F H18F C18F H18G  
 BOND C18F H18H

DOUBLE C4S C5S  
 DOUBLE C1F OF  
 IMPR C1F C2F NF OF NF C1F C2S HNF

|    |      |     |      |      |        |        |         |        |        |
|----|------|-----|------|------|--------|--------|---------|--------|--------|
| IC | C13  | C12 | *N   | C14  | 1.4967 | 109.68 | 116.91  | 107.30 | 1.5040 |
| IC | C13  | C12 | *N   | C15  | 1.4967 | 109.68 | -123.42 | 110.88 | 1.4938 |
| IC | C12  | N   | C15  | H15A | 1.5212 | 110.88 | -177.15 | 111.31 | 1.0816 |
| IC | H15A | N   | *C15 | H15B | 1.0816 | 111.31 | 118.98  | 109.44 | 1.0875 |
| IC | H15A | N   | *C15 | H15C | 1.0816 | 111.31 | -122.11 | 111.46 | 1.0818 |
| IC | C12  | N   | C14  | H14A | 1.5212 | 107.30 | -178.89 | 114.23 | 1.0739 |
| IC | H14A | N   | *C14 | H14B | 1.0739 | 114.23 | 123.44  | 110.21 | 1.0968 |
| IC | H14A | N   | *C14 | H14C | 1.0739 | 114.23 | -124.43 | 111.41 | 1.0948 |

|    |      |      |       |      |        |        |         |        |        |
|----|------|------|-------|------|--------|--------|---------|--------|--------|
| IC | C12  | N    | C13   | H13A | 1.5212 | 109.68 | 176.44  | 111.15 | 1.0822 |
| IC | H13A | N    | *C13  | H13B | 1.0822 | 111.15 | 121.89  | 111.75 | 1.0814 |
| IC | H13A | N    | *C13  | H13C | 1.0822 | 111.15 | -118.50 | 109.57 | 1.0892 |
| IC | C13  | N    | C12   | C11  | 1.4967 | 109.68 | -178.83 | 116.30 | 1.5392 |
| IC | C11  | N    | *C12  | H12A | 1.5392 | 116.30 | 117.04  | 108.30 | 1.0985 |
| IC | C11  | N    | *C12  | H12B | 1.5392 | 116.30 | -126.61 | 112.36 | 1.0787 |
| IC | N    | C12  | C11   | O12  | 1.5212 | 116.30 | 126.79  | 107.85 | 1.4239 |
| IC | O12  | C12  | *C11  | H11A | 1.4239 | 107.85 | 118.10  | 109.30 | 1.1131 |
| IC | O12  | C12  | *C11  | H11B | 1.4239 | 107.85 | -123.12 | 113.16 | 1.1140 |
| IC | C12  | C11  | O12   | P    | 1.5392 | 107.85 | -68.29  | 118.09 | 1.5886 |
| IC | C11  | O12  | P     | O11  | 1.4239 | 118.09 | -167.58 | 104.18 | 1.5725 |
| IC | O11  | O12  | *P    | O13  | 1.5725 | 104.18 | 116.57  | 107.05 | 1.4823 |
| IC | O11  | O12  | *P    | O14  | 1.5725 | 104.18 | -118.73 | 106.98 | 1.4805 |
| IC | O12  | P    | O11   | C1S  | 1.5886 | 104.18 | 51.85   | 121.69 | 1.4327 |
| IC | P    | O11  | C1S   | C2S  | 1.5725 | 121.69 | 103.66  | 111.21 | 1.5586 |
| IC | C2S  | O11  | *C1S  | H1S  | 1.5586 | 111.21 | 118.79  | 108.35 | 1.1121 |
| IC | C2S  | O11  | *C1S  | H1T  | 1.5586 | 111.21 | -123.25 | 112.85 | 1.1152 |
| IC | O11  | C1S  | C2S   | C3S  | 1.4327 | 111.21 | 175.67  | 114.25 | 1.5343 |
| IC | C3S  | C1S  | *C2S  | NF   | 1.5343 | 114.25 | 120.00  | 111.52 | 1.4406 |
| IC | C3S  | C1S  | *C2S  | H2S  | 1.5343 | 114.25 | -120.00 | 105.03 | 1.1194 |
| IC | C1S  | C2S  | NF    | C1F  | 1.5586 | 111.52 | 160.94  | 124.85 | 1.3364 |
| IC | C1F  | C2S  | *NF   | HNF  | 1.3364 | 124.85 | -157.81 | 113.39 | 1.0062 |
| IC | C1S  | C2S  | C3S   | C4S  | 1.5586 | 114.25 | 170.50  | 110.14 | 1.5009 |
| IC | C4S  | C2S  | *C3S  | O3   | 1.5009 | 110.14 | 118.36  | 109.80 | 1.4235 |
| IC | C4S  | C2S  | *C3S  | H3S  | 1.5009 | 110.14 | -121.14 | 110.10 | 1.1140 |
| IC | C2S  | C3S  | O3    | HO3  | 1.5343 | 109.80 | 46.50   | 104.54 | 0.9610 |
| IC | C2S  | C3S  | C4S   | C5S  | 1.5343 | 110.14 | -84.24  | 124.28 | 1.3444 |
| IC | C5S  | C3S  | *C4S  | H4S  | 1.3444 | 124.28 | 178.79  | 115.93 | 1.1003 |
| IC | C3S  | C4S  | C5S   | C6S  | 1.5009 | 124.28 | 179.01  | 124.77 | 1.5077 |
| IC | C6S  | C4S  | *C5S  | H5S  | 1.5077 | 124.77 | -178.18 | 119.00 | 1.1029 |
| IC | C4S  | C5S  | C6S   | C7S  | 1.3444 | 124.77 | -117.13 | 111.46 | 1.5391 |
| IC | C7S  | C5S  | *C6S  | H6S  | 1.5391 | 111.46 | 120.98  | 111.41 | 1.1142 |
| IC | C7S  | C5S  | *C6S  | H6T  | 1.5391 | 111.46 | -120.60 | 109.91 | 1.1125 |
| IC | C5S  | C6S  | C7S   | C8S  | 1.5077 | 111.46 | -179.61 | 112.41 | 1.5354 |
| IC | C8S  | C6S  | *C7S  | H7S  | 1.5354 | 112.41 | 121.26  | 109.74 | 1.1138 |
| IC | C8S  | C6S  | *C7S  | H7T  | 1.5354 | 112.41 | -120.99 | 109.40 | 1.1147 |
| IC | C6S  | C7S  | C8S   | C9S  | 1.5391 | 112.41 | -179.79 | 112.50 | 1.5345 |
| IC | C9S  | C7S  | *C8S  | H8S  | 1.5345 | 112.50 | 121.20  | 108.97 | 1.1132 |
| IC | C9S  | C7S  | *C8S  | H8T  | 1.5345 | 112.50 | -121.38 | 109.07 | 1.1129 |
| IC | C7S  | C8S  | C9S   | C10S | 1.5354 | 112.50 | -179.89 | 112.66 | 1.5344 |
| IC | C10S | C8S  | *C9S  | H9S  | 1.5344 | 112.66 | 121.49  | 109.05 | 1.1133 |
| IC | C10S | C8S  | *C9S  | H9T  | 1.5344 | 112.66 | -121.38 | 108.96 | 1.1136 |
| IC | C8S  | C9S  | C10S  | C11S | 1.5345 | 112.66 | -179.87 | 112.54 | 1.5345 |
| IC | C11S | C9S  | *C10S | H10S | 1.5345 | 112.54 | 121.27  | 109.07 | 1.1133 |
| IC | C11S | C9S  | *C10S | H10T | 1.5345 | 112.54 | -121.34 | 109.11 | 1.1132 |
| IC | C9S  | C10S | C11S  | C12S | 1.5344 | 112.54 | 179.97  | 112.61 | 1.5344 |
| IC | C12S | C10S | *C11S | H11S | 1.5344 | 112.61 | 121.36  | 109.09 | 1.1133 |
| IC | C12S | C10S | *C11S | H11T | 1.5344 | 112.61 | -121.33 | 109.07 | 1.1134 |
| IC | C10S | C11S | C12S  | C13S | 1.5345 | 112.61 | -179.96 | 112.58 | 1.5345 |
| IC | C13S | C11S | *C12S | H12S | 1.5345 | 112.58 | 121.29  | 109.12 | 1.1133 |
| IC | C13S | C11S | *C12S | H12T | 1.5345 | 112.58 | -121.31 | 109.15 | 1.1133 |
| IC | C11S | C12S | C13S  | C14S | 1.5344 | 112.58 | 179.97  | 112.58 | 1.5345 |
| IC | C14S | C12S | *C13S | H13S | 1.5345 | 112.58 | 121.30  | 109.13 | 1.1133 |
| IC | C14S | C12S | *C13S | H13T | 1.5345 | 112.58 | -121.30 | 109.13 | 1.1133 |
| IC | C12S | C13S | C14S  | C15S | 1.5345 | 112.58 | -179.99 | 112.58 | 1.5345 |
| IC | C15S | C13S | *C14S | H14S | 1.5345 | 112.58 | 121.30  | 109.12 | 1.1133 |
| IC | C15S | C13S | *C14S | H14T | 1.5345 | 112.58 | -121.31 | 109.12 | 1.1133 |
| IC | C13S | C14S | C15S  | C16S | 1.5345 | 112.58 | 180.00  | 112.58 | 1.5346 |
| IC | C16S | C14S | *C15S | H15S | 1.5346 | 112.58 | 121.30  | 109.11 | 1.1133 |
| IC | C16S | C14S | *C15S | H15T | 1.5346 | 112.58 | -121.30 | 109.11 | 1.1133 |
| IC | C14S | C15S | C16S  | C17S | 1.5345 | 112.58 | 180.00  | 112.64 | 1.5337 |
| IC | C17S | C15S | *C16S | H16S | 1.5337 | 112.64 | 121.32  | 109.14 | 1.1133 |
| IC | C17S | C15S | *C16S | H16T | 1.5337 | 112.64 | -121.32 | 109.14 | 1.1133 |
| IC | C15S | C16S | C17S  | C18S | 1.5346 | 112.64 | 180.00  | 113.23 | 1.5309 |
| IC | C18S | C16S | *C17S | H17S | 1.5309 | 113.23 | 121.67  | 108.77 | 1.1142 |
| IC | C18S | C16S | *C17S | H17T | 1.5309 | 113.23 | -121.67 | 108.77 | 1.1142 |
| IC | C16S | C17S | C18S  | H18S | 1.5337 | 113.23 | 180.00  | 110.63 | 1.1113 |
| IC | H18S | C17S | *C18S | H18T | 1.1113 | 110.63 | 120.07  | 110.47 | 1.1114 |
| IC | H18S | C17S | *C18S | H18U | 1.1113 | 110.63 | -120.07 | 110.47 | 1.1114 |
| IC | C2S  | NF   | C1F   | C2F  | 1.4406 | 124.85 | -156.83 | 114.97 | 1.4964 |
| IC | C2F  | NF   | *C1F  | OF   | 1.4964 | 114.97 | 162.54  | 122.11 | 1.2268 |

|    |      |      |       |      |        |        |         |        |        |
|----|------|------|-------|------|--------|--------|---------|--------|--------|
| IC | NF   | C1F  | C2F   | C3F  | 1.3364 | 114.97 | 146.57  | 111.92 | 1.5432 |
| IC | C3F  | C1F  | *C2F  | H2F  | 1.5432 | 111.92 | -120.83 | 107.93 | 1.1115 |
| IC | H2F  | C1F  | *C2F  | H2G  | 1.1115 | 107.93 | -117.30 | 109.04 | 1.1113 |
| IC | C1F  | C2F  | C3F   | C4F  | 1.4964 | 111.92 | 59.54   | 112.84 | 1.5310 |
| IC | C4F  | C2F  | *C3F  | H3F  | 1.5310 | 112.84 | -121.63 | 109.37 | 1.1145 |
| IC | H3F  | C2F  | *C3F  | H3G  | 1.1145 | 109.37 | -117.07 | 109.08 | 1.1157 |
| IC | C2F  | C3F  | C4F   | C5F  | 1.5434 | 112.23 | 174.86  | 112.58 | 1.5342 |
| IC | C5F  | C3F  | *C4F  | H4F  | 1.5342 | 112.58 | -120.18 | 108.65 | 1.1140 |
| IC | H4F  | C3F  | *C4F  | H4G  | 1.1140 | 108.65 | -117.52 | 109.62 | 1.1127 |
| IC | C3F  | C4F  | C5F   | C6F  | 1.5340 | 112.58 | -174.06 | 112.39 | 1.5340 |
| IC | C6F  | C4F  | *C5F  | H5F  | 1.5340 | 112.39 | -122.01 | 109.38 | 1.1130 |
| IC | H5F  | C4F  | *C5F  | H5G  | 1.1130 | 109.38 | -117.34 | 108.92 | 1.1134 |
| IC | C4F  | C5F  | C6F   | C7F  | 1.5342 | 112.39 | 178.27  | 112.75 | 1.5340 |
| IC | C7F  | C5F  | *C6F  | H6F  | 1.5340 | 112.75 | -120.93 | 108.96 | 1.1137 |
| IC | H6F  | C5F  | *C6F  | H6G  | 1.1137 | 108.96 | -117.41 | 109.22 | 1.1131 |
| IC | C5F  | C6F  | C7F   | C8F  | 1.5340 | 112.75 | -178.89 | 112.33 | 1.5342 |
| IC | C8F  | C6F  | *C7F  | H7F  | 1.5342 | 112.33 | -121.40 | 109.26 | 1.1132 |
| IC | H7F  | C6F  | *C7F  | H7G  | 1.1132 | 109.26 | -117.45 | 109.12 | 1.1130 |
| IC | C6F  | C7F  | C8F   | C9F  | 1.5340 | 112.33 | 179.09  | 112.77 | 1.5340 |
| IC | C9F  | C7F  | *C8F  | H8F  | 1.5340 | 112.77 | -121.23 | 109.16 | 1.1134 |
| IC | H8F  | C7F  | *C8F  | H8G  | 1.1134 | 109.16 | -117.38 | 109.08 | 1.1133 |
| IC | C7F  | C8F  | C9F   | C10F | 1.5342 | 112.77 | 179.02  | 112.34 | 1.5343 |
| IC | C10F | C8F  | *C9F  | H9F  | 1.5343 | 112.34 | -121.27 | 109.27 | 1.1132 |
| IC | H9F  | C8F  | *C9F  | H9G  | 1.1132 | 109.27 | -117.45 | 109.10 | 1.1130 |
| IC | C8F  | C9F  | C10F  | C11F | 1.5340 | 112.34 | 178.16  | 112.74 | 1.5340 |
| IC | C11F | C9F  | *C10F | H10F | 1.5340 | 112.74 | -121.18 | 109.16 | 1.1134 |
| IC | H10F | C9F  | *C10F | H10G | 1.1134 | 109.16 | -117.35 | 109.10 | 1.1132 |
| IC | C9F  | C10F | C11F  | C12F | 1.5343 | 112.74 | 178.91  | 112.38 | 1.5343 |
| IC | C12F | C10F | *C11F | H11F | 1.5343 | 112.38 | -121.39 | 109.34 | 1.1131 |
| IC | H11F | C10F | *C11F | H11G | 1.1131 | 109.34 | -117.43 | 108.98 | 1.1132 |
| IC | C10F | C11F | C12F  | C13F | 1.5340 | 112.38 | 176.93  | 112.68 | 1.5340 |
| IC | C13F | C11F | *C12F | H12F | 1.5340 | 112.68 | -121.02 | 109.05 | 1.1134 |
| IC | H12F | C11F | *C12F | H12G | 1.1134 | 109.05 | -117.34 | 109.20 | 1.1131 |
| IC | C11F | C12F | C13F  | C14F | 1.5343 | 112.68 | -179.93 | 112.45 | 1.5345 |
| IC | C14F | C12F | *C13F | H13F | 1.5345 | 112.45 | -121.60 | 109.42 | 1.1129 |
| IC | H13F | C12F | *C13F | H13G | 1.1129 | 109.42 | -117.40 | 108.85 | 1.1134 |
| IC | C12F | C13F | C14F  | C15F | 1.5340 | 112.45 | 175.93  | 112.68 | 1.5334 |
| IC | C15F | C13F | *C14F | H14F | 1.5334 | 112.68 | -121.00 | 109.06 | 1.1131 |
| IC | H14F | C13F | *C14F | H14G | 1.1131 | 109.06 | -117.24 | 109.28 | 1.1130 |
| IC | C13F | C14F | C15F  | C16F | 1.5345 | 112.68 | -178.23 | 113.16 | 1.5306 |
| IC | C16F | C14F | *C15F | H15F | 1.5306 | 113.16 | -121.86 | 108.84 | 1.1140 |
| IC | H15F | C14F | *C15F | H15G | 1.1140 | 108.84 | -116.70 | 108.76 | 1.1144 |
| IC | C14F | C15F | C16F  | C17F | 1.5345 | 112.68 | -178.23 | 113.16 | 1.5306 |
| IC | C17F | C15F | *C16F | H16F | 1.5306 | 113.16 | -121.86 | 108.84 | 1.1140 |
| IC | H16F | C15F | *C16F | H16G | 1.1140 | 108.84 | -116.70 | 108.76 | 1.1144 |
| IC | C15F | C16F | C17F  | C18F | 1.5345 | 112.68 | -178.23 | 113.16 | 1.5306 |
| IC | C18F | C16F | *C17F | H17F | 1.5306 | 113.16 | -121.86 | 108.84 | 1.1140 |
| IC | H17F | C16F | *C17F | H17G | 1.1140 | 108.84 | -116.70 | 108.76 | 1.1144 |
| IC | C16F | C17F | C18F  | H18F | 1.5334 | 113.16 | -59.91  | 110.49 | 1.1113 |
| IC | H18F | C17F | *C18F | H18G | 1.1113 | 110.49 | 119.86  | 110.41 | 1.1115 |
| IC | H18F | C17F | *C18F | H18H | 1.1113 | 110.49 | -120.11 | 110.63 | 1.1112 |

PATCH FIRST NONE LAST NONE

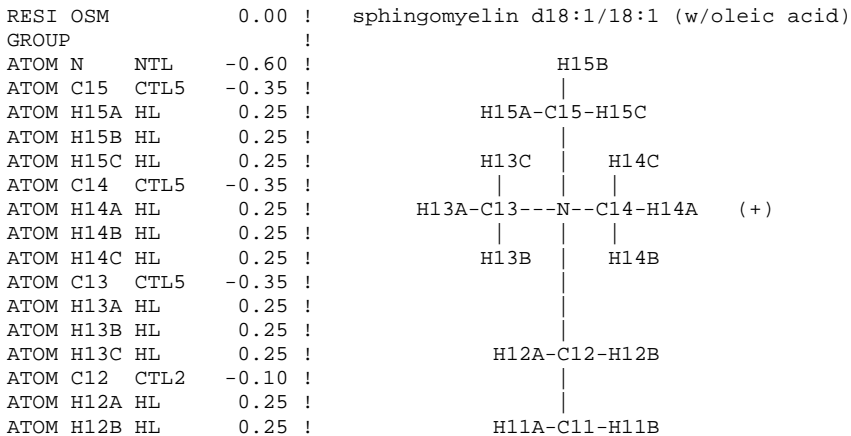



|           |      |       |                   |
|-----------|------|-------|-------------------|
| ATOM H16T | HAL2 | 0.09  | !                 |
| GROUP     |      |       |                   |
| ATOM C17S | CTL2 | -0.18 | !                 |
| ATOM H17S | HAL2 | 0.09  | !                 |
| ATOM H17T | HAL2 | 0.09  | !                 |
| GROUP     |      |       | !                 |
| ATOM C18S | CTL3 | -0.27 | !                 |
| ATOM H18S | HAL3 | 0.09  | !                 |
| ATOM H18T | HAL3 | 0.09  | !                 |
| ATOM H18U | HAL3 | 0.09  | !                 |
| GROUP     |      |       | !                 |
|           |      |       | !FATTY ACID CHAIN |
| ATOM C1F  | C    | 0.55  | !                 |
| ATOM OF   | O    | -0.60 | !                 |
| ATOM C2F  | CTL2 | -0.07 | !                 |
| ATOM H2F  | HAL2 | 0.06  | !                 |
| ATOM H2G  | HAL2 | 0.06  | !                 |
| GROUP     |      |       | !                 |
| ATOM C3F  | CTL2 | -0.18 | !                 |
| ATOM H3F  | HAL2 | 0.09  | !                 |
| ATOM H3G  | HAL2 | 0.09  | !                 |
| GROUP     |      |       | !                 |
| ATOM C4F  | CTL2 | -0.18 | !                 |
| ATOM H4F  | HAL2 | 0.09  | !                 |
| ATOM H4G  | HAL2 | 0.09  | !                 |
| GROUP     |      |       | !                 |
| ATOM C5F  | CTL2 | -0.18 | !                 |
| ATOM H5F  | HAL2 | 0.09  | !                 |
| ATOM H5G  | HAL2 | 0.09  | !                 |
| GROUP     |      |       | !                 |
| ATOM C6F  | CTL2 | -0.18 | !                 |
| ATOM H6F  | HAL2 | 0.09  | !                 |
| ATOM H6G  | HAL2 | 0.09  | !                 |
| GROUP     |      |       | !                 |
| ATOM C7F  | CTL2 | -0.18 | !                 |
| ATOM H7F  | HAL2 | 0.09  | !                 |
| ATOM H7G  | HAL2 | 0.09  | !                 |
| GROUP     |      |       | !                 |
| ATOM C8F  | CTL2 | -0.18 | !                 |
| ATOM H8F  | HAL2 | 0.09  | !                 |
| ATOM H8G  | HAL2 | 0.09  | !                 |
| GROUP     |      |       | !                 |
| ATOM C9F  | CEL1 | -0.15 | !                 |
| ATOM H9F  | HEL1 | 0.15  | !                 |
| GROUP     |      |       | !                 |
| ATOM C10F | CEL1 | -0.15 | !                 |
| ATOM H10F | HEL1 | 0.15  | !                 |
| GROUP     |      |       | !                 |
| ATOM C11F | CTL2 | -0.18 | !                 |
| ATOM H11F | HAL2 | 0.09  | !                 |
| ATOM H11G | HAL2 | 0.09  | !                 |
| GROUP     |      |       | !                 |
| ATOM C12F | CTL2 | -0.18 | !                 |
| ATOM H12F | HAL2 | 0.09  | !                 |
| ATOM H12G | HAL2 | 0.09  | !                 |
| GROUP     |      |       | !                 |
| ATOM C13F | CTL2 | -0.18 | !                 |
| ATOM H13F | HAL2 | 0.09  | !                 |
| ATOM H13G | HAL2 | 0.09  | !                 |
| GROUP     |      |       | !                 |
| ATOM C14F | CTL2 | -0.18 | !                 |
| ATOM H14F | HAL2 | 0.09  | !                 |
| ATOM H14G | HAL2 | 0.09  | !                 |
| GROUP     |      |       | !                 |
| ATOM C15F | CTL2 | -0.18 | !                 |
| ATOM H15F | HAL2 | 0.09  | !                 |
| ATOM H15G | HAL2 | 0.09  | !                 |
| GROUP     |      |       | !                 |
| ATOM C16F | CTL2 | -0.18 | !                 |
| ATOM H16F | HAL2 | 0.09  | !                 |
| ATOM H16G | HAL2 | 0.09  | !                 |
| GROUP     |      |       | !                 |

ATOM C17F CTL2 -0.18 !  
 ATOM H17F HAL2 0.09 !  
 ATOM H17G HAL2 0.09 !  
 GROUP !  
 ATOM C18F CTL3 -0.27 !  
 ATOM H18F HAL3 0.09 !  
 ATOM H18G HAL3 0.09 !  
 ATOM H18H HAL3 0.09 !

!SPHINGOSINE CHAIN

BOND C18S H18S C18S H18T C18S H18U  
 BOND C18S C17S C17S H17S C17S H17T  
 BOND C17S C16S C16S H16S C16S H16T  
 BOND C16S C15S C15S H15S C15S H15T  
 BOND C15S C14S C14S H14S C14S H14T  
 BOND C14S C13S C13S H13S C13S H13T  
 BOND C13S C12S C12S H12S C12S H12T  
 BOND C12S C11S C11S H11S C11S H11T  
 BOND C11S C10S C10S H10S C10S H10T  
 BOND C10S C9S C9S H9S C9S H9T  
 BOND C9S C8S C8S H8S C8S H8T  
 BOND C8S C7S C7S H7S C7S H7T  
 BOND C7S C6S C6S H6S C6S H6T  
 BOND C6S C5S C5S H5S C4S H4S  
 BOND C4S C3S C3S H3S C3S O3  
 BOND O3 HO3  
 BOND C3S C2S C2S H2S  
 BOND C2S C1S C1S H1S C1S H1T  
 BOND C1S O11

!PHOSLPHOCHOLINE

BOND O11 P O12 P O13 P O14 P  
 BOND O12 C11 C11 H11A C11 H11B  
 BOND C11 C12 C12 H12A C12 H12B  
 BOND C12 N N C13 N C14 N C15  
 BOND C13 H13A C13 H13B C13 H13C  
 BOND C14 H14A C14 H14B C14 H14C  
 BOND C15 H15A C15 H15B C15 H15C

!FATY ACID CHAIN

BOND C2S NF NF HNF NF C1F  
 BOND C1F C2F C2F H2F C2F H2G  
 BOND C2F C3F C3F H3F C3F H3G  
 BOND C3F C4F C4F H4F C4F H4G  
 BOND C4F C5F C5F H5F C5F H5G  
 BOND C5F C6F C6F H6F C6F H6G  
 BOND C6F C7F C7F H7F C7F H7G  
 BOND C7F C8F C8F H8F C8F H8G  
 BOND C8F C9F C9F H9F  
 BOND C10F H10F  
 BOND C10F C11F C11F H11F C11F H11G  
 BOND C11F C12F C12F H12F C12F H12G  
 BOND C12F C13F C13F H13F C13F H13G  
 BOND C13F C14F C14F H14F C14F H14G  
 BOND C14F C15F C15F H15F C15F H15G  
 BOND C15F C16F C16F H16F C16F H16G  
 BOND C16F C17F C17F H17F C17F H17G  
 BOND C17F C18F C18F H18F C18F H18G  
 BOND C18F H18H

DOUBLE C4S C5S

DOUBLE C9F C10F

DOUBLE C1F OF

IMPR C1F C2F NF OF NF C1F C2S HNF

|    |      |      |      |      |        |        |         |        |        |
|----|------|------|------|------|--------|--------|---------|--------|--------|
| IC | C18S | C17S | C16S | C15S | 1.5309 | 113.23 | 180.00  | 112.64 | 1.5346 |
| IC | C17S | C16S | C15S | C14S | 1.5337 | 112.64 | 180.00  | 112.58 | 1.5345 |
| IC | C16S | C15S | C14S | C13S | 1.5346 | 112.58 | 180.00  | 112.58 | 1.5345 |
| IC | C15S | C14S | C13S | C12S | 1.5345 | 112.58 | -179.99 | 112.58 | 1.5345 |
| IC | C14S | C13S | C12S | C11S | 1.5345 | 112.58 | 179.97  | 112.58 | 1.5344 |
| IC | C13S | C12S | C11S | C10S | 1.5345 | 112.58 | -179.96 | 112.61 | 1.5345 |
| IC | C12S | C11S | C10S | C9S  | 1.5344 | 112.61 | 179.97  | 112.54 | 1.5344 |
| IC | C11S | C10S | C9S  | C8S  | 1.5345 | 112.54 | -179.87 | 112.66 | 1.5345 |

|    |      |      |       |      |        |        |         |        |        |
|----|------|------|-------|------|--------|--------|---------|--------|--------|
| IC | C10S | C9S  | C8S   | C7S  | 1.5344 | 112.66 | -179.89 | 112.50 | 1.5354 |
| IC | C9S  | C8S  | C7S   | C6S  | 1.5345 | 112.50 | -179.79 | 112.41 | 1.5391 |
| IC | C8S  | C7S  | C6S   | C5S  | 1.5354 | 112.41 | -179.61 | 111.46 | 1.5077 |
| IC | C7S  | C6S  | C5S   | C4S  | 1.5391 | 111.46 | -117.13 | 124.77 | 1.3444 |
| IC | C6S  | C5S  | C4S   | C3S  | 1.5077 | 124.77 | 179.01  | 124.28 | 1.5009 |
| IC | C5S  | C4S  | C3S   | C2S  | 1.3444 | 124.28 | -84.24  | 110.14 | 1.5343 |
| IC | C5S  | C4S  | C3S   | O3   | 1.3444 | 124.28 | 156.07  | 107.64 | 1.4235 |
| IC | C4S  | C3S  | C2S   | C1S  | 1.5009 | 110.14 | -70.50  | 114.25 | 1.5586 |
| IC | C13  | C12  | *N    | C14  | 1.4967 | 109.68 | 116.91  | 107.30 | 1.5040 |
| IC | C13  | C12  | *N    | C15  | 1.4967 | 109.68 | -123.42 | 110.88 | 1.4938 |
| IC | C12  | N    | *C15  | H15A | 1.5212 | 110.88 | -177.15 | 111.31 | 1.0816 |
| IC | H15A | N    | *C15  | H15B | 1.0816 | 111.31 | 118.98  | 109.44 | 1.0875 |
| IC | H15A | N    | *C15  | H15C | 1.0816 | 111.31 | -122.11 | 111.46 | 1.0818 |
| IC | C12  | N    | C14   | H14A | 1.5212 | 107.30 | -178.89 | 114.23 | 1.0739 |
| IC | H14A | N    | *C14  | H14B | 1.0739 | 114.23 | 123.44  | 110.21 | 1.0968 |
| IC | H14A | N    | *C14  | H14C | 1.0739 | 114.23 | -124.43 | 111.41 | 1.0948 |
| IC | C12  | N    | C13   | H13A | 1.5212 | 109.68 | 176.44  | 111.15 | 1.0822 |
| IC | H13A | N    | *C13  | H13B | 1.0822 | 111.15 | 121.89  | 111.75 | 1.0814 |
| IC | H13A | N    | *C13  | H13C | 1.0822 | 111.15 | -118.50 | 109.57 | 1.0892 |
| IC | C13  | N    | C12   | C11  | 1.4967 | 109.68 | -178.83 | 116.30 | 1.5392 |
| IC | C11  | N    | *C12  | H12A | 1.5392 | 116.30 | 117.04  | 108.30 | 1.0985 |
| IC | C11  | N    | *C12  | H12B | 1.5392 | 116.30 | -126.61 | 112.36 | 1.0787 |
| IC | N    | C12  | C11   | O12  | 1.5212 | 116.30 | 126.79  | 107.85 | 1.4239 |
| IC | O12  | C12  | *C11  | H11A | 1.4239 | 107.85 | 118.10  | 109.30 | 1.1131 |
| IC | O12  | C12  | *C11  | H11B | 1.4239 | 107.85 | -123.12 | 113.16 | 1.1140 |
| IC | C12  | C11  | O12   | P    | 1.5392 | 107.85 | -68.29  | 118.09 | 1.5886 |
| IC | C11  | O12  | P     | O11  | 1.4239 | 118.09 | -167.58 | 104.18 | 1.5725 |
| IC | O11  | O12  | *P    | O13  | 1.5725 | 104.18 | 116.57  | 107.05 | 1.4823 |
| IC | O11  | O12  | *P    | O14  | 1.5725 | 104.18 | -118.73 | 106.98 | 1.4805 |
| IC | O12  | P    | O11   | C1S  | 1.5886 | 104.18 | 51.85   | 121.69 | 1.4327 |
| IC | P    | O11  | C1S   | C2S  | 1.5725 | 121.69 | 103.66  | 111.21 | 1.5586 |
| IC | C2S  | O11  | *C1S  | H1S  | 1.5586 | 111.21 | 118.79  | 108.35 | 1.1121 |
| IC | C2S  | O11  | *C1S  | H1T  | 1.5586 | 111.21 | -123.25 | 112.85 | 1.1152 |
| IC | O11  | C1S  | C2S   | C3S  | 1.4327 | 111.21 | 175.67  | 114.25 | 1.5343 |
| IC | C3S  | C1S  | *C2S  | NF   | 1.5343 | 114.25 | 120.00  | 111.52 | 1.4406 |
| IC | C3S  | C1S  | *C2S  | H2S  | 1.5343 | 114.25 | -120.00 | 105.03 | 1.1194 |
| IC | C1S  | C2S  | NF    | C1F  | 1.5586 | 111.52 | 160.94  | 124.85 | 1.3364 |
| IC | C1F  | C2S  | *NF   | HNF  | 1.3364 | 124.85 | -157.81 | 113.39 | 1.0062 |
| IC | C1S  | C2S  | C3S   | C4S  | 1.5586 | 114.25 | -70.50  | 110.14 | 1.5009 |
| IC | C4S  | C2S  | *C3S  | O3   | 1.5009 | 110.14 | 118.36  | 109.80 | 1.4235 |
| IC | C4S  | C2S  | *C3S  | H3S  | 1.5009 | 110.14 | -121.14 | 110.10 | 1.1140 |
| IC | C2S  | C3S  | O3    | HO3  | 1.5343 | 109.80 | 46.50   | 104.54 | 0.9610 |
| IC | C2S  | C3S  | C4S   | C5S  | 1.5343 | 110.14 | -84.24  | 124.28 | 1.3444 |
| IC | C5S  | C3S  | *C4S  | H4S  | 1.3444 | 124.28 | 178.79  | 115.93 | 1.1003 |
| IC | C3S  | C4S  | C5S   | C6S  | 1.5009 | 124.28 | 179.01  | 124.77 | 1.5077 |
| IC | C6S  | C4S  | *C5S  | H5S  | 1.5077 | 124.77 | -178.18 | 119.00 | 1.1029 |
| IC | C4S  | C5S  | C6S   | C7S  | 1.3444 | 124.77 | -117.13 | 111.46 | 1.5391 |
| IC | C7S  | C5S  | *C6S  | H6S  | 1.5391 | 111.46 | 120.98  | 111.41 | 1.1142 |
| IC | C7S  | C5S  | *C6S  | H6T  | 1.5391 | 111.46 | -120.60 | 109.91 | 1.1125 |
| IC | C5S  | C6S  | C7S   | C8S  | 1.5077 | 111.46 | -179.61 | 112.41 | 1.5354 |
| IC | C8S  | C6S  | *C7S  | H7S  | 1.5354 | 112.41 | 121.26  | 109.74 | 1.1138 |
| IC | C8S  | C6S  | *C7S  | H7T  | 1.5354 | 112.41 | -120.99 | 109.40 | 1.1147 |
| IC | C6S  | C7S  | C8S   | C9S  | 1.5391 | 112.41 | -179.79 | 112.50 | 1.5345 |
| IC | C9S  | C7S  | *C8S  | H8S  | 1.5345 | 112.50 | 121.20  | 108.97 | 1.1132 |
| IC | C9S  | C7S  | *C8S  | H8T  | 1.5345 | 112.50 | -121.38 | 109.07 | 1.1129 |
| IC | C7S  | C8S  | C9S   | C10S | 1.5354 | 112.50 | -179.89 | 112.66 | 1.5344 |
| IC | C10S | C8S  | *C9S  | H9S  | 1.5344 | 112.66 | 121.49  | 109.05 | 1.1133 |
| IC | C10S | C8S  | *C9S  | H9T  | 1.5344 | 112.66 | -121.38 | 108.96 | 1.1136 |
| IC | C8S  | C9S  | C10S  | C11S | 1.5345 | 112.66 | -179.87 | 112.54 | 1.5345 |
| IC | C11S | C9S  | *C10S | H10S | 1.5345 | 112.54 | 121.27  | 109.07 | 1.1133 |
| IC | C11S | C9S  | *C10S | H10T | 1.5345 | 112.54 | -121.34 | 109.11 | 1.1132 |
| IC | C9S  | C10S | C11S  | C12S | 1.5344 | 112.54 | 179.97  | 112.61 | 1.5344 |
| IC | C12S | C10S | *C11S | H11S | 1.5344 | 112.61 | 121.36  | 109.09 | 1.1133 |
| IC | C12S | C10S | *C11S | H11T | 1.5344 | 112.61 | -121.33 | 109.07 | 1.1134 |
| IC | C10S | C11S | C12S  | C13S | 1.5345 | 112.61 | -179.96 | 112.58 | 1.5345 |
| IC | C13S | C11S | *C12S | H12S | 1.5345 | 112.58 | 121.29  | 109.12 | 1.1133 |
| IC | C13S | C11S | *C12S | H12T | 1.5345 | 112.58 | -121.31 | 109.15 | 1.1133 |
| IC | C11S | C12S | C13S  | C14S | 1.5344 | 112.58 | 179.97  | 112.58 | 1.5345 |
| IC | C14S | C12S | *C13S | H13S | 1.5345 | 112.58 | 121.30  | 109.13 | 1.1133 |
| IC | C14S | C12S | *C13S | H13T | 1.5345 | 112.58 | -121.30 | 109.13 | 1.1133 |
| IC | C12S | C13S | C14S  | C15S | 1.5345 | 112.58 | -179.99 | 112.58 | 1.5345 |

|    |      |      |       |      |        |        |         |        |        |
|----|------|------|-------|------|--------|--------|---------|--------|--------|
| IC | C15S | C13S | *C14S | H14S | 1.5345 | 112.58 | 121.30  | 109.12 | 1.1133 |
| IC | C15S | C13S | *C14S | H14T | 1.5345 | 112.58 | -121.31 | 109.12 | 1.1133 |
| IC | C13S | C14S | C15S  | C16S | 1.5345 | 112.58 | 180.00  | 112.58 | 1.5346 |
| IC | C16S | C14S | *C15S | H15S | 1.5346 | 112.58 | 121.30  | 109.11 | 1.1133 |
| IC | C16S | C14S | *C15S | H15T | 1.5346 | 112.58 | -121.30 | 109.11 | 1.1133 |
| IC | C14S | C15S | C16S  | C17S | 1.5345 | 112.58 | 180.00  | 112.64 | 1.5337 |
| IC | C17S | C15S | *C16S | H16S | 1.5337 | 112.64 | 121.32  | 109.14 | 1.1133 |
| IC | C17S | C15S | *C16S | H16T | 1.5337 | 112.64 | -121.32 | 109.14 | 1.1133 |
| IC | C15S | C16S | C17S  | C18S | 1.5346 | 112.64 | 180.00  | 113.23 | 1.5309 |
| IC | C18S | C16S | *C17S | H17S | 1.5309 | 113.23 | 121.67  | 108.77 | 1.1142 |
| IC | C18S | C16S | *C17S | H17T | 1.5309 | 113.23 | -121.67 | 108.77 | 1.1142 |
| IC | C16S | C17S | C18S  | H18S | 1.5337 | 113.23 | 180.00  | 110.63 | 1.1113 |
| IC | H18S | C17S | *C18S | H18T | 1.1113 | 110.63 | 120.07  | 110.47 | 1.1114 |
| IC | H18S | C17S | *C18S | H18U | 1.1113 | 110.63 | -120.07 | 110.47 | 1.1114 |
| IC | C2S  | NF   | C1F   | C2F  | 1.4406 | 124.85 | -156.83 | 114.97 | 1.4964 |
| IC | C2F  | NF   | *C1F  | OF   | 1.4964 | 114.97 | 162.54  | 122.11 | 1.2268 |
| IC | NF   | C1F  | C2F   | C3F  | 1.3364 | 114.97 | -146.57 | 111.92 | 1.5432 |
| IC | C3F  | C1F  | *C2F  | H2F  | 1.5432 | 111.92 | -120.83 | 107.93 | 1.1115 |
| IC | H2F  | C1F  | *C2F  | H2G  | 1.1115 | 107.93 | -117.30 | 109.04 | 1.1113 |
| IC | C1F  | C2F  | C3F   | C4F  | 1.4964 | 111.92 | 179.54  | 112.84 | 1.5310 |
| IC | C4F  | C2F  | *C3F  | H3F  | 1.5310 | 112.84 | -121.63 | 109.37 | 1.1145 |
| IC | H3F  | C2F  | *C3F  | H3G  | 1.1145 | 109.37 | -117.07 | 109.08 | 1.1157 |
| IC | C2F  | C3F  | C4F   | C5F  | 1.5434 | 112.23 | 174.86  | 112.58 | 1.5342 |
| IC | C5F  | C3F  | *C4F  | H4F  | 1.5342 | 112.58 | -120.18 | 108.65 | 1.1140 |
| IC | H4F  | C3F  | *C4F  | H4G  | 1.1140 | 108.65 | -117.52 | 109.62 | 1.1127 |
| IC | C3F  | C4F  | C5F   | C6F  | 1.5340 | 112.58 | -174.06 | 112.39 | 1.5340 |
| IC | C6F  | C4F  | *C5F  | H5F  | 1.5340 | 112.39 | -122.01 | 109.38 | 1.1130 |
| IC | H5F  | C4F  | *C5F  | H5G  | 1.1130 | 109.38 | -117.34 | 108.92 | 1.1134 |
| IC | C4F  | C5F  | C6F   | C7F  | 1.5342 | 112.39 | 178.27  | 112.75 | 1.5340 |
| IC | C7F  | C5F  | *C6F  | H6F  | 1.5340 | 112.75 | -120.93 | 108.96 | 1.1137 |
| IC | H6F  | C5F  | *C6F  | H6G  | 1.1137 | 108.96 | -117.41 | 109.22 | 1.1131 |
| IC | C5F  | C6F  | C7F   | C8F  | 1.5340 | 112.75 | -178.89 | 112.33 | 1.5342 |
| IC | C8F  | C6F  | *C7F  | H7F  | 1.5342 | 112.33 | -121.40 | 109.26 | 1.1132 |
| IC | H7F  | C6F  | *C7F  | H7G  | 1.1132 | 109.26 | -117.45 | 109.12 | 1.1130 |
| IC | C6F  | C7F  | C8F   | C9F  | 1.5340 | 112.33 | 179.09  | 112.77 | 1.5340 |
| IC | C9F  | C7F  | *C8F  | H8F  | 1.5340 | 112.77 | -121.23 | 109.16 | 1.1134 |
| IC | H8F  | C7F  | *C8F  | H8G  | 1.1134 | 109.16 | -117.38 | 109.08 | 1.1133 |
| IC | C7F  | C8F  | C9F   | C10F | 1.5342 | 112.77 | 179.02  | 112.34 | 1.5343 |
| IC | C10F | C8F  | *C9F  | H9F  | 1.5343 | 112.34 | -121.27 | 109.27 | 1.1132 |
| IC | C8F  | C9F  | C10F  | C11F | 1.5340 | 112.34 | 0.00    | 112.74 | 1.5340 |
| IC | C11F | C9F  | *C10F | H10F | 1.5340 | 112.74 | -121.18 | 109.16 | 1.1134 |
| IC | C9F  | C10F | C11F  | C12F | 1.5343 | 112.74 | 180.00  | 112.38 | 1.5343 |
| IC | C12F | C10F | *C11F | H11F | 1.5343 | 112.38 | -121.39 | 109.34 | 1.1131 |
| IC | H11F | C10F | *C11F | H11G | 1.1131 | 109.34 | -117.43 | 108.98 | 1.1132 |
| IC | C10F | C11F | C12F  | C13F | 1.5340 | 112.38 | 0.00    | 112.68 | 1.5340 |
| IC | C13F | C11F | *C12F | H12F | 1.5340 | 112.68 | -121.02 | 109.05 | 1.1134 |
| IC | H12F | C11F | *C12F | H12G | 1.1134 | 109.05 | -117.34 | 109.20 | 1.1131 |
| IC | C11F | C12F | C13F  | C14F | 1.5343 | 112.68 | -179.93 | 112.45 | 1.5345 |
| IC | C14F | C12F | *C13F | H13F | 1.5345 | 112.45 | -121.60 | 109.42 | 1.1129 |
| IC | H13F | C12F | *C13F | H13G | 1.1129 | 109.42 | -117.40 | 108.85 | 1.1134 |
| IC | C12F | C13F | C14F  | C15F | 1.5340 | 112.45 | 175.93  | 112.68 | 1.5334 |
| IC | C15F | C13F | *C14F | H14F | 1.5334 | 112.68 | -121.00 | 109.06 | 1.1131 |
| IC | H14F | C13F | *C14F | H14G | 1.1131 | 109.06 | -117.24 | 109.28 | 1.1130 |
| IC | C13F | C14F | C15F  | C16F | 1.5345 | 112.68 | -178.23 | 113.16 | 1.5306 |
| IC | C16F | C14F | *C15F | H15F | 1.5306 | 113.16 | -121.86 | 108.84 | 1.1140 |
| IC | H15F | C14F | *C15F | H15G | 1.1140 | 108.84 | -116.70 | 108.76 | 1.1144 |
| IC | C14F | C15F | C16F  | C17F | 1.5345 | 112.68 | -178.23 | 113.16 | 1.5306 |
| IC | C17F | C15F | *C16F | H16F | 1.5306 | 113.16 | -121.86 | 108.84 | 1.1140 |
| IC | H16F | C15F | *C16F | H16G | 1.1140 | 108.84 | -116.70 | 108.76 | 1.1144 |
| IC | C15F | C16F | C17F  | C18F | 1.5345 | 112.68 | -178.23 | 113.16 | 1.5306 |
| IC | C18F | C16F | *C17F | H17F | 1.5306 | 113.16 | -121.86 | 108.84 | 1.1140 |
| IC | H17F | C16F | *C17F | H17G | 1.1140 | 108.84 | -116.70 | 108.76 | 1.1144 |
| IC | C16F | C17F | C18F  | H18F | 1.5334 | 113.16 | -59.91  | 110.49 | 1.1113 |
| IC | H18F | C17F | *C18F | H18G | 1.1113 | 110.49 | 119.86  | 110.41 | 1.1115 |
| IC | H18F | C17F | *C18F | H18H | 1.1113 | 110.49 | -120.11 | 110.63 | 1.1112 |

PATCH FIRST NONE LAST NONE

```
RESI ASM          0.00 ! sphingomyelin d18:1/20:0
GROUP            !
ATOM N          NTL -0.60 ! H15B
ATOM C15        CTL5 -0.35 ! |
```



|           |      |         |
|-----------|------|---------|
| ATOM H15A | HL   | 0.25 !  |
| ATOM H15B | HL   | 0.25 !  |
| ATOM H15C | HL   | 0.25 !  |
| ATOM C14  | CTL5 | -0.35 ! |
| ATOM H14A | HL   | 0.25 !  |
| ATOM H14B | HL   | 0.25 !  |
| ATOM H14C | HL   | 0.25 !  |
| ATOM C13  | CTL5 | -0.35 ! |
| ATOM H13A | HL   | 0.25 !  |
| ATOM H13B | HL   | 0.25 !  |
| ATOM H13C | HL   | 0.25 !  |
| ATOM C12  | CTL2 | -0.10 ! |
| ATOM H12A | HL   | 0.25 !  |
| ATOM H12B | HL   | 0.25 !  |
| GROUP     |      | !       |
| ATOM C11  | CTL2 | -0.08 ! |
| ATOM H11A | HAL2 | 0.09 !  |
| ATOM H11B | HAL2 | 0.09 !  |
| ATOM P    | PL   | 1.50 !  |
| ATOM O13  | O2L  | -0.78 ! |
| ATOM O14  | O2L  | -0.78 ! |
| ATOM O11  | OSLP | -0.57 ! |
| ATOM O12  | OSLP | -0.57 ! |
| ATOM C1S  | CTL2 | -0.08 ! |
| ATOM H1S  | HAL2 | 0.09 !  |
| ATOM H1T  | HAL2 | 0.09 !  |
| GROUP     |      | !       |
| ATOM NF   | NHL  | -0.70 ! |
| ATOM HNF  | H    | 0.35 !  |
| ATOM C2S  | CTL1 | 0.30 !  |
| ATOM H2S  | HAL1 | 0.05 !  |
| GROUP     |      | !       |
| ATOM C3S  | CTO1 | 0.50 !  |
| ATOM H3S  | HAL1 | -0.11 ! |
| ATOM O3   | OHL  | -0.69 ! |
| ATOM HO3  | HOL  | 0.30 !  |
| GROUP     |      | !       |
| ATOM C4S  | CEL3 | -0.15 ! |
| ATOM H4S  | HEL1 | 0.15 !  |
| GROUP     |      | !       |
| ATOM C5S  | CEL3 | -0.15 ! |
| ATOM H5S  | HEL1 | 0.15 !  |
| GROUP     |      | !       |
| ATOM C6S  | CTL2 | -0.18 ! |
| ATOM H6S  | HAL2 | 0.09 !  |
| ATOM H6T  | HAL2 | 0.09 !  |
| GROUP     |      | !       |
| ATOM C7S  | CTL2 | -0.18 ! |
| ATOM H7S  | HAL2 | 0.09 !  |
| ATOM H7T  | HAL2 | 0.09 !  |
| GROUP     |      | !       |
| ATOM C8S  | CTL2 | -0.18 ! |
| ATOM H8S  | HAL2 | 0.09 !  |
| ATOM H8T  | HAL2 | 0.09 !  |
| GROUP     |      | !       |
| ATOM C9S  | CTL2 | -0.18 ! |
| ATOM H9S  | HAL2 | 0.09 !  |
| ATOM H9T  | HAL2 | 0.09 !  |
| GROUP     |      | !       |
| ATOM C10S | CTL2 | -0.18 ! |
| ATOM H10S | HAL2 | 0.09 !  |
| ATOM H10T | HAL2 | 0.09 !  |
| GROUP     |      | !       |
| ATOM C11S | CTL2 | -0.18 ! |
| ATOM H11S | HAL2 | 0.09 !  |
| ATOM H11T | HAL2 | 0.09 !  |
| GROUP     |      | !       |
| ATOM C12S | CTL2 | -0.18 ! |
| ATOM H12S | HAL2 | 0.09 !  |
| ATOM H12T | HAL2 | 0.09 !  |
| GROUP     |      | !       |

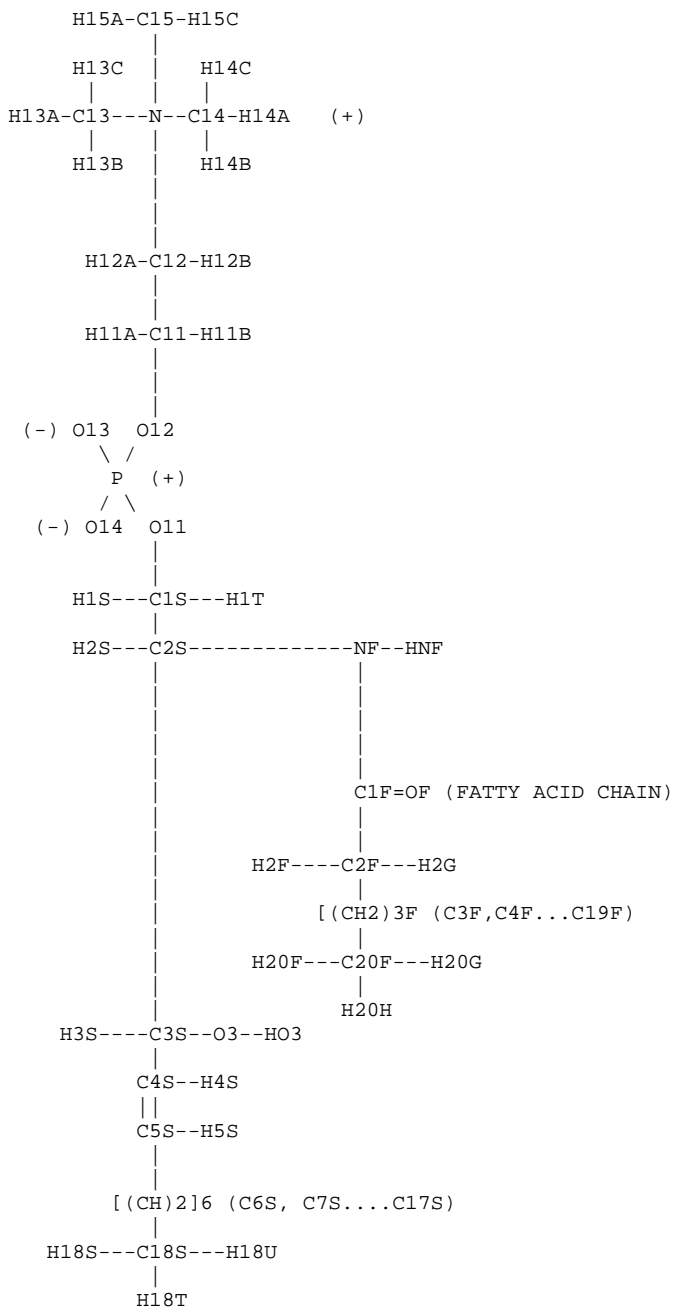

|           |      |       |                   |
|-----------|------|-------|-------------------|
| ATOM C13S | CTL2 | -0.18 | !                 |
| ATOM H13S | HAL2 | 0.09  | !                 |
| ATOM H13T | HAL2 | 0.09  | !                 |
| GROUP     |      |       |                   |
| ATOM C14S | CTL2 | -0.18 | !                 |
| ATOM H14S | HAL2 | 0.09  | !                 |
| ATOM H14T | HAL2 | 0.09  | !                 |
| GROUP     |      |       |                   |
| ATOM C15S | CTL2 | -0.18 | !                 |
| ATOM H15S | HAL2 | 0.09  | !                 |
| ATOM H15T | HAL2 | 0.09  | !                 |
| GROUP     |      |       |                   |
| ATOM C16S | CTL2 | -0.18 | !                 |
| ATOM H16S | HAL2 | 0.09  | !                 |
| ATOM H16T | HAL2 | 0.09  | !                 |
| GROUP     |      |       |                   |
| ATOM C17S | CTL2 | -0.18 | !                 |
| ATOM H17S | HAL2 | 0.09  | !                 |
| ATOM H17T | HAL2 | 0.09  | !                 |
| GROUP     |      |       | !                 |
| ATOM C18S | CTL3 | -0.27 | !                 |
| ATOM H18S | HAL3 | 0.09  | !                 |
| ATOM H18T | HAL3 | 0.09  | !                 |
| ATOM H18U | HAL3 | 0.09  | !                 |
| GROUP     |      |       | !FATTY ACID CHAIN |
| ATOM C1F  | C    | 0.55  | !                 |
| ATOM OF   | O    | -0.60 | !                 |
| ATOM C2F  | CTL2 | -0.07 | !                 |
| ATOM H2F  | HAL2 | 0.06  | !                 |
| ATOM H2G  | HAL2 | 0.06  | !                 |
| GROUP     |      |       | !                 |
| ATOM C3F  | CTL2 | -0.18 | !                 |
| ATOM H3F  | HAL2 | 0.09  | !                 |
| ATOM H3G  | HAL2 | 0.09  | !                 |
| GROUP     |      |       | !                 |
| ATOM C4F  | CTL2 | -0.18 | !                 |
| ATOM H4F  | HAL2 | 0.09  | !                 |
| ATOM H4G  | HAL2 | 0.09  | !                 |
| GROUP     |      |       | !                 |
| ATOM C5F  | CTL2 | -0.18 | !                 |
| ATOM H5F  | HAL2 | 0.09  | !                 |
| ATOM H5G  | HAL2 | 0.09  | !                 |
| GROUP     |      |       | !                 |
| ATOM C6F  | CTL2 | -0.18 | !                 |
| ATOM H6F  | HAL2 | 0.09  | !                 |
| ATOM H6G  | HAL2 | 0.09  | !                 |
| GROUP     |      |       | !                 |
| ATOM C7F  | CTL2 | -0.18 | !                 |
| ATOM H7F  | HAL2 | 0.09  | !                 |
| ATOM H7G  | HAL2 | 0.09  | !                 |
| GROUP     |      |       | !                 |
| ATOM C8F  | CTL2 | -0.18 | !                 |
| ATOM H8F  | HAL2 | 0.09  | !                 |
| ATOM H8G  | HAL2 | 0.09  | !                 |
| GROUP     |      |       | !                 |
| ATOM C9F  | CTL2 | -0.18 | !                 |
| ATOM H9F  | HAL2 | 0.09  | !                 |
| ATOM H9G  | HAL2 | 0.09  | !                 |
| GROUP     |      |       | !                 |
| ATOM C10F | CTL2 | -0.18 | !                 |
| ATOM H10F | HAL2 | 0.09  | !                 |
| ATOM H10G | HAL2 | 0.09  | !                 |
| GROUP     |      |       | !                 |
| ATOM C11F | CTL2 | -0.18 | !                 |
| ATOM H11F | HAL2 | 0.09  | !                 |
| ATOM H11G | HAL2 | 0.09  | !                 |
| GROUP     |      |       | !                 |
| ATOM C12F | CTL2 | -0.18 | !                 |
| ATOM H12F | HAL2 | 0.09  | !                 |
| ATOM H12G | HAL2 | 0.09  | !                 |
| GROUP     |      |       | !                 |

ATOM C13F CTL2 -0.18 !  
 ATOM H13F HAL2 0.09 !  
 ATOM H13G HAL2 0.09 !  
 GROUP !  
 ATOM C14F CTL2 -0.18 !  
 ATOM H14F HAL2 0.09 !  
 ATOM H14G HAL2 0.09 !  
 GROUP !  
 ATOM C15F CTL2 -0.18 !  
 ATOM H15F HAL2 0.09 !  
 ATOM H15G HAL2 0.09 !  
 GROUP !  
 ATOM C16F CTL2 -0.18 !  
 ATOM H16F HAL2 0.09 !  
 ATOM H16G HAL2 0.09 !  
 GROUP !  
 ATOM C17F CTL2 -0.18 !  
 ATOM H17F HAL2 0.09 !  
 ATOM H17G HAL2 0.09 !  
 GROUP !  
 ATOM C18F CTL2 -0.18 !  
 ATOM H18F HAL2 0.09 !  
 ATOM H18G HAL2 0.09 !  
 GROUP !  
 ATOM C19F CTL2 -0.18 !  
 ATOM H19F HAL2 0.09 !  
 ATOM H19G HAL2 0.09 !  
 GROUP !  
 ATOM C20F CTL3 -0.27 !  
 ATOM H20F HAL3 0.09 !  
 ATOM H20G HAL3 0.09 !  
 ATOM H20H HAL3 0.09 !

!SPHINGOSINE CHAIN

BOND C18S H18S C18S H18T C18S H18U  
 BOND C18S C17S C17S H17S C17S H17T  
 BOND C17S C16S C16S H16S C16S H16T  
 BOND C16S C15S C15S H15S C15S H15T  
 BOND C15S C14S C14S H14S C14S H14T  
 BOND C14S C13S C13S H13S C13S H13T  
 BOND C13S C12S C12S H12S C12S H12T  
 BOND C12S C11S C11S H11S C11S H11T  
 BOND C11S C10S C10S H10S C10S H10T  
 BOND C10S C9S C9S H9S C9S H9T  
 BOND C9S C8S C8S H8S C8S H8T  
 BOND C8S C7S C7S H7S C7S H7T  
 BOND C7S C6S C6S H6S C6S H6T  
 BOND C6S C5S C5S H5S C4S H4S  
 BOND C4S C3S C3S H3S C3S O3  
 BOND O3 HO3  
 BOND C3S C2S C2S H2S  
 BOND C2S C1S C1S H1S C1S H1T  
 BOND C1S O11

!PHOSLPHOCHOLINE

BOND O11 P O12 P O13 P O14 P  
 BOND O12 C11 C11 H11A C11 H11B  
 BOND C11 C12 C12 H12A C12 H12B  
 BOND C12 N N C13 N C14 N C15  
 BOND C13 H13A C13 H13B C13 H13C  
 BOND C14 H14A C14 H14B C14 H14C  
 BOND C15 H15A C15 H15B C15 H15C

!FATTY ACID CHAIN

BOND C2S NF NF HNF NF C1F  
 BOND C1F C2F C2F H2F C2F H2G  
 BOND C2F C3F C3F H3F C3F H3G  
 BOND C3F C4F C4F H4F C4F H4G  
 BOND C4F C5F C5F H5F C5F H5G  
 BOND C5F C6F C6F H6F C6F H6G  
 BOND C6F C7F C7F H7F C7F H7G  
 BOND C7F C8F C8F H8F C8F H8G  
 BOND C8F C9F C9F H9F C9F H9G

BOND C9F C10F C10F H10F C10F H10G  
 BOND C10F C11F C11F H11F C11F H11G  
 BOND C11F C12F C12F H12F C12F H12G  
 BOND C12F C13F C13F H13F C13F H13G  
 BOND C13F C14F C14F H14F C14F H14G  
 BOND C14F C15F C15F H15F C15F H15G  
 BOND C15F C16F C16F H16F C16F H16G  
 BOND C16F C17F C17F H17F C17F H17G  
 BOND C17F C18F C18F H18F C18F H18G  
 BOND C18F C19F C19F H19F C19F H19G  
 BOND C19F C20F C20F H20F C20F H20G  
 BOND C20F H20H

DOUBLE C4S C5S  
 DOUBLE C1F OF  
 IMPR C1F C2F NF OF NF C1F C2S HNF

|    |      |      |      |      |        |        |         |        |        |
|----|------|------|------|------|--------|--------|---------|--------|--------|
| IC | C18S | C17S | C16S | C15S | 1.5309 | 113.23 | 180.00  | 112.64 | 1.5346 |
| IC | C17S | C16S | C15S | C14S | 1.5337 | 112.64 | 180.00  | 112.58 | 1.5345 |
| IC | C16S | C15S | C14S | C13S | 1.5346 | 112.58 | 180.00  | 112.58 | 1.5345 |
| IC | C15S | C14S | C13S | C12S | 1.5345 | 112.58 | -179.99 | 112.58 | 1.5345 |
| IC | C14S | C13S | C12S | C11S | 1.5345 | 112.58 | 179.97  | 112.58 | 1.5344 |
| IC | C13S | C12S | C11S | C10S | 1.5345 | 112.58 | -179.96 | 112.61 | 1.5345 |
| IC | C12S | C11S | C10S | C9S  | 1.5344 | 112.61 | 179.97  | 112.54 | 1.5344 |
| IC | C11S | C10S | C9S  | C8S  | 1.5345 | 112.54 | -179.87 | 112.66 | 1.5345 |
| IC | C10S | C9S  | C8S  | C7S  | 1.5344 | 112.66 | -179.89 | 112.50 | 1.5354 |
| IC | C9S  | C8S  | C7S  | C6S  | 1.5345 | 112.50 | -179.79 | 112.41 | 1.5391 |
| IC | C8S  | C7S  | C6S  | C5S  | 1.5354 | 112.41 | -179.61 | 111.46 | 1.5077 |
| IC | C7S  | C6S  | C5S  | C4S  | 1.5391 | 111.46 | -117.13 | 124.77 | 1.3444 |
| IC | C6S  | C5S  | C4S  | C3S  | 1.5077 | 124.77 | 179.01  | 124.28 | 1.5009 |
| IC | C5S  | C4S  | C3S  | C2S  | 1.3444 | 124.28 | -84.24  | 110.14 | 1.5343 |
| IC | C5S  | C4S  | C3S  | O3   | 1.3444 | 124.28 | 156.07  | 107.64 | 1.4235 |
| IC | C4S  | C3S  | C2S  | C1S  | 1.5009 | 110.14 | -70.50  | 114.25 | 1.5586 |
| IC | C13  | C12  | *N   | C14  | 1.4967 | 109.68 | 116.91  | 107.30 | 1.5040 |
| IC | C13  | C12  | *N   | C15  | 1.4967 | 109.68 | -123.42 | 110.88 | 1.4938 |
| IC | C12  | N    | C15  | H15A | 1.5212 | 110.88 | -177.15 | 111.31 | 1.0816 |
| IC | H15A | N    | *C15 | H15B | 1.0816 | 111.31 | 118.98  | 109.44 | 1.0875 |
| IC | H15A | N    | *C15 | H15C | 1.0816 | 111.31 | -122.11 | 111.46 | 1.0818 |
| IC | C12  | N    | C14  | H14A | 1.5212 | 107.30 | -178.89 | 114.23 | 1.0739 |
| IC | H14A | N    | *C14 | H14B | 1.0739 | 114.23 | 123.44  | 110.21 | 1.0968 |
| IC | H14A | N    | *C14 | H14C | 1.0739 | 114.23 | -124.43 | 111.41 | 1.0948 |
| IC | C12  | N    | C13  | H13A | 1.5212 | 109.68 | 176.44  | 111.15 | 1.0822 |
| IC | H13A | N    | *C13 | H13B | 1.0822 | 111.15 | 121.89  | 111.75 | 1.0814 |
| IC | H13A | N    | *C13 | H13C | 1.0822 | 111.15 | -118.50 | 109.57 | 1.0892 |
| IC | C13  | N    | C12  | C11  | 1.4967 | 109.68 | -178.83 | 116.30 | 1.5392 |
| IC | C11  | N    | *C12 | H12A | 1.5392 | 116.30 | 117.04  | 108.30 | 1.0985 |
| IC | C11  | N    | *C12 | H12B | 1.5392 | 116.30 | -126.61 | 112.36 | 1.0787 |
| IC | N    | C12  | C11  | O12  | 1.5212 | 116.30 | 126.79  | 107.85 | 1.4239 |
| IC | O12  | C12  | *C11 | H11A | 1.4239 | 107.85 | 118.10  | 109.30 | 1.1131 |
| IC | O12  | C12  | *C11 | H11B | 1.4239 | 107.85 | -123.12 | 113.16 | 1.1140 |
| IC | C12  | C11  | O12  | P    | 1.5392 | 107.85 | -68.29  | 118.09 | 1.5886 |
| IC | C11  | O12  | P    | O11  | 1.4239 | 118.09 | -167.58 | 104.18 | 1.5725 |
| IC | O11  | O12  | *P   | O13  | 1.5725 | 104.18 | 116.57  | 107.05 | 1.4823 |
| IC | O11  | O12  | *P   | O14  | 1.5725 | 104.18 | -118.73 | 106.98 | 1.4805 |
| IC | O12  | P    | O11  | C1S  | 1.5886 | 104.18 | 51.85   | 121.69 | 1.4327 |
| IC | P    | O11  | C1S  | C2S  | 1.5725 | 121.69 | 103.66  | 111.21 | 1.5586 |
| IC | C2S  | O11  | *C1S | H1S  | 1.5586 | 111.21 | 118.79  | 108.35 | 1.1121 |
| IC | C2S  | O11  | *C1S | H1T  | 1.5586 | 111.21 | -123.25 | 112.85 | 1.1152 |
| IC | O11  | C1S  | C2S  | C3S  | 1.4327 | 111.21 | 175.67  | 114.25 | 1.5343 |
| IC | C3S  | C1S  | *C2S | NF   | 1.5343 | 114.25 | 120.00  | 111.52 | 1.4406 |
| IC | C3S  | C1S  | *C2S | H2S  | 1.5343 | 114.25 | -120.00 | 105.03 | 1.1194 |
| IC | C1S  | C2S  | NF   | C1F  | 1.5586 | 111.52 | 160.94  | 124.85 | 1.3364 |
| IC | C1F  | C2S  | *NF  | HNF  | 1.3364 | 124.85 | -157.81 | 113.39 | 1.0062 |
| IC | C1S  | C2S  | C3S  | C4S  | 1.5586 | 114.25 | -70.50  | 110.14 | 1.5009 |
| IC | C4S  | C2S  | *C3S | O3   | 1.5009 | 110.14 | 118.36  | 109.80 | 1.4235 |
| IC | C4S  | C2S  | *C3S | H3S  | 1.5009 | 110.14 | -121.14 | 110.10 | 1.1140 |
| IC | C2S  | C3S  | O3   | HO3  | 1.5343 | 109.80 | 46.50   | 104.54 | 0.9610 |
| IC | C2S  | C3S  | C4S  | C5S  | 1.5343 | 110.14 | -84.24  | 124.28 | 1.3444 |
| IC | C5S  | C3S  | *C4S | H4S  | 1.3444 | 124.28 | 178.79  | 115.93 | 1.1003 |
| IC | C3S  | C4S  | C5S  | C6S  | 1.5009 | 124.28 | 179.01  | 124.77 | 1.5077 |
| IC | C6S  | C4S  | *C5S | H5S  | 1.5077 | 124.77 | -178.18 | 119.00 | 1.1029 |

|    |      |      |       |      |        |        |         |        |        |
|----|------|------|-------|------|--------|--------|---------|--------|--------|
| IC | C4S  | C5S  | C6S   | C7S  | 1.3444 | 124.77 | -117.13 | 111.46 | 1.5391 |
| IC | C7S  | C5S  | *C6S  | H6S  | 1.5391 | 111.46 | 120.98  | 111.41 | 1.1142 |
| IC | C7S  | C5S  | *C6S  | H6T  | 1.5391 | 111.46 | -120.60 | 109.91 | 1.1125 |
| IC | C5S  | C6S  | C7S   | C8S  | 1.5077 | 111.46 | -179.61 | 112.41 | 1.5354 |
| IC | C8S  | C6S  | *C7S  | H7S  | 1.5354 | 112.41 | 121.26  | 109.74 | 1.1138 |
| IC | C8S  | C6S  | *C7S  | H7T  | 1.5354 | 112.41 | -120.99 | 109.40 | 1.1147 |
| IC | C6S  | C7S  | C8S   | C9S  | 1.5391 | 112.41 | -179.79 | 112.50 | 1.5345 |
| IC | C9S  | C7S  | *C8S  | H8S  | 1.5345 | 112.50 | 121.20  | 108.97 | 1.1132 |
| IC | C9S  | C7S  | *C8S  | H8T  | 1.5345 | 112.50 | -121.38 | 109.07 | 1.1129 |
| IC | C7S  | C8S  | C9S   | C10S | 1.5354 | 112.50 | -179.89 | 112.66 | 1.5344 |
| IC | C10S | C8S  | *C9S  | H9S  | 1.5344 | 112.66 | 121.49  | 109.05 | 1.1133 |
| IC | C10S | C8S  | *C9S  | H9T  | 1.5344 | 112.66 | -121.38 | 108.96 | 1.1136 |
| IC | C8S  | C9S  | C10S  | C11S | 1.5345 | 112.66 | -179.87 | 112.54 | 1.5345 |
| IC | C11S | C9S  | *C10S | H10S | 1.5345 | 112.54 | 121.27  | 109.07 | 1.1133 |
| IC | C11S | C9S  | *C10S | H10T | 1.5345 | 112.54 | -121.34 | 109.11 | 1.1132 |
| IC | C9S  | C10S | C11S  | C12S | 1.5344 | 112.54 | 179.97  | 112.61 | 1.5344 |
| IC | C12S | C10S | *C11S | H11S | 1.5344 | 112.61 | 121.36  | 109.09 | 1.1133 |
| IC | C12S | C10S | *C11S | H11T | 1.5344 | 112.61 | -121.33 | 109.07 | 1.1134 |
| IC | C10S | C11S | C12S  | C13S | 1.5345 | 112.61 | -179.96 | 112.58 | 1.5345 |
| IC | C13S | C11S | *C12S | H12S | 1.5345 | 112.58 | 121.29  | 109.12 | 1.1133 |
| IC | C13S | C11S | *C12S | H12T | 1.5345 | 112.58 | -121.31 | 109.15 | 1.1133 |
| IC | C11S | C12S | C13S  | C14S | 1.5344 | 112.58 | 179.97  | 112.58 | 1.5345 |
| IC | C14S | C12S | *C13S | H13S | 1.5345 | 112.58 | 121.30  | 109.13 | 1.1133 |
| IC | C14S | C12S | *C13S | H13T | 1.5345 | 112.58 | -121.30 | 109.13 | 1.1133 |
| IC | C12S | C13S | C14S  | C15S | 1.5345 | 112.58 | -179.99 | 112.58 | 1.5345 |
| IC | C15S | C13S | *C14S | H14S | 1.5345 | 112.58 | 121.30  | 109.12 | 1.1133 |
| IC | C15S | C13S | *C14S | H14T | 1.5345 | 112.58 | -121.31 | 109.12 | 1.1133 |
| IC | C13S | C14S | C15S  | C16S | 1.5345 | 112.58 | 180.00  | 112.58 | 1.5346 |
| IC | C16S | C14S | *C15S | H15S | 1.5346 | 112.58 | 121.30  | 109.11 | 1.1133 |
| IC | C16S | C14S | *C15S | H15T | 1.5346 | 112.58 | -121.30 | 109.11 | 1.1133 |
| IC | C14S | C15S | C16S  | C17S | 1.5345 | 112.58 | 180.00  | 112.64 | 1.5337 |
| IC | C17S | C15S | *C16S | H16S | 1.5337 | 112.64 | 121.32  | 109.14 | 1.1133 |
| IC | C17S | C15S | *C16S | H16T | 1.5337 | 112.64 | -121.32 | 109.14 | 1.1133 |
| IC | C15S | C16S | C17S  | C18S | 1.5346 | 112.64 | 180.00  | 113.23 | 1.5309 |
| IC | C18S | C16S | *C17S | H17S | 1.5309 | 113.23 | 121.67  | 108.77 | 1.1142 |
| IC | C18S | C16S | *C17S | H17T | 1.5309 | 113.23 | -121.67 | 108.77 | 1.1142 |
| IC | C16S | C17S | C18S  | H18S | 1.5337 | 113.23 | 180.00  | 110.63 | 1.1113 |
| IC | H18S | C17S | *C18S | H18T | 1.1113 | 110.63 | 120.07  | 110.47 | 1.1114 |
| IC | H18S | C17S | *C18S | H18U | 1.1113 | 110.63 | -120.07 | 110.47 | 1.1114 |
| IC | C2S  | NF   | C1F   | C2F  | 1.4406 | 124.85 | -156.83 | 114.97 | 1.4964 |
| IC | C2F  | NF   | *C1F  | OF   | 1.4964 | 114.97 | 162.54  | 122.11 | 1.2268 |
| IC | NF   | C1F  | C2F   | C3F  | 1.3364 | 114.97 | -146.57 | 111.92 | 1.5432 |
| IC | C3F  | C1F  | *C2F  | H2F  | 1.5432 | 111.92 | -120.83 | 107.93 | 1.1115 |
| IC | H2F  | C1F  | *C2F  | H2G  | 1.1115 | 107.93 | -117.30 | 109.04 | 1.1113 |
| IC | C1F  | C2F  | C3F   | C4F  | 1.4964 | 111.92 | 179.54  | 112.84 | 1.5310 |
| IC | C4F  | C2F  | *C3F  | H3F  | 1.5310 | 112.84 | -121.63 | 109.37 | 1.1145 |
| IC | H3F  | C2F  | *C3F  | H3G  | 1.1145 | 109.37 | -117.07 | 109.08 | 1.1157 |
| IC | C2F  | C3F  | C4F   | C5F  | 1.5434 | 112.23 | 174.86  | 112.58 | 1.5342 |
| IC | C5F  | C3F  | *C4F  | H4F  | 1.5342 | 112.58 | -120.18 | 108.65 | 1.1140 |
| IC | H4F  | C3F  | *C4F  | H4G  | 1.1140 | 108.65 | -117.52 | 109.62 | 1.1127 |
| IC | C3F  | C4F  | C5F   | C6F  | 1.5340 | 112.58 | -174.06 | 112.39 | 1.5340 |
| IC | C6F  | C4F  | *C5F  | H5F  | 1.5340 | 112.39 | -122.01 | 109.38 | 1.1130 |
| IC | H5F  | C4F  | *C5F  | H5G  | 1.1130 | 109.38 | -117.34 | 108.92 | 1.1134 |
| IC | C4F  | C5F  | C6F   | C7F  | 1.5342 | 112.39 | 178.27  | 112.75 | 1.5340 |
| IC | C7F  | C5F  | *C6F  | H6F  | 1.5340 | 112.75 | -120.93 | 108.96 | 1.1137 |
| IC | H6F  | C5F  | *C6F  | H6G  | 1.1137 | 108.96 | -117.41 | 109.22 | 1.1131 |
| IC | C5F  | C6F  | C7F   | C8F  | 1.5340 | 112.75 | -178.89 | 112.33 | 1.5342 |
| IC | C8F  | C6F  | *C7F  | H7F  | 1.5342 | 112.33 | -121.40 | 109.26 | 1.1132 |
| IC | H7F  | C6F  | *C7F  | H7G  | 1.1132 | 109.26 | -117.45 | 109.12 | 1.1130 |
| IC | C6F  | C7F  | C8F   | C9F  | 1.5340 | 112.33 | 179.09  | 112.77 | 1.5340 |
| IC | C9F  | C7F  | *C8F  | H8F  | 1.5340 | 112.77 | -121.23 | 109.16 | 1.1134 |
| IC | H8F  | C7F  | *C8F  | H8G  | 1.1134 | 109.16 | -117.38 | 109.08 | 1.1133 |
| IC | C7F  | C8F  | C9F   | C10F | 1.5342 | 112.77 | 179.02  | 112.34 | 1.5343 |
| IC | C10F | C8F  | *C9F  | H9F  | 1.5343 | 112.34 | -121.27 | 109.27 | 1.1132 |
| IC | H9F  | C8F  | *C9F  | H9G  | 1.1132 | 109.27 | -117.45 | 109.10 | 1.1130 |
| IC | C8F  | C9F  | C10F  | C11F | 1.5340 | 112.34 | 178.16  | 112.74 | 1.5340 |
| IC | C11F | C9F  | *C10F | H10F | 1.5340 | 112.74 | -121.18 | 109.16 | 1.1134 |
| IC | H10F | C9F  | *C10F | H10G | 1.1134 | 109.16 | -117.35 | 109.10 | 1.1132 |
| IC | C9F  | C10F | C11F  | C12F | 1.5343 | 112.74 | 178.91  | 112.38 | 1.5343 |
| IC | C12F | C10F | *C11F | H11F | 1.5343 | 112.38 | -121.39 | 109.34 | 1.1131 |
| IC | H11F | C10F | *C11F | H11G | 1.1131 | 109.34 | -117.43 | 108.98 | 1.1132 |

|    |      |      |       |      |        |        |         |        |        |
|----|------|------|-------|------|--------|--------|---------|--------|--------|
| IC | C10F | C11F | C12F  | C13F | 1.5340 | 112.38 | 176.93  | 112.68 | 1.5340 |
| IC | C13F | C11F | *C12F | H12F | 1.5340 | 112.68 | -121.02 | 109.05 | 1.1134 |
| IC | H12F | C11F | *C12F | H12G | 1.1134 | 109.05 | -117.34 | 109.20 | 1.1131 |
| IC | C11F | C12F | C13F  | C14F | 1.5343 | 112.68 | -179.93 | 112.45 | 1.5345 |
| IC | C14F | C12F | *C13F | H13F | 1.5345 | 112.45 | -121.60 | 109.42 | 1.1129 |
| IC | H13F | C12F | *C13F | H13G | 1.1129 | 109.42 | -117.40 | 108.85 | 1.1134 |
| IC | C12F | C13F | C14F  | C15F | 1.5340 | 112.45 | 175.93  | 112.68 | 1.5334 |
| IC | C15F | C13F | *C14F | H14F | 1.5334 | 112.68 | -121.00 | 109.06 | 1.1131 |
| IC | H14F | C13F | *C14F | H14G | 1.1131 | 109.06 | -117.24 | 109.28 | 1.1130 |
| IC | C13F | C14F | C15F  | C16F | 1.5345 | 112.68 | -178.23 | 113.16 | 1.5306 |
| IC | C16F | C14F | *C15F | H15F | 1.5306 | 113.16 | -121.86 | 108.84 | 1.1140 |
| IC | H15F | C14F | *C15F | H15G | 1.1140 | 108.84 | -116.70 | 108.76 | 1.1144 |
| IC | C14F | C15F | C16F  | C17F | 1.5345 | 112.68 | -178.23 | 113.16 | 1.5306 |
| IC | C17F | C15F | *C16F | H16F | 1.5306 | 113.16 | -121.86 | 108.84 | 1.1140 |
| IC | H16F | C15F | *C16F | H16G | 1.1140 | 108.84 | -116.70 | 108.76 | 1.1144 |
| IC | C15F | C16F | C17F  | C18F | 1.5345 | 112.68 | -178.23 | 113.16 | 1.5306 |
| IC | C18F | C16F | *C17F | H17F | 1.5306 | 113.16 | -121.86 | 108.84 | 1.1140 |
| IC | H17F | C16F | *C17F | H17G | 1.1140 | 108.84 | -116.70 | 108.76 | 1.1144 |
| IC | C16F | C17F | C18F  | C19F | 1.5345 | 112.68 | -178.23 | 113.16 | 1.5306 |
| IC | C19F | C17F | *C18F | H18F | 1.5306 | 113.16 | -121.86 | 108.84 | 1.1140 |
| IC | H18F | C17F | *C18F | H18G | 1.1140 | 108.84 | -116.70 | 108.76 | 1.1144 |
| IC | C17F | C18F | C19F  | C20F | 1.5345 | 112.68 | -178.23 | 113.16 | 1.5306 |
| IC | C20F | C18F | *C19F | H19F | 1.5306 | 113.16 | -121.86 | 108.84 | 1.1140 |
| IC | H19F | C18F | *C19F | H19G | 1.1140 | 108.84 | -116.70 | 108.76 | 1.1144 |
| IC | C18F | C19F | C20F  | H20F | 1.5334 | 113.16 | -59.91  | 110.49 | 1.1113 |
| IC | H20F | C19F | *C20F | H20G | 1.1113 | 110.49 | 119.86  | 110.41 | 1.1115 |
| IC | H20F | C19F | *C20F | H20H | 1.1113 | 110.49 | -120.11 | 110.63 | 1.1112 |

PATCH FIRST NONE LAST NONE

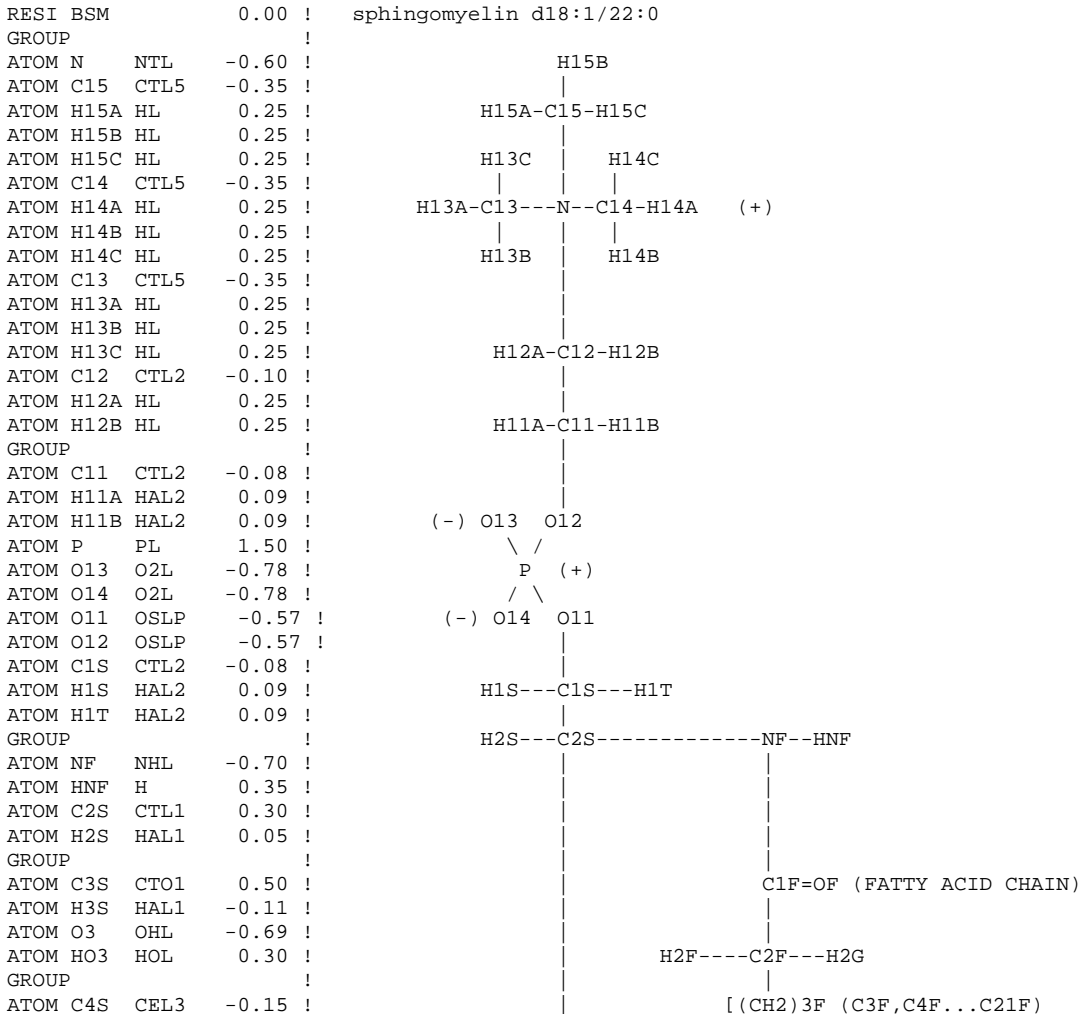



|           |      |       |   |
|-----------|------|-------|---|
| GROUP     |      |       | ! |
| ATOM C5F  | CTL2 | -0.18 | ! |
| ATOM H5F  | HAL2 | 0.09  | ! |
| ATOM H5G  | HAL2 | 0.09  | ! |
| GROUP     |      |       | ! |
| ATOM C6F  | CTL2 | -0.18 | ! |
| ATOM H6F  | HAL2 | 0.09  | ! |
| ATOM H6G  | HAL2 | 0.09  | ! |
| GROUP     |      |       | ! |
| ATOM C7F  | CTL2 | -0.18 | ! |
| ATOM H7F  | HAL2 | 0.09  | ! |
| ATOM H7G  | HAL2 | 0.09  | ! |
| GROUP     |      |       | ! |
| ATOM C8F  | CTL2 | -0.18 | ! |
| ATOM H8F  | HAL2 | 0.09  | ! |
| ATOM H8G  | HAL2 | 0.09  | ! |
| GROUP     |      |       | ! |
| ATOM C9F  | CTL2 | -0.18 | ! |
| ATOM H9F  | HAL2 | 0.09  | ! |
| ATOM H9G  | HAL2 | 0.09  | ! |
| GROUP     |      |       | ! |
| ATOM C10F | CTL2 | -0.18 | ! |
| ATOM H10F | HAL2 | 0.09  | ! |
| ATOM H10G | HAL2 | 0.09  | ! |
| GROUP     |      |       | ! |
| ATOM C11F | CTL2 | -0.18 | ! |
| ATOM H11F | HAL2 | 0.09  | ! |
| ATOM H11G | HAL2 | 0.09  | ! |
| GROUP     |      |       | ! |
| ATOM C12F | CTL2 | -0.18 | ! |
| ATOM H12F | HAL2 | 0.09  | ! |
| ATOM H12G | HAL2 | 0.09  | ! |
| GROUP     |      |       | ! |
| ATOM C13F | CTL2 | -0.18 | ! |
| ATOM H13F | HAL2 | 0.09  | ! |
| ATOM H13G | HAL2 | 0.09  | ! |
| GROUP     |      |       | ! |
| ATOM C14F | CTL2 | -0.18 | ! |
| ATOM H14F | HAL2 | 0.09  | ! |
| ATOM H14G | HAL2 | 0.09  | ! |
| GROUP     |      |       | ! |
| ATOM C15F | CTL2 | -0.18 | ! |
| ATOM H15F | HAL2 | 0.09  | ! |
| ATOM H15G | HAL2 | 0.09  | ! |
| GROUP     |      |       | ! |
| ATOM C16F | CTL2 | -0.18 | ! |
| ATOM H16F | HAL2 | 0.09  | ! |
| ATOM H16G | HAL2 | 0.09  | ! |
| GROUP     |      |       | ! |
| ATOM C17F | CTL2 | -0.18 | ! |
| ATOM H17F | HAL2 | 0.09  | ! |
| ATOM H17G | HAL2 | 0.09  | ! |
| GROUP     |      |       | ! |
| ATOM C18F | CTL2 | -0.18 | ! |
| ATOM H18F | HAL2 | 0.09  | ! |
| ATOM H18G | HAL2 | 0.09  | ! |
| GROUP     |      |       | ! |
| ATOM C19F | CTL2 | -0.18 | ! |
| ATOM H19F | HAL2 | 0.09  | ! |
| ATOM H19G | HAL2 | 0.09  | ! |
| GROUP     |      |       | ! |
| ATOM C20F | CTL2 | -0.18 | ! |
| ATOM H20F | HAL2 | 0.09  | ! |
| ATOM H20G | HAL2 | 0.09  | ! |
| GROUP     |      |       | ! |
| ATOM C21F | CTL2 | -0.18 | ! |
| ATOM H21F | HAL2 | 0.09  | ! |
| ATOM H21G | HAL2 | 0.09  | ! |
| GROUP     |      |       | ! |
| ATOM C22F | CTL3 | -0.27 | ! |
| ATOM H22F | HAL3 | 0.09  | ! |



ATOM H22G HAL3 0.09 !  
 ATOM H22H HAL3 0.09 !

!SPHINGOSINE CHAIN

BOND C18S H18S C18S H18T C18S H18U  
 BOND C18S C17S C17S H17S C17S H17T  
 BOND C17S C16S C16S H16S C16S H16T  
 BOND C16S C15S C15S H15S C15S H15T  
 BOND C15S C14S C14S H14S C14S H14T  
 BOND C14S C13S C13S H13S C13S H13T  
 BOND C13S C12S C12S H12S C12S H12T  
 BOND C12S C11S C11S H11S C11S H11T  
 BOND C11S C10S C10S H10S C10S H10T  
 BOND C10S C9S C9S H9S C9S H9T  
 BOND C9S C8S C8S H8S C8S H8T  
 BOND C8S C7S C7S H7S C7S H7T  
 BOND C7S C6S C6S H6S C6S H6T  
 BOND C6S C5S C5S H5S C4S H4S  
 BOND C4S C3S C3S H3S C3S O3  
 BOND O3 HO3  
 BOND C3S C2S C2S H2S  
 BOND C2S C1S C1S H1S C1S H1T  
 BOND C1S O11

!PHOSLPHOCHOLINE

BOND O11 P O12 P O13 P O14 P  
 BOND O12 C11 C11 H11A C11 H11B  
 BOND C11 C12 C12 H12A C12 H12B  
 BOND C12 N N C13 N C14 N C15  
 BOND C13 H13A C13 H13B C13 H13C  
 BOND C14 H14A C14 H14B C14 H14C  
 BOND C15 H15A C15 H15B C15 H15C

!FATTY ACID CHAIN

BOND C2S NF NF HNF NF C1F  
 BOND C1F C2F C2F H2F C2F H2G  
 BOND C2F C3F C3F H3F C3F H3G  
 BOND C3F C4F C4F H4F C4F H4G  
 BOND C4F C5F C5F H5F C5F H5G  
 BOND C5F C6F C6F H6F C6F H6G  
 BOND C6F C7F C7F H7F C7F H7G  
 BOND C7F C8F C8F H8F C8F H8G  
 BOND C8F C9F C9F H9F C9F H9G  
 BOND C9F C10F C10F H10F C10F H10G  
 BOND C10F C11F C11F H11F C11F H11G  
 BOND C11F C12F C12F H12F C12F H12G  
 BOND C12F C13F C13F H13F C13F H13G  
 BOND C13F C14F C14F H14F C14F H14G  
 BOND C14F C15F C15F H15F C15F H15G  
 BOND C15F C16F C16F H16F C16F H16G  
 BOND C16F C17F C17F H17F C17F H17G  
 BOND C17F C18F C18F H18F C18F H18G  
 BOND C18F C19F C19F H19F C19F H19G  
 BOND C19F C20F C20F H20F C20F H20G  
 BOND C20F C21F C21F H21F C21F H21G  
 BOND C21F C22F C22F H22F C22F H22G  
 BOND C22F H22H

DOUBLE C4S C5S  
 DOUBLE C1F OF  
 IMPR C1F C2F NF OF NF C1F C2S HNF

|    |      |      |      |      |        |        |         |        |        |
|----|------|------|------|------|--------|--------|---------|--------|--------|
| IC | C18S | C17S | C16S | C15S | 1.5309 | 113.23 | 180.00  | 112.64 | 1.5346 |
| IC | C17S | C16S | C15S | C14S | 1.5337 | 112.64 | 180.00  | 112.58 | 1.5345 |
| IC | C16S | C15S | C14S | C13S | 1.5346 | 112.58 | 180.00  | 112.58 | 1.5345 |
| IC | C15S | C14S | C13S | C12S | 1.5345 | 112.58 | -179.99 | 112.58 | 1.5345 |
| IC | C14S | C13S | C12S | C11S | 1.5345 | 112.58 | 179.97  | 112.58 | 1.5344 |
| IC | C13S | C12S | C11S | C10S | 1.5345 | 112.58 | -179.96 | 112.61 | 1.5345 |
| IC | C12S | C11S | C10S | C9S  | 1.5344 | 112.61 | 179.97  | 112.54 | 1.5344 |
| IC | C11S | C10S | C9S  | C8S  | 1.5345 | 112.54 | -179.87 | 112.66 | 1.5345 |
| IC | C10S | C9S  | C8S  | C7S  | 1.5344 | 112.66 | -179.89 | 112.50 | 1.5354 |
| IC | C9S  | C8S  | C7S  | C6S  | 1.5345 | 112.50 | -179.79 | 112.41 | 1.5391 |
| IC | C8S  | C7S  | C6S  | C5S  | 1.5354 | 112.41 | -179.61 | 111.46 | 1.5077 |

|    |      |      |       |      |        |        |         |        |        |
|----|------|------|-------|------|--------|--------|---------|--------|--------|
| IC | C7S  | C6S  | C5S   | C4S  | 1.5391 | 111.46 | -117.13 | 124.77 | 1.3444 |
| IC | C6S  | C5S  | C4S   | C3S  | 1.5077 | 124.77 | 179.01  | 124.28 | 1.5009 |
| IC | C5S  | C4S  | C3S   | C2S  | 1.3444 | 124.28 | -84.24  | 110.14 | 1.5343 |
| IC | C5S  | C4S  | C3S   | O3   | 1.3444 | 124.28 | 156.07  | 107.64 | 1.4235 |
| IC | C4S  | C3S  | C2S   | C1S  | 1.5009 | 110.14 | -70.50  | 114.25 | 1.5586 |
| IC | C13  | C12  | *N    | C14  | 1.4967 | 109.68 | 116.91  | 107.30 | 1.5040 |
| IC | C13  | C12  | *N    | C15  | 1.4967 | 109.68 | -123.42 | 110.88 | 1.4938 |
| IC | C12  | N    | C15   | H15A | 1.5212 | 110.88 | -177.15 | 111.31 | 1.0816 |
| IC | H15A | N    | *C15  | H15B | 1.0816 | 111.31 | 118.98  | 109.44 | 1.0875 |
| IC | H15A | N    | *C15  | H15C | 1.0816 | 111.31 | -122.11 | 111.46 | 1.0818 |
| IC | C12  | N    | C14   | H14A | 1.5212 | 107.30 | -178.89 | 114.23 | 1.0739 |
| IC | H14A | N    | *C14  | H14B | 1.0739 | 114.23 | 123.44  | 110.21 | 1.0968 |
| IC | H14A | N    | *C14  | H14C | 1.0739 | 114.23 | -124.43 | 111.41 | 1.0948 |
| IC | C12  | N    | C13   | H13A | 1.5212 | 109.68 | 176.44  | 111.15 | 1.0822 |
| IC | H13A | N    | *C13  | H13B | 1.0822 | 111.15 | 121.89  | 111.75 | 1.0814 |
| IC | H13A | N    | *C13  | H13C | 1.0822 | 111.15 | -118.50 | 109.57 | 1.0892 |
| IC | C13  | N    | C12   | C11  | 1.4967 | 109.68 | -178.83 | 116.30 | 1.5392 |
| IC | C11  | N    | *C12  | H12A | 1.5392 | 116.30 | 117.04  | 108.30 | 1.0985 |
| IC | C11  | N    | *C12  | H12B | 1.5392 | 116.30 | -126.61 | 112.36 | 1.0787 |
| IC | N    | C12  | C11   | O12  | 1.5212 | 116.30 | 126.79  | 107.85 | 1.4239 |
| IC | O12  | C12  | *C11  | H11A | 1.4239 | 107.85 | 118.10  | 109.30 | 1.1131 |
| IC | O12  | C12  | *C11  | H11B | 1.4239 | 107.85 | -123.12 | 113.16 | 1.1140 |
| IC | C12  | C11  | O12   | P    | 1.5392 | 107.85 | -68.29  | 118.09 | 1.5886 |
| IC | C11  | O12  | P     | O11  | 1.4239 | 118.09 | -167.58 | 104.18 | 1.5725 |
| IC | O11  | O12  | *P    | O13  | 1.5725 | 104.18 | 116.57  | 107.05 | 1.4823 |
| IC | O11  | O12  | *P    | O14  | 1.5725 | 104.18 | -118.73 | 106.98 | 1.4805 |
| IC | O12  | P    | O11   | C1S  | 1.5886 | 104.18 | 51.85   | 121.69 | 1.4327 |
| IC | P    | O11  | C1S   | C2S  | 1.5725 | 121.69 | 103.66  | 111.21 | 1.5586 |
| IC | C2S  | O11  | *C1S  | H1S  | 1.5586 | 111.21 | 118.79  | 108.35 | 1.1121 |
| IC | C2S  | O11  | *C1S  | H1T  | 1.5586 | 111.21 | -123.25 | 112.85 | 1.1152 |
| IC | O11  | C1S  | C2S   | C3S  | 1.4327 | 111.21 | 175.67  | 114.25 | 1.5343 |
| IC | C3S  | C1S  | *C2S  | NF   | 1.5343 | 114.25 | 120.00  | 111.52 | 1.4406 |
| IC | C3S  | C1S  | *C2S  | H2S  | 1.5343 | 114.25 | -120.00 | 105.03 | 1.1194 |
| IC | C1S  | C2S  | NF    | C1F  | 1.5586 | 111.52 | 160.94  | 124.85 | 1.3364 |
| IC | C1F  | C2S  | *NF   | HNF  | 1.3364 | 124.85 | -157.81 | 113.39 | 1.0062 |
| IC | C1S  | C2S  | C3S   | C4S  | 1.5586 | 114.25 | -70.50  | 110.14 | 1.5009 |
| IC | C4S  | C2S  | *C3S  | O3   | 1.5009 | 110.14 | 118.36  | 109.80 | 1.4235 |
| IC | C4S  | C2S  | *C3S  | H3S  | 1.5009 | 110.14 | -121.14 | 110.10 | 1.1140 |
| IC | C2S  | C3S  | O3    | HO3  | 1.5343 | 109.80 | 46.50   | 104.54 | 0.9610 |
| IC | C2S  | C3S  | C4S   | C5S  | 1.5343 | 110.14 | -84.24  | 124.28 | 1.3444 |
| IC | C5S  | C3S  | *C4S  | H4S  | 1.3444 | 124.28 | 178.79  | 115.93 | 1.1003 |
| IC | C3S  | C4S  | C5S   | C6S  | 1.5009 | 124.28 | 179.01  | 124.77 | 1.5077 |
| IC | C6S  | C4S  | *C5S  | H5S  | 1.5077 | 124.77 | -178.18 | 119.00 | 1.1029 |
| IC | C4S  | C5S  | C6S   | C7S  | 1.3444 | 124.77 | -117.13 | 111.46 | 1.5391 |
| IC | C7S  | C5S  | *C6S  | H6S  | 1.5391 | 111.46 | 120.98  | 111.41 | 1.1142 |
| IC | C7S  | C5S  | *C6S  | H6T  | 1.5391 | 111.46 | -120.60 | 109.91 | 1.1125 |
| IC | C5S  | C6S  | C7S   | C8S  | 1.5077 | 111.46 | -179.61 | 112.41 | 1.5354 |
| IC | C8S  | C6S  | *C7S  | H7S  | 1.5354 | 112.41 | 121.26  | 109.74 | 1.1138 |
| IC | C8S  | C6S  | *C7S  | H7T  | 1.5354 | 112.41 | -120.99 | 109.40 | 1.1147 |
| IC | C6S  | C7S  | C8S   | C9S  | 1.5391 | 112.41 | -179.79 | 112.50 | 1.5345 |
| IC | C9S  | C7S  | *C8S  | H8S  | 1.5345 | 112.50 | 121.20  | 108.97 | 1.1132 |
| IC | C9S  | C7S  | *C8S  | H8T  | 1.5345 | 112.50 | -121.38 | 109.07 | 1.1129 |
| IC | C7S  | C8S  | C9S   | C10S | 1.5354 | 112.50 | -179.89 | 112.66 | 1.5344 |
| IC | C10S | C8S  | *C9S  | H9S  | 1.5344 | 112.66 | 121.49  | 109.05 | 1.1133 |
| IC | C10S | C8S  | *C9S  | H9T  | 1.5344 | 112.66 | -121.38 | 108.96 | 1.1136 |
| IC | C8S  | C9S  | C10S  | C11S | 1.5345 | 112.66 | -179.87 | 112.54 | 1.5345 |
| IC | C11S | C9S  | *C10S | H10S | 1.5345 | 112.54 | 121.27  | 109.07 | 1.1133 |
| IC | C11S | C9S  | *C10S | H10T | 1.5345 | 112.54 | -121.34 | 109.11 | 1.1132 |
| IC | C9S  | C10S | C11S  | C12S | 1.5344 | 112.54 | 179.97  | 112.61 | 1.5344 |
| IC | C12S | C10S | *C11S | H11S | 1.5344 | 112.61 | 121.36  | 109.09 | 1.1133 |
| IC | C12S | C10S | *C11S | H11T | 1.5344 | 112.61 | -121.33 | 109.07 | 1.1134 |
| IC | C10S | C11S | C12S  | C13S | 1.5345 | 112.61 | -179.96 | 112.58 | 1.5345 |
| IC | C13S | C11S | *C12S | H12S | 1.5345 | 112.58 | 121.29  | 109.12 | 1.1133 |
| IC | C13S | C11S | *C12S | H12T | 1.5345 | 112.58 | -121.31 | 109.15 | 1.1133 |
| IC | C11S | C12S | C13S  | C14S | 1.5344 | 112.58 | 179.97  | 112.58 | 1.5345 |
| IC | C14S | C12S | *C13S | H13S | 1.5345 | 112.58 | 121.30  | 109.13 | 1.1133 |
| IC | C14S | C12S | *C13S | H13T | 1.5345 | 112.58 | -121.30 | 109.13 | 1.1133 |
| IC | C12S | C13S | C14S  | C15S | 1.5345 | 112.58 | -179.99 | 112.58 | 1.5345 |
| IC | C15S | C13S | *C14S | H14S | 1.5345 | 112.58 | 121.30  | 109.12 | 1.1133 |
| IC | C15S | C13S | *C14S | H14T | 1.5345 | 112.58 | -121.31 | 109.12 | 1.1133 |
| IC | C13S | C14S | C15S  | C16S | 1.5345 | 112.58 | 180.00  | 112.58 | 1.5346 |

|    |      |      |       |      |        |        |         |        |        |
|----|------|------|-------|------|--------|--------|---------|--------|--------|
| IC | C16S | C14S | *C15S | H15S | 1.5346 | 112.58 | 121.30  | 109.11 | 1.1133 |
| IC | C16S | C14S | *C15S | H15T | 1.5346 | 112.58 | -121.30 | 109.11 | 1.1133 |
| IC | C14S | C15S | C16S  | C17S | 1.5345 | 112.58 | 180.00  | 112.64 | 1.5337 |
| IC | C17S | C15S | *C16S | H16S | 1.5337 | 112.64 | 121.32  | 109.14 | 1.1133 |
| IC | C17S | C15S | *C16S | H16T | 1.5337 | 112.64 | -121.32 | 109.14 | 1.1133 |
| IC | C15S | C16S | C17S  | C18S | 1.5346 | 112.64 | 180.00  | 113.23 | 1.5309 |
| IC | C18S | C16S | *C17S | H17S | 1.5309 | 113.23 | 121.67  | 108.77 | 1.1142 |
| IC | C18S | C16S | *C17S | H17T | 1.5309 | 113.23 | -121.67 | 108.77 | 1.1142 |
| IC | C16S | C17S | C18S  | H18S | 1.5337 | 113.23 | 180.00  | 110.63 | 1.1113 |
| IC | H18S | C17S | *C18S | H18T | 1.1113 | 110.63 | 120.07  | 110.47 | 1.1114 |
| IC | H18S | C17S | *C18S | H18U | 1.1113 | 110.63 | -120.07 | 110.47 | 1.1114 |
| IC | C2S  | NF   | C1F   | C2F  | 1.4406 | 124.85 | -156.83 | 114.97 | 1.4964 |
| IC | C2F  | NF   | *C1F  | OF   | 1.4964 | 114.97 | 162.54  | 122.11 | 1.2268 |
| IC | NF   | C1F  | C2F   | C3F  | 1.3364 | 114.97 | -146.57 | 111.92 | 1.5432 |
| IC | C3F  | C1F  | *C2F  | H2F  | 1.5432 | 111.92 | -120.83 | 107.93 | 1.1115 |
| IC | H2F  | C1F  | *C2F  | H2G  | 1.1115 | 107.93 | -117.30 | 109.04 | 1.1113 |
| IC | C1F  | C2F  | C3F   | C4F  | 1.4964 | 111.92 | 179.54  | 112.84 | 1.5310 |
| IC | C4F  | C2F  | *C3F  | H3F  | 1.5310 | 112.84 | -121.63 | 109.37 | 1.1145 |
| IC | H3F  | C2F  | *C3F  | H3G  | 1.1145 | 109.37 | -117.07 | 109.08 | 1.1157 |
| IC | C2F  | C3F  | C4F   | C5F  | 1.5434 | 112.23 | 174.86  | 112.58 | 1.5342 |
| IC | C5F  | C3F  | *C4F  | H4F  | 1.5342 | 112.58 | -120.18 | 108.65 | 1.1140 |
| IC | H4F  | C3F  | *C4F  | H4G  | 1.1140 | 108.65 | -117.52 | 109.62 | 1.1127 |
| IC | C3F  | C4F  | C5F   | C6F  | 1.5340 | 112.58 | -174.06 | 112.39 | 1.5340 |
| IC | C6F  | C4F  | *C5F  | H5F  | 1.5340 | 112.39 | -122.01 | 109.38 | 1.1130 |
| IC | H5F  | C4F  | *C5F  | H5G  | 1.1130 | 109.38 | -117.34 | 108.92 | 1.1134 |
| IC | C4F  | C5F  | C6F   | C7F  | 1.5342 | 112.39 | 178.27  | 112.75 | 1.5340 |
| IC | C7F  | C5F  | *C6F  | H6F  | 1.5340 | 112.75 | -120.93 | 108.96 | 1.1137 |
| IC | H6F  | C5F  | *C6F  | H6G  | 1.1137 | 108.96 | -117.41 | 109.22 | 1.1131 |
| IC | C5F  | C6F  | C7F   | C8F  | 1.5340 | 112.75 | -178.89 | 112.33 | 1.5342 |
| IC | C8F  | C6F  | *C7F  | H7F  | 1.5342 | 112.33 | -121.40 | 109.26 | 1.1132 |
| IC | H7F  | C6F  | *C7F  | H7G  | 1.1132 | 109.26 | -117.45 | 109.12 | 1.1130 |
| IC | C6F  | C7F  | C8F   | C9F  | 1.5340 | 112.33 | 179.09  | 112.77 | 1.5340 |
| IC | C9F  | C7F  | *C8F  | H8F  | 1.5340 | 112.77 | -121.23 | 109.16 | 1.1134 |
| IC | H8F  | C7F  | *C8F  | H8G  | 1.1134 | 109.16 | -117.38 | 109.08 | 1.1133 |
| IC | C7F  | C8F  | C9F   | C10F | 1.5342 | 112.77 | 179.02  | 112.34 | 1.5343 |
| IC | C10F | C8F  | *C9F  | H9F  | 1.5343 | 112.34 | -121.27 | 109.27 | 1.1132 |
| IC | H9F  | C8F  | *C9F  | H9G  | 1.1132 | 109.27 | -117.45 | 109.10 | 1.1130 |
| IC | C8F  | C9F  | C10F  | C11F | 1.5340 | 112.34 | 178.16  | 112.74 | 1.5340 |
| IC | C11F | C9F  | *C10F | H10F | 1.5340 | 112.74 | -121.18 | 109.16 | 1.1134 |
| IC | H10F | C9F  | *C10F | H10G | 1.1134 | 109.16 | -117.35 | 109.10 | 1.1132 |
| IC | C9F  | C10F | C11F  | C12F | 1.5343 | 112.74 | 178.91  | 112.38 | 1.5343 |
| IC | C12F | C10F | *C11F | H11F | 1.5343 | 112.38 | -121.39 | 109.34 | 1.1131 |
| IC | H11F | C10F | *C11F | H11G | 1.1131 | 109.34 | -117.43 | 108.98 | 1.1132 |
| IC | C10F | C11F | C12F  | C13F | 1.5340 | 112.38 | 176.93  | 112.68 | 1.5340 |
| IC | C13F | C11F | *C12F | H12F | 1.5340 | 112.68 | -121.02 | 109.05 | 1.1134 |
| IC | H12F | C11F | *C12F | H12G | 1.1134 | 109.05 | -117.34 | 109.20 | 1.1131 |
| IC | C11F | C12F | C13F  | C14F | 1.5343 | 112.68 | -179.93 | 112.45 | 1.5345 |
| IC | C14F | C12F | *C13F | H13F | 1.5345 | 112.45 | -121.60 | 109.42 | 1.1129 |
| IC | H13F | C12F | *C13F | H13G | 1.1129 | 109.42 | -117.40 | 108.85 | 1.1134 |
| IC | C12F | C13F | C14F  | C15F | 1.5340 | 112.45 | 175.93  | 112.68 | 1.5334 |
| IC | C15F | C13F | *C14F | H14F | 1.5334 | 112.68 | -121.00 | 109.06 | 1.1131 |
| IC | H14F | C13F | *C14F | H14G | 1.1131 | 109.06 | -117.24 | 109.28 | 1.1130 |
| IC | C13F | C14F | C15F  | C16F | 1.5345 | 112.68 | -178.23 | 113.16 | 1.5306 |
| IC | C16F | C14F | *C15F | H15F | 1.5306 | 113.16 | -121.86 | 108.84 | 1.1140 |
| IC | H15F | C14F | *C15F | H15G | 1.1140 | 108.84 | -116.70 | 108.76 | 1.1144 |
| IC | C14F | C15F | C16F  | C17F | 1.5345 | 112.68 | -178.23 | 113.16 | 1.5306 |
| IC | C17F | C15F | *C16F | H16F | 1.5306 | 113.16 | -121.86 | 108.84 | 1.1140 |
| IC | H16F | C15F | *C16F | H16G | 1.1140 | 108.84 | -116.70 | 108.76 | 1.1144 |
| IC | C15F | C16F | C17F  | C18F | 1.5345 | 112.68 | -178.23 | 113.16 | 1.5306 |
| IC | C18F | C16F | *C17F | H17F | 1.5306 | 113.16 | -121.86 | 108.84 | 1.1140 |
| IC | H17F | C16F | *C17F | H17G | 1.1140 | 108.84 | -116.70 | 108.76 | 1.1144 |
| IC | C16F | C17F | C18F  | C19F | 1.5345 | 112.68 | -178.23 | 113.16 | 1.5306 |
| IC | C19F | C17F | *C18F | H18F | 1.5306 | 113.16 | -121.86 | 108.84 | 1.1140 |
| IC | H18F | C17F | *C18F | H18G | 1.1140 | 108.84 | -116.70 | 108.76 | 1.1144 |
| IC | C17F | C18F | C19F  | C20F | 1.5344 | 112.57 | 179.80  | 112.59 | 1.5346 |
| IC | C20F | C18F | *C19F | H19F | 1.5346 | 112.59 | -121.28 | 109.10 | 1.1133 |
| IC | H19F | C18F | *C19F | H19G | 1.1133 | 109.10 | -117.38 | 109.12 | 1.1133 |
| IC | C18F | C19F | C20F  | C21F | 1.5345 | 112.59 | -179.89 | 112.63 | 1.5337 |
| IC | C21F | C19F | *C20F | H20F | 1.5337 | 112.63 | -121.33 | 109.16 | 1.1133 |
| IC | H20F | C19F | *C20F | H20G | 1.1133 | 109.16 | -117.38 | 109.14 | 1.1133 |
| IC | C19F | C20F | C21F  | C22F | 1.5346 | 112.63 | 179.93  | 113.24 | 1.5309 |

|    |      |      |       |      |        |        |         |        |        |
|----|------|------|-------|------|--------|--------|---------|--------|--------|
| IC | C22F | C20F | *C21F | H21F | 1.5309 | 113.24 | -121.66 | 108.77 | 1.1142 |
| IC | H21F | C20F | *C21F | H21G | 1.1142 | 108.77 | -116.65 | 108.78 | 1.1142 |
| IC | C20F | C21F | C22F  | H22F | 1.5337 | 113.24 | -59.91  | 110.47 | 1.1114 |
| IC | H22F | C21F | *C22F | H22G | 1.1114 | 110.47 | 119.87  | 110.48 | 1.1113 |
| IC | H22F | C21F | *C22F | H22H | 1.1114 | 110.47 | -120.06 | 110.63 | 1.1113 |

PATCH FIRST NONE LAST NONE

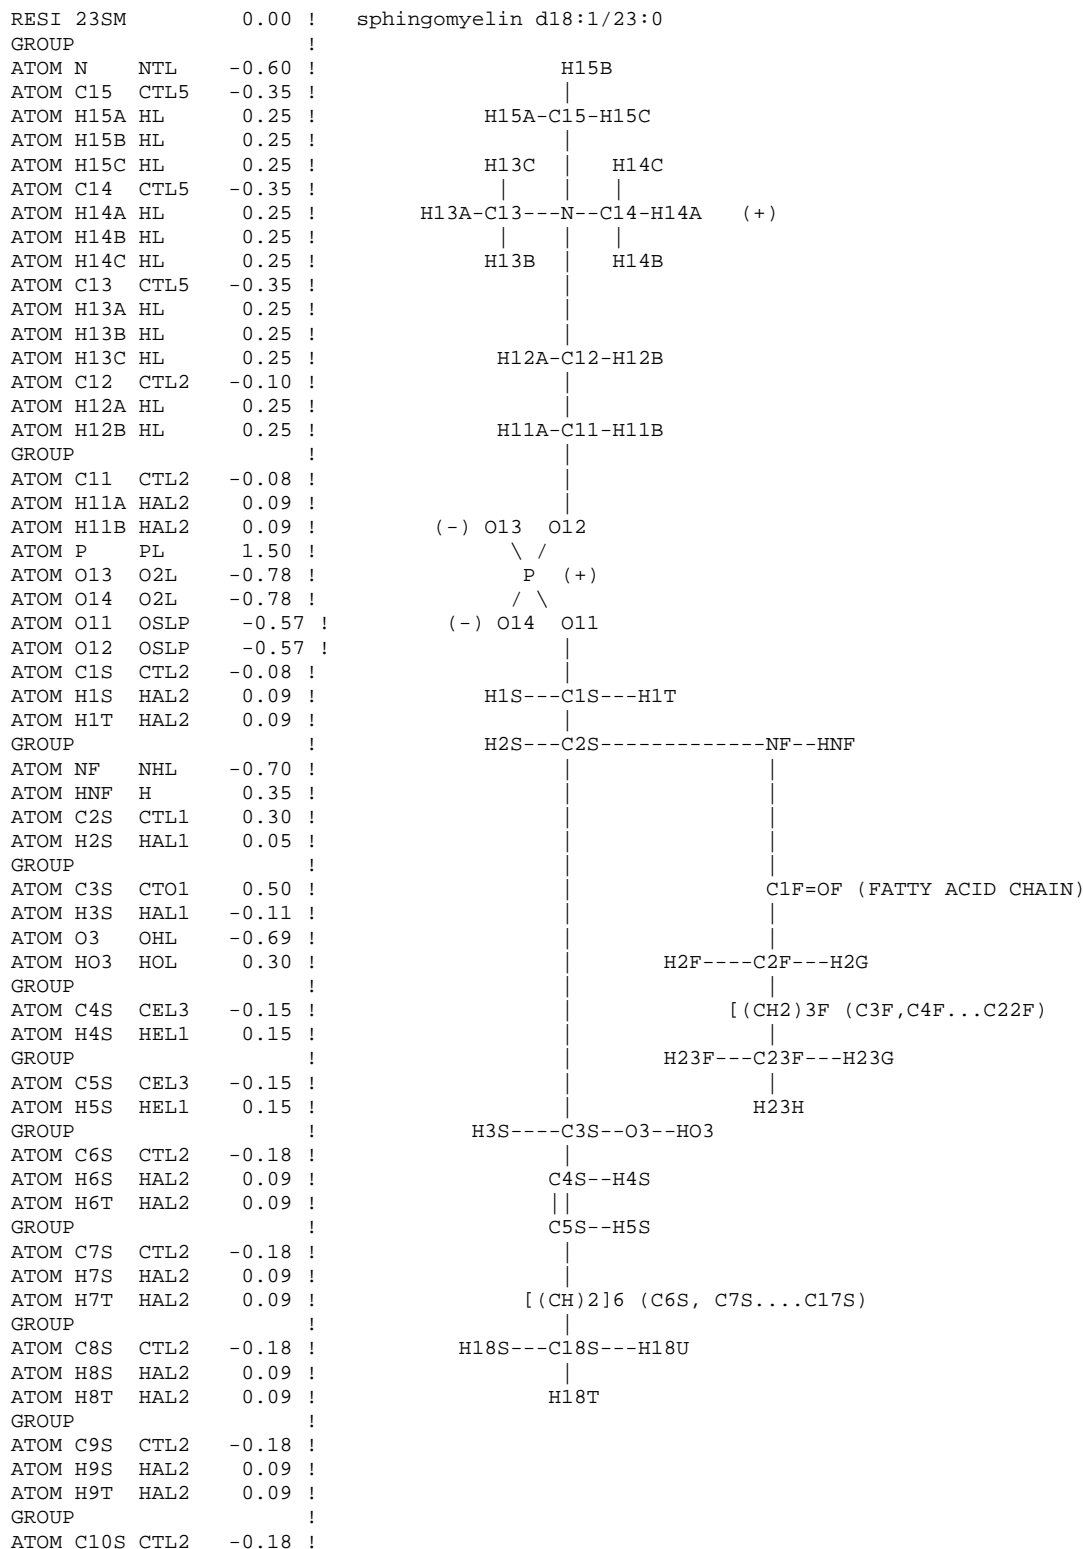

|           |      |       |                   |
|-----------|------|-------|-------------------|
| ATOM H10S | HAL2 | 0.09  | !                 |
| ATOM H10T | HAL2 | 0.09  | !                 |
| GROUP     |      |       |                   |
| ATOM C11S | CTL2 | -0.18 | !                 |
| ATOM H11S | HAL2 | 0.09  | !                 |
| ATOM H11T | HAL2 | 0.09  | !                 |
| GROUP     |      |       |                   |
| ATOM C12S | CTL2 | -0.18 | !                 |
| ATOM H12S | HAL2 | 0.09  | !                 |
| ATOM H12T | HAL2 | 0.09  | !                 |
| GROUP     |      |       |                   |
| ATOM C13S | CTL2 | -0.18 | !                 |
| ATOM H13S | HAL2 | 0.09  | !                 |
| ATOM H13T | HAL2 | 0.09  | !                 |
| GROUP     |      |       |                   |
| ATOM C14S | CTL2 | -0.18 | !                 |
| ATOM H14S | HAL2 | 0.09  | !                 |
| ATOM H14T | HAL2 | 0.09  | !                 |
| GROUP     |      |       |                   |
| ATOM C15S | CTL2 | -0.18 | !                 |
| ATOM H15S | HAL2 | 0.09  | !                 |
| ATOM H15T | HAL2 | 0.09  | !                 |
| GROUP     |      |       |                   |
| ATOM C16S | CTL2 | -0.18 | !                 |
| ATOM H16S | HAL2 | 0.09  | !                 |
| ATOM H16T | HAL2 | 0.09  | !                 |
| GROUP     |      |       |                   |
| ATOM C17S | CTL2 | -0.18 | !                 |
| ATOM H17S | HAL2 | 0.09  | !                 |
| ATOM H17T | HAL2 | 0.09  | !                 |
| GROUP     |      |       | !                 |
| ATOM C18S | CTL3 | -0.27 | !                 |
| ATOM H18S | HAL3 | 0.09  | !                 |
| ATOM H18T | HAL3 | 0.09  | !                 |
| ATOM H18U | HAL3 | 0.09  | !                 |
| GROUP     |      |       | !FATTY ACID CHAIN |
| ATOM C1F  | C    | 0.55  | !                 |
| ATOM OF   | O    | -0.60 | !                 |
| ATOM C2F  | CTL2 | -0.07 | !                 |
| ATOM H2F  | HAL2 | 0.06  | !                 |
| ATOM H2G  | HAL2 | 0.06  | !                 |
| GROUP     |      |       | !                 |
| ATOM C3F  | CTL2 | -0.18 | !                 |
| ATOM H3F  | HAL2 | 0.09  | !                 |
| ATOM H3G  | HAL2 | 0.09  | !                 |
| GROUP     |      |       | !                 |
| ATOM C4F  | CTL2 | -0.18 | !                 |
| ATOM H4F  | HAL2 | 0.09  | !                 |
| ATOM H4G  | HAL2 | 0.09  | !                 |
| GROUP     |      |       | !                 |
| ATOM C5F  | CTL2 | -0.18 | !                 |
| ATOM H5F  | HAL2 | 0.09  | !                 |
| ATOM H5G  | HAL2 | 0.09  | !                 |
| GROUP     |      |       | !                 |
| ATOM C6F  | CTL2 | -0.18 | !                 |
| ATOM H6F  | HAL2 | 0.09  | !                 |
| ATOM H6G  | HAL2 | 0.09  | !                 |
| GROUP     |      |       | !                 |
| ATOM C7F  | CTL2 | -0.18 | !                 |
| ATOM H7F  | HAL2 | 0.09  | !                 |
| ATOM H7G  | HAL2 | 0.09  | !                 |
| GROUP     |      |       | !                 |
| ATOM C8F  | CTL2 | -0.18 | !                 |
| ATOM H8F  | HAL2 | 0.09  | !                 |
| ATOM H8G  | HAL2 | 0.09  | !                 |
| GROUP     |      |       | !                 |
| ATOM C9F  | CTL2 | -0.18 | !                 |
| ATOM H9F  | HAL2 | 0.09  | !                 |
| ATOM H9G  | HAL2 | 0.09  | !                 |
| GROUP     |      |       | !                 |
| ATOM C10F | CTL2 | -0.18 | !                 |

|                |       |   |
|----------------|-------|---|
| ATOM H10F HAL2 | 0.09  | ! |
| ATOM H10G HAL2 | 0.09  | ! |
| GROUP          |       | ! |
| ATOM C11F CTL2 | -0.18 | ! |
| ATOM H11F HAL2 | 0.09  | ! |
| ATOM H11G HAL2 | 0.09  | ! |
| GROUP          |       | ! |
| ATOM C12F CTL2 | -0.18 | ! |
| ATOM H12F HAL2 | 0.09  | ! |
| ATOM H12G HAL2 | 0.09  | ! |
| GROUP          |       | ! |
| ATOM C13F CTL2 | -0.18 | ! |
| ATOM H13F HAL2 | 0.09  | ! |
| ATOM H13G HAL2 | 0.09  | ! |
| GROUP          |       | ! |
| ATOM C14F CTL2 | -0.18 | ! |
| ATOM H14F HAL2 | 0.09  | ! |
| ATOM H14G HAL2 | 0.09  | ! |
| GROUP          |       | ! |
| ATOM C15F CTL2 | -0.18 | ! |
| ATOM H15F HAL2 | 0.09  | ! |
| ATOM H15G HAL2 | 0.09  | ! |
| GROUP          |       | ! |
| ATOM C16F CTL2 | -0.18 | ! |
| ATOM H16F HAL2 | 0.09  | ! |
| ATOM H16G HAL2 | 0.09  | ! |
| GROUP          |       | ! |
| ATOM C17F CTL2 | -0.18 | ! |
| ATOM H17F HAL2 | 0.09  | ! |
| ATOM H17G HAL2 | 0.09  | ! |
| GROUP          |       | ! |
| ATOM C18F CTL2 | -0.18 | ! |
| ATOM H18F HAL2 | 0.09  | ! |
| ATOM H18G HAL2 | 0.09  | ! |
| GROUP          |       | ! |
| ATOM C19F CTL2 | -0.18 | ! |
| ATOM H19F HAL2 | 0.09  | ! |
| ATOM H19G HAL2 | 0.09  | ! |
| GROUP          |       | ! |
| ATOM C20F CTL2 | -0.18 | ! |
| ATOM H20F HAL2 | 0.09  | ! |
| ATOM H20G HAL2 | 0.09  | ! |
| GROUP          |       | ! |
| ATOM C21F CTL2 | -0.18 | ! |
| ATOM H21F HAL2 | 0.09  | ! |
| ATOM H21G HAL2 | 0.09  | ! |
| GROUP          |       | ! |
| ATOM C22F CTL2 | -0.18 | ! |
| ATOM H22F HAL2 | 0.09  | ! |
| ATOM H22G HAL2 | 0.09  | ! |
| GROUP          |       | ! |
| ATOM C23F CTL3 | -0.27 | ! |
| ATOM H23F HAL3 | 0.09  | ! |
| ATOM H23G HAL3 | 0.09  | ! |
| ATOM H23H HAL3 | 0.09  | ! |

!SPHINGOSINE CHAIN

|                                    |
|------------------------------------|
| BOND C18S H18S C18S H18T C18S H18U |
| BOND C18S C17S C17S H17S C17S H17T |
| BOND C17S C16S C16S H16S C16S H16T |
| BOND C16S C15S C15S H15S C15S H15T |
| BOND C15S C14S C14S H14S C14S H14T |
| BOND C14S C13S C13S H13S C13S H13T |
| BOND C13S C12S C12S H12S C12S H12T |
| BOND C12S C11S C11S H11S C11S H11T |
| BOND C11S C10S C10S H10S C10S H10T |
| BOND C10S C9S C9S H9S C9S H9T      |
| BOND C9S C8S C8S H8S C8S H8T       |
| BOND C8S C7S C7S H7S C7S H7T       |
| BOND C7S C6S C6S H6S C6S H6T       |
| BOND C6S C5S C5S H5S C4S H4S       |

BOND C4S C3S C3S H3S C3S O3  
 BOND O3 HO3  
 BOND C3S C2S C2S H2S  
 BOND C2S C1S C1S H1S C1S H1T  
 BOND C1S O11

!PHOSLPHOCHOLINE

BOND O11 P O12 P O13 P O14 P  
 BOND O12 C11 C11 H11A C11 H11B  
 BOND C11 C12 C12 H12A C12 H12B  
 BOND C12 N N C13 N C14 N C15  
 BOND C13 H13A C13 H13B C13 H13C  
 BOND C14 H14A C14 H14B C14 H14C  
 BOND C15 H15A C15 H15B C15 H15C

!FATTY ACID CHAIN

BOND C2S NF NF HNF NF C1F  
 BOND C1F C2F C2F H2F C2F H2G  
 BOND C2F C3F C3F H3F C3F H3G  
 BOND C3F C4F C4F H4F C4F H4G  
 BOND C4F C5F C5F H5F C5F H5G  
 BOND C5F C6F C6F H6F C6F H6G  
 BOND C6F C7F C7F H7F C7F H7G  
 BOND C7F C8F C8F H8F C8F H8G  
 BOND C8F C9F C9F H9F C9F H9G  
 BOND C9F C10F C10F H10F C10F H10G  
 BOND C10F C11F C11F H11F C11F H11G  
 BOND C11F C12F C12F H12F C12F H12G  
 BOND C12F C13F C13F H13F C13F H13G  
 BOND C13F C14F C14F H14F C14F H14G  
 BOND C14F C15F C15F H15F C15F H15G  
 BOND C15F C16F C16F H16F C16F H16G  
 BOND C16F C17F C17F H17F C17F H17G  
 BOND C17F C18F C18F H18F C18F H18G  
 BOND C18F C19F C19F H19F C19F H19G  
 BOND C19F C20F C20F H20F C20F H20G  
 BOND C20F C21F C21F H21F C21F H21G  
 BOND C21F C22F C22F H22F C22F H22G  
 BOND C22F C23F C23F H23F C23F H23G  
 BOND C23F H23H

DOUBLE C4S C5S

DOUBLE C1F OF

IMPR C1F C2F NF OF NF C1F C2S HNF

|    |      |      |      |      |        |        |         |        |        |
|----|------|------|------|------|--------|--------|---------|--------|--------|
| IC | C18S | C17S | C16S | C15S | 1.5309 | 113.23 | 180.00  | 112.64 | 1.5346 |
| IC | C17S | C16S | C15S | C14S | 1.5337 | 112.64 | 180.00  | 112.58 | 1.5345 |
| IC | C16S | C15S | C14S | C13S | 1.5346 | 112.58 | 180.00  | 112.58 | 1.5345 |
| IC | C15S | C14S | C13S | C12S | 1.5345 | 112.58 | -179.99 | 112.58 | 1.5345 |
| IC | C14S | C13S | C12S | C11S | 1.5345 | 112.58 | 179.97  | 112.58 | 1.5344 |
| IC | C13S | C12S | C11S | C10S | 1.5345 | 112.58 | -179.96 | 112.61 | 1.5345 |
| IC | C12S | C11S | C10S | C9S  | 1.5344 | 112.61 | 179.97  | 112.54 | 1.5344 |
| IC | C11S | C10S | C9S  | C8S  | 1.5345 | 112.54 | -179.87 | 112.66 | 1.5345 |
| IC | C10S | C9S  | C8S  | C7S  | 1.5344 | 112.66 | -179.89 | 112.50 | 1.5354 |
| IC | C9S  | C8S  | C7S  | C6S  | 1.5345 | 112.50 | -179.79 | 112.41 | 1.5391 |
| IC | C8S  | C7S  | C6S  | C5S  | 1.5354 | 112.41 | -179.61 | 111.46 | 1.5077 |
| IC | C7S  | C6S  | C5S  | C4S  | 1.5391 | 111.46 | -117.13 | 124.77 | 1.3444 |
| IC | C6S  | C5S  | C4S  | C3S  | 1.5077 | 124.77 | 179.01  | 124.28 | 1.5009 |
| IC | C5S  | C4S  | C3S  | C2S  | 1.3444 | 124.28 | -84.24  | 110.14 | 1.5343 |
| IC | C5S  | C4S  | C3S  | O3   | 1.3444 | 124.28 | 156.07  | 107.64 | 1.4235 |
| IC | C4S  | C3S  | C2S  | C1S  | 1.5009 | 110.14 | -70.50  | 114.25 | 1.5586 |
| IC | C13  | C12  | *N   | C14  | 1.4967 | 109.68 | 116.91  | 107.30 | 1.5040 |
| IC | C13  | C12  | *N   | C15  | 1.4967 | 109.68 | -123.42 | 110.88 | 1.4938 |
| IC | C12  | N    | C15  | H15A | 1.5212 | 110.88 | -177.15 | 111.31 | 1.0816 |
| IC | H15A | N    | *C15 | H15B | 1.0816 | 111.31 | 118.98  | 109.44 | 1.0875 |
| IC | H15A | N    | *C15 | H15C | 1.0816 | 111.31 | -122.11 | 111.46 | 1.0818 |
| IC | C12  | N    | C14  | H14A | 1.5212 | 107.30 | -178.89 | 114.23 | 1.0739 |
| IC | H14A | N    | *C14 | H14B | 1.0739 | 114.23 | 123.44  | 110.21 | 1.0968 |
| IC | H14A | N    | *C14 | H14C | 1.0739 | 114.23 | -124.43 | 111.41 | 1.0948 |
| IC | C12  | N    | C13  | H13A | 1.5212 | 109.68 | 176.44  | 111.15 | 1.0822 |
| IC | H13A | N    | *C13 | H13B | 1.0822 | 111.15 | 121.89  | 111.75 | 1.0814 |
| IC | H13A | N    | *C13 | H13C | 1.0822 | 111.15 | -118.50 | 109.57 | 1.0892 |
| IC | C13  | N    | C12  | C11  | 1.4967 | 109.68 | -178.83 | 116.30 | 1.5392 |

|    |      |      |       |      |        |        |         |        |        |
|----|------|------|-------|------|--------|--------|---------|--------|--------|
| IC | C11  | N    | *C12  | H12A | 1.5392 | 116.30 | 117.04  | 108.30 | 1.0985 |
| IC | C11  | N    | *C12  | H12B | 1.5392 | 116.30 | -126.61 | 112.36 | 1.0787 |
| IC | N    | C12  | C11   | O12  | 1.5212 | 116.30 | 126.79  | 107.85 | 1.4239 |
| IC | O12  | C12  | *C11  | H11A | 1.4239 | 107.85 | 118.10  | 109.30 | 1.1131 |
| IC | O12  | C12  | *C11  | H11B | 1.4239 | 107.85 | -123.12 | 113.16 | 1.1140 |
| IC | C12  | C11  | O12   | P    | 1.5392 | 107.85 | -68.29  | 118.09 | 1.5886 |
| IC | C11  | O12  | P     | O11  | 1.4239 | 118.09 | -167.58 | 104.18 | 1.5725 |
| IC | O11  | O12  | *P    | O13  | 1.5725 | 104.18 | 116.57  | 107.05 | 1.4823 |
| IC | O11  | O12  | *P    | O14  | 1.5725 | 104.18 | -118.73 | 106.98 | 1.4805 |
| IC | O12  | P    | O11   | C1S  | 1.5886 | 104.18 | 51.85   | 121.69 | 1.4327 |
| IC | P    | O11  | C1S   | C2S  | 1.5725 | 121.69 | 103.66  | 111.21 | 1.5586 |
| IC | C2S  | O11  | *C1S  | H1S  | 1.5586 | 111.21 | 118.79  | 108.35 | 1.1121 |
| IC | C2S  | O11  | *C1S  | H1T  | 1.5586 | 111.21 | -123.25 | 112.85 | 1.1152 |
| IC | O11  | C1S  | C2S   | C3S  | 1.4327 | 111.21 | 175.67  | 114.25 | 1.5343 |
| IC | C3S  | C1S  | *C2S  | NF   | 1.5343 | 114.25 | 120.00  | 111.52 | 1.4406 |
| IC | C3S  | C1S  | *C2S  | H2S  | 1.5343 | 114.25 | -120.00 | 105.03 | 1.1194 |
| IC | C1S  | C2S  | NF    | C1F  | 1.5586 | 111.52 | 160.94  | 124.85 | 1.3364 |
| IC | C1F  | C2S  | *NF   | HNF  | 1.3364 | 124.85 | -157.81 | 113.39 | 1.0062 |
| IC | C1S  | C2S  | C3S   | C4S  | 1.5586 | 114.25 | -70.50  | 110.14 | 1.5009 |
| IC | C4S  | C2S  | *C3S  | O3   | 1.5009 | 110.14 | 118.36  | 109.80 | 1.4235 |
| IC | C4S  | C2S  | *C3S  | H3S  | 1.5009 | 110.14 | -121.14 | 110.10 | 1.1140 |
| IC | C2S  | C3S  | O3    | HO3  | 1.5343 | 109.80 | 46.50   | 104.54 | 0.9610 |
| IC | C2S  | C3S  | C4S   | C5S  | 1.5343 | 110.14 | -84.24  | 124.28 | 1.3444 |
| IC | C5S  | C3S  | *C4S  | H4S  | 1.3444 | 124.28 | 178.79  | 115.93 | 1.1003 |
| IC | C3S  | C4S  | C5S   | C6S  | 1.5009 | 124.28 | 179.01  | 124.77 | 1.5077 |
| IC | C6S  | C4S  | *C5S  | H5S  | 1.5077 | 124.77 | -178.18 | 119.00 | 1.1029 |
| IC | C4S  | C5S  | C6S   | C7S  | 1.3444 | 124.77 | -117.13 | 111.46 | 1.5391 |
| IC | C7S  | C5S  | *C6S  | H6S  | 1.5391 | 111.46 | 120.98  | 111.41 | 1.1142 |
| IC | C7S  | C5S  | *C6S  | H6T  | 1.5391 | 111.46 | -120.60 | 109.91 | 1.1125 |
| IC | C5S  | C6S  | C7S   | C8S  | 1.5077 | 111.46 | -179.61 | 112.41 | 1.5354 |
| IC | C8S  | C6S  | *C7S  | H7S  | 1.5354 | 112.41 | 121.26  | 109.74 | 1.1138 |
| IC | C8S  | C6S  | *C7S  | H7T  | 1.5354 | 112.41 | -120.99 | 109.40 | 1.1147 |
| IC | C6S  | C7S  | C8S   | C9S  | 1.5391 | 112.41 | -179.79 | 112.50 | 1.5345 |
| IC | C9S  | C7S  | *C8S  | H8S  | 1.5345 | 112.50 | 121.20  | 108.97 | 1.1132 |
| IC | C9S  | C7S  | *C8S  | H8T  | 1.5345 | 112.50 | -121.38 | 109.07 | 1.1129 |
| IC | C7S  | C8S  | C9S   | C10S | 1.5354 | 112.50 | -179.89 | 112.66 | 1.5344 |
| IC | C10S | C8S  | *C9S  | H9S  | 1.5344 | 112.66 | 121.49  | 109.05 | 1.1133 |
| IC | C10S | C8S  | *C9S  | H9T  | 1.5344 | 112.66 | -121.38 | 108.96 | 1.1136 |
| IC | C8S  | C9S  | C10S  | C11S | 1.5345 | 112.66 | -179.87 | 112.54 | 1.5345 |
| IC | C11S | C9S  | *C10S | H10S | 1.5345 | 112.54 | 121.27  | 109.07 | 1.1133 |
| IC | C11S | C9S  | *C10S | H10T | 1.5345 | 112.54 | -121.34 | 109.11 | 1.1132 |
| IC | C9S  | C10S | C11S  | C12S | 1.5344 | 112.54 | 179.97  | 112.61 | 1.5344 |
| IC | C12S | C10S | *C11S | H11S | 1.5344 | 112.61 | 121.36  | 109.09 | 1.1133 |
| IC | C12S | C10S | *C11S | H11T | 1.5344 | 112.61 | -121.33 | 109.07 | 1.1134 |
| IC | C10S | C11S | C12S  | C13S | 1.5345 | 112.61 | -179.96 | 112.58 | 1.5345 |
| IC | C13S | C11S | *C12S | H12S | 1.5345 | 112.58 | 121.29  | 109.12 | 1.1133 |
| IC | C13S | C11S | *C12S | H12T | 1.5345 | 112.58 | -121.31 | 109.15 | 1.1133 |
| IC | C11S | C12S | C13S  | C14S | 1.5344 | 112.58 | 179.97  | 112.58 | 1.5345 |
| IC | C14S | C12S | *C13S | H13S | 1.5345 | 112.58 | 121.30  | 109.13 | 1.1133 |
| IC | C14S | C12S | *C13S | H13T | 1.5345 | 112.58 | -121.30 | 109.13 | 1.1133 |
| IC | C12S | C13S | C14S  | C15S | 1.5345 | 112.58 | -179.99 | 112.58 | 1.5345 |
| IC | C15S | C13S | *C14S | H14S | 1.5345 | 112.58 | 121.30  | 109.12 | 1.1133 |
| IC | C15S | C13S | *C14S | H14T | 1.5345 | 112.58 | -121.31 | 109.12 | 1.1133 |
| IC | C13S | C14S | C15S  | C16S | 1.5345 | 112.58 | 180.00  | 112.58 | 1.5346 |
| IC | C16S | C14S | *C15S | H15S | 1.5346 | 112.58 | 121.30  | 109.11 | 1.1133 |
| IC | C16S | C14S | *C15S | H15T | 1.5346 | 112.58 | -121.30 | 109.11 | 1.1133 |
| IC | C14S | C15S | C16S  | C17S | 1.5345 | 112.58 | 180.00  | 112.64 | 1.5337 |
| IC | C17S | C15S | *C16S | H16S | 1.5337 | 112.64 | 121.32  | 109.14 | 1.1133 |
| IC | C17S | C15S | *C16S | H16T | 1.5337 | 112.64 | -121.32 | 109.14 | 1.1133 |
| IC | C15S | C16S | C17S  | C18S | 1.5346 | 112.64 | 180.00  | 113.23 | 1.5309 |
| IC | C18S | C16S | *C17S | H17S | 1.5309 | 113.23 | 121.67  | 108.77 | 1.1142 |
| IC | C18S | C16S | *C17S | H17T | 1.5309 | 113.23 | -121.67 | 108.77 | 1.1142 |
| IC | C16S | C17S | C18S  | H18S | 1.5337 | 113.23 | 180.00  | 110.63 | 1.1113 |
| IC | H18S | C17S | *C18S | H18T | 1.1113 | 110.63 | 120.07  | 110.47 | 1.1114 |
| IC | H18S | C17S | *C18S | H18U | 1.1113 | 110.63 | -120.07 | 110.47 | 1.1114 |
| IC | C2S  | NF   | C1F   | C2F  | 1.4406 | 124.85 | -156.83 | 114.97 | 1.4964 |
| IC | C2F  | NF   | *C1F  | OF   | 1.4964 | 114.97 | 162.54  | 122.11 | 1.2268 |
| IC | NF   | C1F  | C2F   | C3F  | 1.3364 | 114.97 | -146.57 | 111.92 | 1.5432 |
| IC | C3F  | C1F  | *C2F  | H2F  | 1.5432 | 111.92 | -120.83 | 107.93 | 1.1115 |
| IC | H2F  | C1F  | *C2F  | H2G  | 1.1115 | 107.93 | -117.30 | 109.04 | 1.1113 |
| IC | C1F  | C2F  | C3F   | C4F  | 1.4964 | 111.92 | 179.54  | 112.84 | 1.5310 |



|    |      |      |       |      |        |        |         |        |        |
|----|------|------|-------|------|--------|--------|---------|--------|--------|
| IC | C4F  | C2F  | *C3F  | H3F  | 1.5310 | 112.84 | -121.63 | 109.37 | 1.1145 |
| IC | H3F  | C2F  | *C3F  | H3G  | 1.1145 | 109.37 | -117.07 | 109.08 | 1.1157 |
| IC | C2F  | C3F  | C4F   | C5F  | 1.5434 | 112.23 | 174.86  | 112.58 | 1.5342 |
| IC | C5F  | C3F  | *C4F  | H4F  | 1.5342 | 112.58 | -120.18 | 108.65 | 1.1140 |
| IC | H4F  | C3F  | *C4F  | H4G  | 1.1140 | 108.65 | -117.52 | 109.62 | 1.1127 |
| IC | C3F  | C4F  | C5F   | C6F  | 1.5340 | 112.58 | -174.06 | 112.39 | 1.5340 |
| IC | C6F  | C4F  | *C5F  | H5F  | 1.5340 | 112.39 | -122.01 | 109.38 | 1.1130 |
| IC | H5F  | C4F  | *C5F  | H5G  | 1.1130 | 109.38 | -117.34 | 108.92 | 1.1134 |
| IC | C4F  | C5F  | C6F   | C7F  | 1.5342 | 112.39 | 178.27  | 112.75 | 1.5340 |
| IC | C7F  | C5F  | *C6F  | H6F  | 1.5340 | 112.75 | -120.93 | 108.96 | 1.1137 |
| IC | H6F  | C5F  | *C6F  | H6G  | 1.1137 | 108.96 | -117.41 | 109.22 | 1.1131 |
| IC | C5F  | C6F  | C7F   | C8F  | 1.5340 | 112.75 | -178.89 | 112.33 | 1.5342 |
| IC | C8F  | C6F  | *C7F  | H7F  | 1.5342 | 112.33 | -121.40 | 109.26 | 1.1132 |
| IC | H7F  | C6F  | *C7F  | H7G  | 1.1132 | 109.26 | -117.45 | 109.12 | 1.1130 |
| IC | C6F  | C7F  | C8F   | C9F  | 1.5340 | 112.33 | 179.09  | 112.77 | 1.5340 |
| IC | C9F  | C7F  | *C8F  | H8F  | 1.5340 | 112.77 | -121.23 | 109.16 | 1.1134 |
| IC | H8F  | C7F  | *C8F  | H8G  | 1.1134 | 109.16 | -117.38 | 109.08 | 1.1133 |
| IC | C7F  | C8F  | C9F   | C10F | 1.5342 | 112.77 | 179.02  | 112.34 | 1.5343 |
| IC | C10F | C8F  | *C9F  | H9F  | 1.5343 | 112.34 | -121.27 | 109.27 | 1.1132 |
| IC | H9F  | C8F  | *C9F  | H9G  | 1.1132 | 109.27 | -117.45 | 109.10 | 1.1130 |
| IC | C8F  | C9F  | C10F  | C11F | 1.5340 | 112.34 | 178.16  | 112.74 | 1.5340 |
| IC | C11F | C9F  | *C10F | H10F | 1.5340 | 112.74 | -121.18 | 109.16 | 1.1134 |
| IC | H10F | C9F  | *C10F | H10G | 1.1134 | 109.16 | -117.35 | 109.10 | 1.1132 |
| IC | C9F  | C10F | C11F  | C12F | 1.5343 | 112.74 | 178.91  | 112.38 | 1.5343 |
| IC | C12F | C10F | *C11F | H11F | 1.5343 | 112.38 | -121.39 | 109.34 | 1.1131 |
| IC | H11F | C10F | *C11F | H11G | 1.1131 | 109.34 | -117.43 | 108.98 | 1.1132 |
| IC | C10F | C11F | C12F  | C13F | 1.5340 | 112.38 | 176.93  | 112.68 | 1.5340 |
| IC | C13F | C11F | *C12F | H12F | 1.5340 | 112.68 | -121.02 | 109.05 | 1.1134 |
| IC | H12F | C11F | *C12F | H12G | 1.1134 | 109.05 | -117.34 | 109.20 | 1.1131 |
| IC | C11F | C12F | C13F  | C14F | 1.5343 | 112.68 | -179.93 | 112.45 | 1.5345 |
| IC | C14F | C12F | *C13F | H13F | 1.5345 | 112.45 | -121.60 | 109.42 | 1.1129 |
| IC | H13F | C12F | *C13F | H13G | 1.1129 | 109.42 | -117.40 | 108.85 | 1.1134 |
| IC | C12F | C13F | C14F  | C15F | 1.5340 | 112.45 | 175.93  | 112.68 | 1.5334 |
| IC | C15F | C13F | *C14F | H14F | 1.5334 | 112.68 | -121.00 | 109.06 | 1.1131 |
| IC | H14F | C13F | *C14F | H14G | 1.1131 | 109.06 | -117.24 | 109.28 | 1.1130 |
| IC | C13F | C14F | C15F  | C16F | 1.5345 | 112.68 | -178.23 | 113.16 | 1.5306 |
| IC | C16F | C14F | *C15F | H15F | 1.5306 | 113.16 | -121.86 | 108.84 | 1.1140 |
| IC | H15F | C14F | *C15F | H15G | 1.1140 | 108.84 | -116.70 | 108.76 | 1.1144 |
| IC | C14F | C15F | C16F  | C17F | 1.5345 | 112.68 | -178.23 | 113.16 | 1.5306 |
| IC | C17F | C15F | *C16F | H16F | 1.5306 | 113.16 | -121.86 | 108.84 | 1.1140 |
| IC | H16F | C15F | *C16F | H16G | 1.1140 | 108.84 | -116.70 | 108.76 | 1.1144 |
| IC | C15F | C16F | C17F  | C18F | 1.5345 | 112.68 | -178.23 | 113.16 | 1.5306 |
| IC | C18F | C16F | *C17F | H17F | 1.5306 | 113.16 | -121.86 | 108.84 | 1.1140 |
| IC | H17F | C16F | *C17F | H17G | 1.1140 | 108.84 | -116.70 | 108.76 | 1.1144 |
| IC | C16F | C17F | C18F  | C19F | 1.5345 | 112.68 | -178.23 | 113.16 | 1.5306 |
| IC | C19F | C17F | *C18F | H18F | 1.5306 | 113.16 | -121.86 | 108.84 | 1.1140 |
| IC | H18F | C17F | *C18F | H18G | 1.1140 | 108.84 | -116.70 | 108.76 | 1.1144 |
| IC | C17F | C18F | C19F  | C20F | 1.5344 | 112.57 | 179.80  | 112.59 | 1.5346 |
| IC | C20F | C18F | *C19F | H19F | 1.5346 | 112.59 | -121.28 | 109.10 | 1.1133 |
| IC | H19F | C18F | *C19F | H19G | 1.1133 | 109.10 | -117.38 | 109.12 | 1.1133 |
| IC | C18F | C19F | C20F  | C21F | 1.5345 | 112.59 | -179.89 | 112.63 | 1.5337 |
| IC | C21F | C19F | *C20F | H20F | 1.5337 | 112.63 | -121.33 | 109.16 | 1.1133 |
| IC | H20F | C19F | *C20F | H20G | 1.1133 | 109.16 | -117.38 | 109.14 | 1.1133 |
| IC | C19F | C20F | C21F  | C22F | 1.5346 | 112.63 | 179.93  | 113.24 | 1.5309 |
| IC | C22F | C20F | *C21F | H21F | 1.5309 | 113.24 | -121.66 | 108.77 | 1.1142 |
| IC | H21F | C20F | *C21F | H21G | 1.1142 | 108.77 | -116.65 | 108.78 | 1.1142 |
| IC | C20F | C21F | C22F  | C23F | 1.5346 | 112.63 | 179.93  | 113.24 | 1.5309 |
| IC | C23F | C21F | *C22F | H22F | 1.5309 | 113.24 | -121.66 | 108.77 | 1.1142 |
| IC | H22F | C21F | *C22F | H22G | 1.1142 | 108.77 | -116.65 | 108.78 | 1.1142 |
| IC | C21F | C22F | C23F  | H23F | 1.5337 | 113.24 | -59.91  | 110.47 | 1.1114 |
| IC | H23F | C22F | *C23F | H23G | 1.1114 | 110.47 | 119.87  | 110.48 | 1.1113 |
| IC | H23F | C22F | *C23F | H23H | 1.1114 | 110.47 | -120.06 | 110.63 | 1.1113 |

PATCH FIRST NONE LAST NONE

```

RESI LSM          0.00 !   sphingomyelin d18:1/24:0
GROUP              !
ATOM N      NTL    -0.60 !           H15B
ATOM C15    CTL5   -0.35 !           |
ATOM H15A   HL      0.25 !           H15A-C15-H15C
ATOM H15B   HL      0.25 !           |
ATOM H15C   HL      0.25 !           H13C | H14C

```

|           |      |         |
|-----------|------|---------|
| ATOM C14  | CTL5 | -0.35 ! |
| ATOM H14A | HL   | 0.25 !  |
| ATOM H14B | HL   | 0.25 !  |
| ATOM H14C | HL   | 0.25 !  |
| ATOM C13  | CTL5 | -0.35 ! |
| ATOM H13A | HL   | 0.25 !  |
| ATOM H13B | HL   | 0.25 !  |
| ATOM H13C | HL   | 0.25 !  |
| ATOM C12  | CTL2 | -0.10 ! |
| ATOM H12A | HL   | 0.25 !  |
| ATOM H12B | HL   | 0.25 !  |
| GROUP     |      | !       |
| ATOM C11  | CTL2 | -0.08 ! |
| ATOM H11A | HAL2 | 0.09 !  |
| ATOM H11B | HAL2 | 0.09 !  |
| ATOM P    | PL   | 1.50 !  |
| ATOM O13  | O2L  | -0.78 ! |
| ATOM O14  | O2L  | -0.78 ! |
| ATOM O11  | OSLP | -0.57 ! |
| ATOM O12  | OSLP | -0.57 ! |
| ATOM C1S  | CTL2 | -0.08 ! |
| ATOM H1S  | HAL2 | 0.09 !  |
| ATOM H1T  | HAL2 | 0.09 !  |
| GROUP     |      | !       |
| ATOM NF   | NHL  | -0.70 ! |
| ATOM HNF  | H    | 0.35 !  |
| ATOM C2S  | CTL1 | 0.30 !  |
| ATOM H2S  | HAL1 | 0.05 !  |
| GROUP     |      | !       |
| ATOM C3S  | CTO1 | 0.50 !  |
| ATOM H3S  | HAL1 | -0.11 ! |
| ATOM O3   | OHL  | -0.69 ! |
| ATOM HO3  | HOL  | 0.30 !  |
| GROUP     |      | !       |
| ATOM C4S  | CEL3 | -0.15 ! |
| ATOM H4S  | HEL1 | 0.15 !  |
| GROUP     |      | !       |
| ATOM C5S  | CEL3 | -0.15 ! |
| ATOM H5S  | HEL1 | 0.15 !  |
| GROUP     |      | !       |
| ATOM C6S  | CTL2 | -0.18 ! |
| ATOM H6S  | HAL2 | 0.09 !  |
| ATOM H6T  | HAL2 | 0.09 !  |
| GROUP     |      | !       |
| ATOM C7S  | CTL2 | -0.18 ! |
| ATOM H7S  | HAL2 | 0.09 !  |
| ATOM H7T  | HAL2 | 0.09 !  |
| GROUP     |      | !       |
| ATOM C8S  | CTL2 | -0.18 ! |
| ATOM H8S  | HAL2 | 0.09 !  |
| ATOM H8T  | HAL2 | 0.09 !  |
| GROUP     |      | !       |
| ATOM C9S  | CTL2 | -0.18 ! |
| ATOM H9S  | HAL2 | 0.09 !  |
| ATOM H9T  | HAL2 | 0.09 !  |
| GROUP     |      | !       |
| ATOM C10S | CTL2 | -0.18 ! |
| ATOM H10S | HAL2 | 0.09 !  |
| ATOM H10T | HAL2 | 0.09 !  |
| GROUP     |      | !       |
| ATOM C11S | CTL2 | -0.18 ! |
| ATOM H11S | HAL2 | 0.09 !  |
| ATOM H11T | HAL2 | 0.09 !  |
| GROUP     |      | !       |
| ATOM C12S | CTL2 | -0.18 ! |
| ATOM H12S | HAL2 | 0.09 !  |
| ATOM H12T | HAL2 | 0.09 !  |
| GROUP     |      | !       |
| ATOM C13S | CTL2 | -0.18 ! |
| ATOM H13S | HAL2 | 0.09 !  |
| ATOM H13T | HAL2 | 0.09 !  |

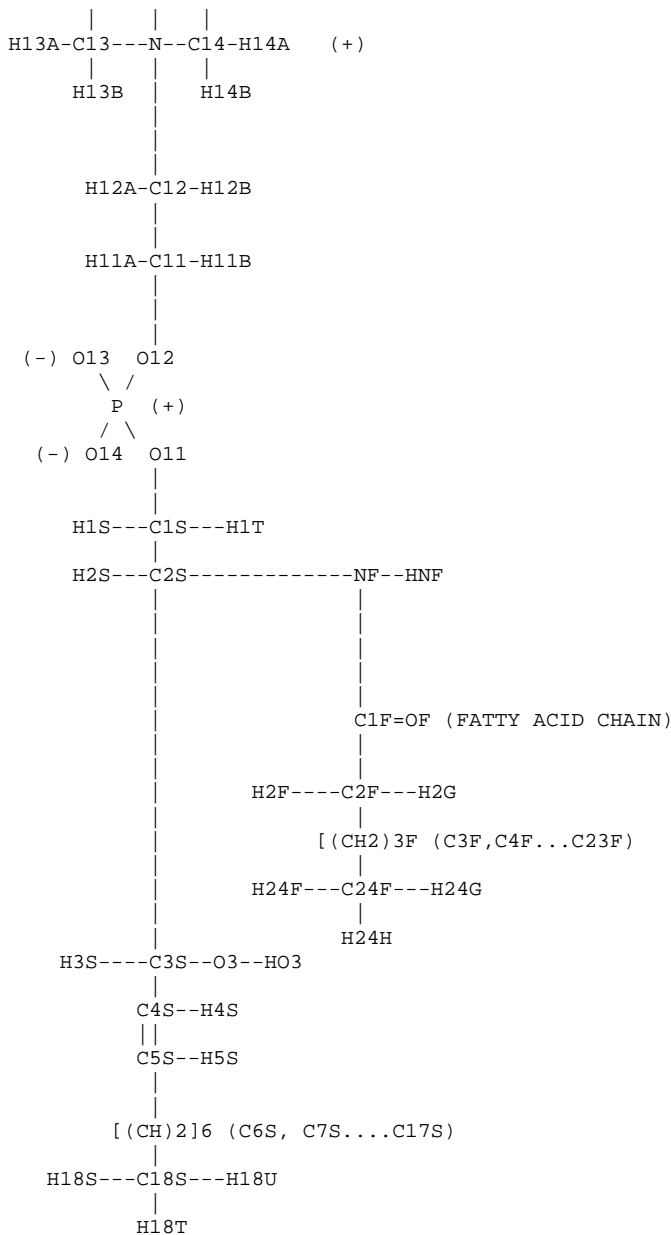

```

GROUP
ATOM C14S CTL2 -0.18 !
ATOM H14S HAL2 0.09 !
ATOM H14T HAL2 0.09 !
GROUP
ATOM C15S CTL2 -0.18 !
ATOM H15S HAL2 0.09 !
ATOM H15T HAL2 0.09 !
GROUP
ATOM C16S CTL2 -0.18 !
ATOM H16S HAL2 0.09 !
ATOM H16T HAL2 0.09 !
GROUP
ATOM C17S CTL2 -0.18 !
ATOM H17S HAL2 0.09 !
ATOM H17T HAL2 0.09 !
GROUP
ATOM C18S CTL3 -0.27 !
ATOM H18S HAL3 0.09 !
ATOM H18T HAL3 0.09 !
ATOM H18U HAL3 0.09 !
GROUP
ATOM C1F C 0.55 !
ATOM OF O -0.60 !
ATOM C2F CTL2 -0.07 !
ATOM H2F HAL2 0.06 !
ATOM H2G HAL2 0.06 !
GROUP
ATOM C3F CTL2 -0.18 !
ATOM H3F HAL2 0.09 !
ATOM H3G HAL2 0.09 !
GROUP
ATOM C4F CTL2 -0.18 !
ATOM H4F HAL2 0.09 !
ATOM H4G HAL2 0.09 !
GROUP
ATOM C5F CTL2 -0.18 !
ATOM H5F HAL2 0.09 !
ATOM H5G HAL2 0.09 !
GROUP
ATOM C6F CTL2 -0.18 !
ATOM H6F HAL2 0.09 !
ATOM H6G HAL2 0.09 !
GROUP
ATOM C7F CTL2 -0.18 !
ATOM H7F HAL2 0.09 !
ATOM H7G HAL2 0.09 !
GROUP
ATOM C8F CTL2 -0.18 !
ATOM H8F HAL2 0.09 !
ATOM H8G HAL2 0.09 !
GROUP
ATOM C9F CTL2 -0.18 !
ATOM H9F HAL2 0.09 !
ATOM H9G HAL2 0.09 !
GROUP
ATOM C10F CTL2 -0.18 !
ATOM H10F HAL2 0.09 !
ATOM H10G HAL2 0.09 !
GROUP
ATOM C11F CTL2 -0.18 !
ATOM H11F HAL2 0.09 !
ATOM H11G HAL2 0.09 !
GROUP
ATOM C12F CTL2 -0.18 !
ATOM H12F HAL2 0.09 !
ATOM H12G HAL2 0.09 !
GROUP
ATOM C13F CTL2 -0.18 !
ATOM H13F HAL2 0.09 !
ATOM H13G HAL2 0.09 !
!FATTY ACID CHAIN

```

```

GROUP          !
ATOM C14F CTL2 -0.18 !
ATOM H14F HAL2  0.09 !
ATOM H14G HAL2  0.09 !
GROUP          !
ATOM C15F CTL2 -0.18 !
ATOM H15F HAL2  0.09 !
ATOM H15G HAL2  0.09 !
GROUP          !
ATOM C16F CTL2 -0.18 !
ATOM H16F HAL2  0.09 !
ATOM H16G HAL2  0.09 !
GROUP          !
ATOM C17F CTL2 -0.18 !
ATOM H17F HAL2  0.09 !
ATOM H17G HAL2  0.09 !
GROUP          !
ATOM C18F CTL2 -0.18 !
ATOM H18F HAL2  0.09 !
ATOM H18G HAL2  0.09 !
GROUP          !
ATOM C19F CTL2 -0.18 !
ATOM H19F HAL2  0.09 !
ATOM H19G HAL2  0.09 !
GROUP          !
ATOM C20F CTL2 -0.18 !
ATOM H20F HAL2  0.09 !
ATOM H20G HAL2  0.09 !
GROUP          !
ATOM C21F CTL2 -0.18 !
ATOM H21F HAL2  0.09 !
ATOM H21G HAL2  0.09 !
GROUP          !
ATOM C22F CTL2 -0.18 !
ATOM H22F HAL2  0.09 !
ATOM H22G HAL2  0.09 !
GROUP          !
ATOM C23F CTL2 -0.18 !
ATOM H23F HAL2  0.09 !
ATOM H23G HAL2  0.09 !
GROUP          !
ATOM C24F CTL3 -0.27 !
ATOM H24F HAL3  0.09 !
ATOM H24G HAL3  0.09 !
ATOM H24H HAL3  0.09 !

```

!SPHINGOSINE CHAIN

```

BOND C18S H18S C18S H18T C18S H18U
BOND C18S C17S C17S H17S C17S H17T
BOND C17S C16S C16S H16S C16S H16T
BOND C16S C15S C15S H15S C15S H15T
BOND C15S C14S C14S H14S C14S H14T
BOND C14S C13S C13S H13S C13S H13T
BOND C13S C12S C12S H12S C12S H12T
BOND C12S C11S C11S H11S C11S H11T
BOND C11S C10S C10S H10S C10S H10T
BOND C10S C9S C9S H9S C9S H9T
BOND C9S C8S C8S H8S C8S H8T
BOND C8S C7S C7S H7S C7S H7T
BOND C7S C6S C6S H6S C6S H6T
BOND C6S C5S C5S H5S C4S H4S
BOND C4S C3S C3S H3S C3S O3
BOND O3 HO3
BOND C3S C2S C2S H2S
BOND C2S C1S C1S H1S C1S H1T
BOND C1S O11

```

!PHOSLPHOCHOLINE

```

BOND O11 P O12 P O13 P O14 P
BOND O12 C11 C11 H11A C11 H11B
BOND C11 C12 C12 H12A C12 H12B
BOND C12 N N C13 N C14 N C15

```

BOND C13 H13A C13 H13B C13 H13C  
 BOND C14 H14A C14 H14B C14 H14C  
 BOND C15 H15A C15 H15B C15 H15C  
 !FATTY ACID CHAIN  
 BOND C2S NF NF HNF NF C1F  
 BOND C1F C2F C2F H2F C2F H2G  
 BOND C2F C3F C3F H3F C3F H3G  
 BOND C3F C4F C4F H4F C4F H4G  
 BOND C4F C5F C5F H5F C5F H5G  
 BOND C5F C6F C6F H6F C6F H6G  
 BOND C6F C7F C7F H7F C7F H7G  
 BOND C7F C8F C8F H8F C8F H8G  
 BOND C8F C9F C9F H9F C9F H9G  
 BOND C9F C10F C10F H10F C10F H10G  
 BOND C10F C11F C11F H11F C11F H11G  
 BOND C11F C12F C12F H12F C12F H12G  
 BOND C12F C13F C13F H13F C13F H13G  
 BOND C13F C14F C14F H14F C14F H14G  
 BOND C14F C15F C15F H15F C15F H15G  
 BOND C15F C16F C16F H16F C16F H16G  
 BOND C16F C17F C17F H17F C17F H17G  
 BOND C17F C18F C18F H18F C18F H18G  
 BOND C18F C19F C19F H19F C19F H19G  
 BOND C19F C20F C20F H20F C20F H20G  
 BOND C20F C21F C21F H21F C21F H21G  
 BOND C21F C22F C22F H22F C22F H22G  
 BOND C22F C23F C23F H23F C23F H23G  
 BOND C23F C24F C24F H24F C24F H24G  
 BOND C24F H24H

DOUBLE C4S C5S  
 DOUBLE C1F OF  
 IMPR C1F C2F NF OF NF C1F C2S HNF

|    |      |      |      |      |        |        |         |        |        |
|----|------|------|------|------|--------|--------|---------|--------|--------|
| IC | C18S | C17S | C16S | C15S | 1.5309 | 113.23 | 180.00  | 112.64 | 1.5346 |
| IC | C17S | C16S | C15S | C14S | 1.5337 | 112.64 | 180.00  | 112.58 | 1.5345 |
| IC | C16S | C15S | C14S | C13S | 1.5346 | 112.58 | 180.00  | 112.58 | 1.5345 |
| IC | C15S | C14S | C13S | C12S | 1.5345 | 112.58 | -179.99 | 112.58 | 1.5345 |
| IC | C14S | C13S | C12S | C11S | 1.5345 | 112.58 | 179.97  | 112.58 | 1.5344 |
| IC | C13S | C12S | C11S | C10S | 1.5345 | 112.58 | -179.96 | 112.61 | 1.5345 |
| IC | C12S | C11S | C10S | C9S  | 1.5344 | 112.61 | 179.97  | 112.54 | 1.5344 |
| IC | C11S | C10S | C9S  | C8S  | 1.5345 | 112.54 | -179.87 | 112.66 | 1.5345 |
| IC | C10S | C9S  | C8S  | C7S  | 1.5344 | 112.66 | -179.89 | 112.50 | 1.5354 |
| IC | C9S  | C8S  | C7S  | C6S  | 1.5345 | 112.50 | -179.79 | 112.41 | 1.5391 |
| IC | C8S  | C7S  | C6S  | C5S  | 1.5354 | 112.41 | -179.61 | 111.46 | 1.5077 |
| IC | C7S  | C6S  | C5S  | C4S  | 1.5391 | 111.46 | -117.13 | 124.77 | 1.3444 |
| IC | C6S  | C5S  | C4S  | C3S  | 1.5077 | 124.77 | 179.01  | 124.28 | 1.5009 |
| IC | C5S  | C4S  | C3S  | C2S  | 1.3444 | 124.28 | -84.24  | 110.14 | 1.5343 |
| IC | C5S  | C4S  | C3S  | O3   | 1.3444 | 124.28 | 156.07  | 107.64 | 1.4235 |
| IC | C4S  | C3S  | C2S  | C1S  | 1.5009 | 110.14 | -70.50  | 114.25 | 1.5586 |
| IC | C13  | C12  | *N   | C14  | 1.4967 | 109.68 | 116.91  | 107.30 | 1.5040 |
| IC | C13  | C12  | *N   | C15  | 1.4967 | 109.68 | -123.42 | 110.88 | 1.4938 |
| IC | C12  | N    | C15  | H15A | 1.5212 | 110.88 | -177.15 | 111.31 | 1.0816 |
| IC | H15A | N    | *C15 | H15B | 1.0816 | 111.31 | 118.98  | 109.44 | 1.0875 |
| IC | H15A | N    | *C15 | H15C | 1.0816 | 111.31 | -122.11 | 111.46 | 1.0818 |
| IC | C12  | N    | C14  | H14A | 1.5212 | 107.30 | -178.89 | 114.23 | 1.0739 |
| IC | H14A | N    | *C14 | H14B | 1.0739 | 114.23 | 123.44  | 110.21 | 1.0968 |
| IC | H14A | N    | *C14 | H14C | 1.0739 | 114.23 | -124.43 | 111.41 | 1.0948 |
| IC | C12  | N    | C13  | H13A | 1.5212 | 109.68 | 176.44  | 111.15 | 1.0822 |
| IC | H13A | N    | *C13 | H13B | 1.0822 | 111.15 | 121.89  | 111.75 | 1.0814 |
| IC | H13A | N    | *C13 | H13C | 1.0822 | 111.15 | -118.50 | 109.57 | 1.0892 |
| IC | C13  | N    | C12  | C11  | 1.4967 | 109.68 | -178.83 | 116.30 | 1.5392 |
| IC | C11  | N    | *C12 | H12A | 1.5392 | 116.30 | 117.04  | 108.30 | 1.0985 |
| IC | C11  | N    | *C12 | H12B | 1.5392 | 116.30 | -126.61 | 112.36 | 1.0787 |
| IC | N    | C12  | C11  | O12  | 1.5212 | 116.30 | 126.79  | 107.85 | 1.4239 |
| IC | O12  | C12  | *C11 | H11A | 1.4239 | 107.85 | 118.10  | 109.30 | 1.1131 |
| IC | O12  | C12  | *C11 | H11B | 1.4239 | 107.85 | -123.12 | 113.16 | 1.1140 |
| IC | C12  | C11  | O12  | P    | 1.5392 | 107.85 | -68.29  | 118.09 | 1.5886 |
| IC | C11  | O12  | P    | O11  | 1.4239 | 118.09 | -167.58 | 104.18 | 1.5725 |
| IC | O11  | O12  | *P   | O13  | 1.5725 | 104.18 | 116.57  | 107.05 | 1.4823 |
| IC | O11  | O12  | *P   | O14  | 1.5725 | 104.18 | -118.73 | 106.98 | 1.4805 |

|    |      |      |       |      |        |        |         |        |        |
|----|------|------|-------|------|--------|--------|---------|--------|--------|
| IC | O12  | P    | O11   | C1S  | 1.5886 | 104.18 | 51.85   | 121.69 | 1.4327 |
| IC | P    | O11  | C1S   | C2S  | 1.5725 | 121.69 | 103.66  | 111.21 | 1.5586 |
| IC | C2S  | O11  | *C1S  | H1S  | 1.5586 | 111.21 | 118.79  | 108.35 | 1.1121 |
| IC | C2S  | O11  | *C1S  | H1T  | 1.5586 | 111.21 | -123.25 | 112.85 | 1.1152 |
| IC | O11  | C1S  | C2S   | C3S  | 1.4327 | 111.21 | 175.67  | 114.25 | 1.5343 |
| IC | C3S  | C1S  | *C2S  | NF   | 1.5343 | 114.25 | 120.00  | 111.52 | 1.4406 |
| IC | C3S  | C1S  | *C2S  | H2S  | 1.5343 | 114.25 | -120.00 | 105.03 | 1.1194 |
| IC | C1S  | C2S  | NF    | C1F  | 1.5586 | 111.52 | 160.94  | 124.85 | 1.3364 |
| IC | C1F  | C2S  | *NF   | HNF  | 1.3364 | 124.85 | -157.81 | 113.39 | 1.0062 |
| IC | C1S  | C2S  | C3S   | C4S  | 1.5586 | 114.25 | -70.50  | 110.14 | 1.5009 |
| IC | C4S  | C2S  | *C3S  | O3   | 1.5009 | 110.14 | 118.36  | 109.80 | 1.4235 |
| IC | C4S  | C2S  | *C3S  | H3S  | 1.5009 | 110.14 | -121.14 | 110.10 | 1.1140 |
| IC | C2S  | C3S  | O3    | HO3  | 1.5343 | 109.80 | 46.50   | 104.54 | 0.9610 |
| IC | C2S  | C3S  | C4S   | C5S  | 1.5343 | 110.14 | -84.24  | 124.28 | 1.3444 |
| IC | C5S  | C3S  | *C4S  | H4S  | 1.3444 | 124.28 | 178.79  | 115.93 | 1.1003 |
| IC | C3S  | C4S  | C5S   | C6S  | 1.5009 | 124.28 | 179.01  | 124.77 | 1.5077 |
| IC | C6S  | C4S  | *C5S  | H5S  | 1.5077 | 124.77 | -178.18 | 119.00 | 1.1029 |
| IC | C4S  | C5S  | C6S   | C7S  | 1.3444 | 124.77 | -117.13 | 111.46 | 1.5391 |
| IC | C7S  | C5S  | *C6S  | H6S  | 1.5391 | 111.46 | 120.98  | 111.41 | 1.1142 |
| IC | C7S  | C5S  | *C6S  | H6T  | 1.5391 | 111.46 | -120.60 | 109.91 | 1.1125 |
| IC | C5S  | C6S  | C7S   | C8S  | 1.5077 | 111.46 | -179.61 | 112.41 | 1.5354 |
| IC | C8S  | C6S  | *C7S  | H7S  | 1.5354 | 112.41 | 121.26  | 109.74 | 1.1138 |
| IC | C8S  | C6S  | *C7S  | H7T  | 1.5354 | 112.41 | -120.99 | 109.40 | 1.1147 |
| IC | C6S  | C7S  | C8S   | C9S  | 1.5391 | 112.41 | -179.79 | 112.50 | 1.5345 |
| IC | C9S  | C7S  | *C8S  | H8S  | 1.5345 | 112.50 | 121.20  | 108.97 | 1.1132 |
| IC | C9S  | C7S  | *C8S  | H8T  | 1.5345 | 112.50 | -121.38 | 109.07 | 1.1129 |
| IC | C7S  | C8S  | C9S   | C10S | 1.5354 | 112.50 | -179.89 | 112.66 | 1.5344 |
| IC | C10S | C8S  | *C9S  | H9S  | 1.5344 | 112.66 | 121.49  | 109.05 | 1.1133 |
| IC | C10S | C8S  | *C9S  | H9T  | 1.5344 | 112.66 | -121.38 | 108.96 | 1.1136 |
| IC | C8S  | C9S  | C10S  | C11S | 1.5345 | 112.66 | -179.87 | 112.54 | 1.5345 |
| IC | C11S | C9S  | *C10S | H10S | 1.5345 | 112.54 | 121.27  | 109.07 | 1.1133 |
| IC | C11S | C9S  | *C10S | H10T | 1.5345 | 112.54 | -121.34 | 109.11 | 1.1132 |
| IC | C9S  | C10S | C11S  | C12S | 1.5344 | 112.54 | 179.97  | 112.61 | 1.5344 |
| IC | C12S | C10S | *C11S | H11S | 1.5344 | 112.61 | 121.36  | 109.09 | 1.1133 |
| IC | C12S | C10S | *C11S | H11T | 1.5344 | 112.61 | -121.33 | 109.07 | 1.1134 |
| IC | C10S | C11S | C12S  | C13S | 1.5345 | 112.61 | -179.96 | 112.58 | 1.5345 |
| IC | C13S | C11S | *C12S | H12S | 1.5345 | 112.58 | 121.29  | 109.12 | 1.1133 |
| IC | C13S | C11S | *C12S | H12T | 1.5345 | 112.58 | -121.31 | 109.15 | 1.1133 |
| IC | C11S | C12S | C13S  | C14S | 1.5344 | 112.58 | 179.97  | 112.58 | 1.5345 |
| IC | C14S | C12S | *C13S | H13S | 1.5345 | 112.58 | 121.30  | 109.13 | 1.1133 |
| IC | C14S | C12S | *C13S | H13T | 1.5345 | 112.58 | -121.30 | 109.13 | 1.1133 |
| IC | C12S | C13S | C14S  | C15S | 1.5345 | 112.58 | -179.99 | 112.58 | 1.5345 |
| IC | C15S | C13S | *C14S | H14S | 1.5345 | 112.58 | 121.30  | 109.12 | 1.1133 |
| IC | C15S | C13S | *C14S | H14T | 1.5345 | 112.58 | -121.31 | 109.12 | 1.1133 |
| IC | C13S | C14S | C15S  | C16S | 1.5345 | 112.58 | 180.00  | 112.58 | 1.5346 |
| IC | C16S | C14S | *C15S | H15S | 1.5346 | 112.58 | 121.30  | 109.11 | 1.1133 |
| IC | C16S | C14S | *C15S | H15T | 1.5346 | 112.58 | -121.30 | 109.11 | 1.1133 |
| IC | C14S | C15S | C16S  | C17S | 1.5345 | 112.58 | 180.00  | 112.64 | 1.5337 |
| IC | C17S | C15S | *C16S | H16S | 1.5337 | 112.64 | 121.32  | 109.14 | 1.1133 |
| IC | C17S | C15S | *C16S | H16T | 1.5337 | 112.64 | -121.32 | 109.14 | 1.1133 |
| IC | C15S | C16S | C17S  | C18S | 1.5346 | 112.64 | 180.00  | 113.23 | 1.5309 |
| IC | C18S | C16S | *C17S | H17S | 1.5309 | 113.23 | 121.67  | 108.77 | 1.1142 |
| IC | C18S | C16S | *C17S | H17T | 1.5309 | 113.23 | -121.67 | 108.77 | 1.1142 |
| IC | C16S | C17S | C18S  | H18S | 1.5337 | 113.23 | 180.00  | 110.63 | 1.1113 |
| IC | H18S | C17S | *C18S | H18T | 1.1113 | 110.63 | 120.07  | 110.47 | 1.1114 |
| IC | H18S | C17S | *C18S | H18U | 1.1113 | 110.63 | -120.07 | 110.47 | 1.1114 |
| IC | C2S  | NF   | C1F   | C2F  | 1.4406 | 124.85 | -156.83 | 114.97 | 1.4964 |
| IC | C2F  | NF   | *C1F  | OF   | 1.4964 | 114.97 | 162.54  | 122.11 | 1.2268 |
| IC | NF   | C1F  | C2F   | C3F  | 1.3364 | 114.97 | -146.57 | 111.92 | 1.5432 |
| IC | C3F  | C1F  | *C2F  | H2F  | 1.5432 | 111.92 | -120.83 | 107.93 | 1.1115 |
| IC | H2F  | C1F  | *C2F  | H2G  | 1.1115 | 107.93 | -117.30 | 109.04 | 1.1113 |
| IC | C1F  | C2F  | C3F   | C4F  | 1.4964 | 111.92 | 179.54  | 112.84 | 1.5310 |
| IC | C4F  | C2F  | *C3F  | H3F  | 1.5310 | 112.84 | -121.63 | 109.37 | 1.1145 |
| IC | H3F  | C2F  | *C3F  | H3G  | 1.1145 | 109.37 | -117.07 | 109.08 | 1.1157 |
| IC | C2F  | C3F  | C4F   | C5F  | 1.5434 | 112.23 | 174.86  | 112.58 | 1.5342 |
| IC | C5F  | C3F  | *C4F  | H4F  | 1.5342 | 112.58 | -120.18 | 108.65 | 1.1140 |
| IC | H4F  | C3F  | *C4F  | H4G  | 1.1140 | 108.65 | -117.52 | 109.62 | 1.1127 |
| IC | C3F  | C4F  | C5F   | C6F  | 1.5340 | 112.58 | -174.06 | 112.39 | 1.5340 |
| IC | C6F  | C4F  | *C5F  | H5F  | 1.5340 | 112.39 | -122.01 | 109.38 | 1.1130 |
| IC | H5F  | C4F  | *C5F  | H5G  | 1.1130 | 109.38 | -117.34 | 108.92 | 1.1134 |
| IC | C4F  | C5F  | C6F   | C7F  | 1.5342 | 112.39 | 178.27  | 112.75 | 1.5340 |

|    |      |      |       |      |        |        |         |        |        |
|----|------|------|-------|------|--------|--------|---------|--------|--------|
| IC | C7F  | C5F  | *C6F  | H6F  | 1.5340 | 112.75 | -120.93 | 108.96 | 1.1137 |
| IC | H6F  | C5F  | *C6F  | H6G  | 1.1137 | 108.96 | -117.41 | 109.22 | 1.1131 |
| IC | C5F  | C6F  | *C7F  | C8F  | 1.5340 | 112.75 | -178.89 | 112.33 | 1.5342 |
| IC | C8F  | C6F  | *C7F  | H7F  | 1.5342 | 112.33 | -121.40 | 109.26 | 1.1132 |
| IC | H7F  | C6F  | *C7F  | H7G  | 1.1132 | 109.26 | -117.45 | 109.12 | 1.1130 |
| IC | C6F  | C7F  | *C8F  | C9F  | 1.5340 | 112.33 | 179.09  | 112.77 | 1.5340 |
| IC | C9F  | C7F  | *C8F  | H8F  | 1.5340 | 112.77 | -121.23 | 109.16 | 1.1134 |
| IC | H8F  | C7F  | *C8F  | H8G  | 1.1134 | 109.16 | -117.38 | 109.08 | 1.1133 |
| IC | C7F  | C8F  | *C9F  | C10F | 1.5342 | 112.77 | 179.02  | 112.34 | 1.5343 |
| IC | C10F | C8F  | *C9F  | H9F  | 1.5343 | 112.34 | -121.27 | 109.27 | 1.1132 |
| IC | H9F  | C8F  | *C9F  | H9G  | 1.1132 | 109.27 | -117.45 | 109.10 | 1.1130 |
| IC | C8F  | C9F  | *C10F | C11F | 1.5340 | 112.34 | 178.16  | 112.74 | 1.5340 |
| IC | C11F | C9F  | *C10F | H10F | 1.5340 | 112.74 | -121.18 | 109.16 | 1.1134 |
| IC | H10F | C9F  | *C10F | H10G | 1.1134 | 109.16 | -117.35 | 109.10 | 1.1132 |
| IC | C9F  | C10F | *C11F | C12F | 1.5343 | 112.74 | 178.91  | 112.38 | 1.5343 |
| IC | C12F | C10F | *C11F | H11F | 1.5343 | 112.38 | -121.39 | 109.34 | 1.1131 |
| IC | H11F | C10F | *C11F | H11G | 1.1131 | 109.34 | -117.43 | 108.98 | 1.1132 |
| IC | C10F | C11F | *C12F | C13F | 1.5340 | 112.38 | 176.93  | 112.68 | 1.5340 |
| IC | C13F | C11F | *C12F | H12F | 1.5340 | 112.68 | -121.02 | 109.05 | 1.1134 |
| IC | H12F | C11F | *C12F | H12G | 1.1134 | 109.05 | -117.34 | 109.20 | 1.1131 |
| IC | C11F | C12F | *C13F | C14F | 1.5343 | 112.68 | -179.93 | 112.45 | 1.5345 |
| IC | C14F | C12F | *C13F | H13F | 1.5345 | 112.45 | -121.60 | 109.42 | 1.1129 |
| IC | H13F | C12F | *C13F | H13G | 1.1129 | 109.42 | -117.40 | 108.85 | 1.1134 |
| IC | C12F | C13F | *C14F | C15F | 1.5340 | 112.45 | 175.93  | 112.68 | 1.5334 |
| IC | C15F | C13F | *C14F | H14F | 1.5334 | 112.68 | -121.00 | 109.06 | 1.1131 |
| IC | H14F | C13F | *C14F | H14G | 1.1131 | 109.06 | -117.24 | 109.28 | 1.1130 |
| IC | C13F | C14F | *C15F | C16F | 1.5345 | 112.68 | -178.23 | 113.16 | 1.5306 |
| IC | C16F | C14F | *C15F | H15F | 1.5306 | 113.16 | -121.86 | 108.84 | 1.1140 |
| IC | H15F | C14F | *C15F | H15G | 1.1140 | 108.84 | -116.70 | 108.76 | 1.1144 |
| IC | C14F | C15F | *C16F | C17F | 1.5345 | 112.68 | -178.23 | 113.16 | 1.5306 |
| IC | C17F | C15F | *C16F | H16F | 1.5306 | 113.16 | -121.86 | 108.84 | 1.1140 |
| IC | H16F | C15F | *C16F | H16G | 1.1140 | 108.84 | -116.70 | 108.76 | 1.1144 |
| IC | C15F | C16F | *C17F | C18F | 1.5345 | 112.68 | -178.23 | 113.16 | 1.5306 |
| IC | C18F | C16F | *C17F | H17F | 1.5306 | 113.16 | -121.86 | 108.84 | 1.1140 |
| IC | H17F | C16F | *C17F | H17G | 1.1140 | 108.84 | -116.70 | 108.76 | 1.1144 |
| IC | C16F | C17F | *C18F | C19F | 1.5345 | 112.68 | -178.23 | 113.16 | 1.5306 |
| IC | C19F | C17F | *C18F | H18F | 1.5306 | 113.16 | -121.86 | 108.84 | 1.1140 |
| IC | H18F | C17F | *C18F | H18G | 1.1140 | 108.84 | -116.70 | 108.76 | 1.1144 |
| IC | C17F | C18F | *C19F | C20F | 1.5344 | 112.57 | 179.80  | 112.59 | 1.5346 |
| IC | C20F | C18F | *C19F | H19F | 1.5346 | 112.59 | -121.28 | 109.10 | 1.1133 |
| IC | H19F | C18F | *C19F | H19G | 1.1133 | 109.10 | -117.38 | 109.12 | 1.1133 |
| IC | C18F | C19F | *C20F | C21F | 1.5345 | 112.59 | -179.89 | 112.63 | 1.5337 |
| IC | C21F | C19F | *C20F | H20F | 1.5337 | 112.63 | -121.33 | 109.16 | 1.1133 |
| IC | H20F | C19F | *C20F | H20G | 1.1133 | 109.16 | -117.38 | 109.14 | 1.1133 |
| IC | C19F | C20F | *C21F | C22F | 1.5346 | 112.63 | 179.93  | 113.24 | 1.5309 |
| IC | C22F | C20F | *C21F | H21F | 1.5309 | 113.24 | -121.66 | 108.77 | 1.1142 |
| IC | H21F | C20F | *C21F | H21G | 1.1142 | 108.77 | -116.65 | 108.78 | 1.1142 |
| IC | C20F | C21F | *C22F | C23F | 1.5346 | 112.63 | 179.93  | 113.24 | 1.5309 |
| IC | C23F | C21F | *C22F | H22F | 1.5309 | 113.24 | -121.66 | 108.77 | 1.1142 |
| IC | H22F | C21F | *C22F | H22G | 1.1142 | 108.77 | -116.65 | 108.78 | 1.1142 |
| IC | C21F | C22F | *C23F | C24F | 1.5346 | 112.63 | 179.93  | 113.24 | 1.5309 |
| IC | C24F | C22F | *C23F | H23F | 1.5309 | 113.24 | -121.66 | 108.77 | 1.1142 |
| IC | H23F | C22F | *C23F | H23G | 1.1142 | 108.77 | -116.65 | 108.78 | 1.1142 |
| IC | C22F | C23F | *C24F | H24F | 1.5337 | 113.24 | -59.91  | 110.47 | 1.1114 |
| IC | H24F | C23F | *C24F | H24G | 1.1114 | 110.47 | 119.87  | 110.48 | 1.1113 |
| IC | H24F | C23F | *C24F | H24H | 1.1114 | 110.47 | -120.06 | 110.63 | 1.1113 |

PATCH FIRST NONE LAST NONE

RESI NSM 0.00 ! sphingomyelin d18:1/24:1 (w/nervonic acid)

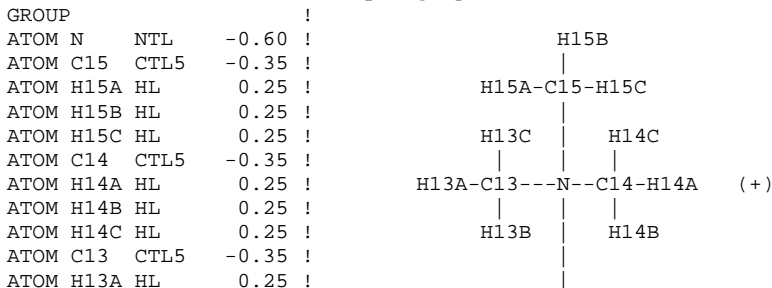





|           |      |       |                   |
|-----------|------|-------|-------------------|
| ATOM H15S | HAL2 | 0.09  | !                 |
| ATOM H15T | HAL2 | 0.09  | !                 |
| GROUP     |      |       |                   |
| ATOM C16S | CTL2 | -0.18 | !                 |
| ATOM H16S | HAL2 | 0.09  | !                 |
| ATOM H16T | HAL2 | 0.09  | !                 |
| GROUP     |      |       |                   |
| ATOM C17S | CTL2 | -0.18 | !                 |
| ATOM H17S | HAL2 | 0.09  | !                 |
| ATOM H17T | HAL2 | 0.09  | !                 |
| GROUP     |      |       | !                 |
| ATOM C18S | CTL3 | -0.27 | !                 |
| ATOM H18S | HAL3 | 0.09  | !                 |
| ATOM H18T | HAL3 | 0.09  | !                 |
| ATOM H18U | HAL3 | 0.09  | !                 |
| GROUP     |      |       | !FATTY ACID CHAIN |
| ATOM C1F  | C    | 0.55  | !                 |
| ATOM OF   | O    | -0.60 | !                 |
| ATOM C2F  | CTL2 | -0.07 | !                 |
| ATOM H2F  | HAL2 | 0.06  | !                 |
| ATOM H2G  | HAL2 | 0.06  | !                 |
| GROUP     |      |       | !                 |
| ATOM C3F  | CTL2 | -0.18 | !                 |
| ATOM H3F  | HAL2 | 0.09  | !                 |
| ATOM H3G  | HAL2 | 0.09  | !                 |
| GROUP     |      |       | !                 |
| ATOM C4F  | CTL2 | -0.18 | !                 |
| ATOM H4F  | HAL2 | 0.09  | !                 |
| ATOM H4G  | HAL2 | 0.09  | !                 |
| GROUP     |      |       | !                 |
| ATOM C5F  | CTL2 | -0.18 | !                 |
| ATOM H5F  | HAL2 | 0.09  | !                 |
| ATOM H5G  | HAL2 | 0.09  | !                 |
| GROUP     |      |       | !                 |
| ATOM C6F  | CTL2 | -0.18 | !                 |
| ATOM H6F  | HAL2 | 0.09  | !                 |
| ATOM H6G  | HAL2 | 0.09  | !                 |
| GROUP     |      |       | !                 |
| ATOM C7F  | CTL2 | -0.18 | !                 |
| ATOM H7F  | HAL2 | 0.09  | !                 |
| ATOM H7G  | HAL2 | 0.09  | !                 |
| GROUP     |      |       | !                 |
| ATOM C8F  | CTL2 | -0.18 | !                 |
| ATOM H8F  | HAL2 | 0.09  | !                 |
| ATOM H8G  | HAL2 | 0.09  | !                 |
| GROUP     |      |       | !                 |
| ATOM C9F  | CTL2 | -0.18 | !                 |
| ATOM H9F  | HAL2 | 0.09  | !                 |
| ATOM H9G  | HAL2 | 0.09  | !                 |
| GROUP     |      |       | !                 |
| ATOM C10F | CTL2 | -0.18 | !                 |
| ATOM H10F | HAL2 | 0.09  | !                 |
| ATOM H10G | HAL2 | 0.09  | !                 |
| GROUP     |      |       | !                 |
| ATOM C11F | CTL2 | -0.18 | !                 |
| ATOM H11F | HAL2 | 0.09  | !                 |
| ATOM H11G | HAL2 | 0.09  | !                 |
| GROUP     |      |       | !                 |
| ATOM C12F | CTL2 | -0.18 | !                 |
| ATOM H12F | HAL2 | 0.09  | !                 |
| ATOM H12G | HAL2 | 0.09  | !                 |
| GROUP     |      |       | !                 |
| ATOM C13F | CTL2 | -0.18 | !                 |
| ATOM H13F | HAL2 | 0.09  | !                 |
| ATOM H13G | HAL2 | 0.09  | !                 |
| GROUP     |      |       | !                 |
| ATOM C14F | CTL2 | -0.18 | !                 |
| ATOM H14F | HAL2 | 0.09  | !                 |
| ATOM H14G | HAL2 | 0.09  | !                 |
| GROUP     |      |       | !                 |
| ATOM C15F | CEL1 | -0.15 | !                 |

ATOM H15F HEL1 0.15 !  
 GROUP !  
 ATOM C16F CEL1 -0.15 !  
 ATOM H16F HEL1 0.15 !  
 GROUP !  
 ATOM C17F CTL2 -0.18 !  
 ATOM H17F HAL2 0.09 !  
 ATOM H17G HAL2 0.09 !  
 GROUP !  
 ATOM C18F CTL2 -0.18 !  
 ATOM H18F HAL2 0.09 !  
 ATOM H18G HAL2 0.09 !  
 GROUP !  
 ATOM C19F CTL2 -0.18 !  
 ATOM H19F HAL2 0.09 !  
 ATOM H19G HAL2 0.09 !  
 GROUP !  
 ATOM C20F CTL2 -0.18 !  
 ATOM H20F HAL2 0.09 !  
 ATOM H20G HAL2 0.09 !  
 GROUP !  
 ATOM C21F CTL2 -0.18 !  
 ATOM H21F HAL2 0.09 !  
 ATOM H21G HAL2 0.09 !  
 GROUP !  
 ATOM C22F CTL2 -0.18 !  
 ATOM H22F HAL2 0.09 !  
 ATOM H22G HAL2 0.09 !  
 GROUP !  
 ATOM C23F CTL2 -0.18 !  
 ATOM H23F HAL2 0.09 !  
 ATOM H23G HAL2 0.09 !  
 GROUP !  
 ATOM C24F CTL3 -0.27 !  
 ATOM H24F HAL3 0.09 !  
 ATOM H24G HAL3 0.09 !  
 ATOM H24H HAL3 0.09 !

!SPHINGOSINE CHAIN

BOND C18S H18S C18S H18T C18S H18U  
 BOND C18S C17S C17S H17S C17S H17T  
 BOND C17S C16S C16S H16S C16S H16T  
 BOND C16S C15S C15S H15S C15S H15T  
 BOND C15S C14S C14S H14S C14S H14T  
 BOND C14S C13S C13S H13S C13S H13T  
 BOND C13S C12S C12S H12S C12S H12T  
 BOND C12S C11S C11S H11S C11S H11T  
 BOND C11S C10S C10S H10S C10S H10T  
 BOND C10S C9S C9S H9S C9S H9T  
 BOND C9S C8S C8S H8S C8S H8T  
 BOND C8S C7S C7S H7S C7S H7T  
 BOND C7S C6S C6S H6S C6S H6T  
 BOND C6S C5S C5S H5S C4S H4S  
 BOND C4S C3S C3S H3S C3S O3  
 BOND O3 HO3  
 BOND C3S C2S C2S H2S  
 BOND C2S C1S C1S H1S C1S H1T  
 BOND C1S O11

!PHOSLPHOCHOLINE

BOND O11 P O12 P O13 P O14 P  
 BOND O12 C11 C11 H11A C11 H11B  
 BOND C11 C12 C12 H12A C12 H12B  
 BOND C12 N N C13 N C14 N C15  
 BOND C13 H13A C13 H13B C13 H13C  
 BOND C14 H14A C14 H14B C14 H14C  
 BOND C15 H15A C15 H15B C15 H15C

!FATTY ACID CHAIN

BOND C2S NF NF HNF NF C1F  
 BOND C1F C2F C2F H2F C2F H2G  
 BOND C2F C3F C3F H3F C3F H3G  
 BOND C3F C4F C4F H4F C4F H4G

BOND C4F C5F C5F H5F C5F H5G  
 BOND C5F C6F C6F H6F C6F H6G  
 BOND C6F C7F C7F H7F C7F H7G  
 BOND C7F C8F C8F H8F C8F H8G  
 BOND C8F C9F C9F H9F C9F H9G  
 BOND C9F C10F C10F H10F C10F H10G  
 BOND C10F C11F C11F H11F C11F H11G  
 BOND C11F C12F C12F H12F C12F H12G  
 BOND C12F C13F C13F H13F C13F H13G  
 BOND C13F C14F C14F H14F C14F H14G  
 BOND C14F C15F C15F H15F  
 BOND C16F H16F  
 BOND C16F C17F C17F H17F C17F H17G  
 BOND C17F C18F C18F H18F C18F H18G  
 BOND C18F C19F C19F H19F C19F H19G  
 BOND C19F C20F C20F H20F C20F H20G  
 BOND C20F C21F C21F H21F C21F H21G  
 BOND C21F C22F C22F H22F C22F H22G  
 BOND C22F C23F C23F H23F C23F H23G  
 BOND C23F C24F C24F H24F C24F H24G  
 BOND C24F H24H

DOUBLE C4S C5S  
 DOUBLE C15F C16F  
 DOUBLE C1F OF  
 IMPR C1F C2F NF OF NF C1F C2S HNF

|    |      |      |      |      |        |        |         |        |        |
|----|------|------|------|------|--------|--------|---------|--------|--------|
| IC | C18S | C17S | C16S | C15S | 1.5309 | 113.23 | 180.00  | 112.64 | 1.5346 |
| IC | C17S | C16S | C15S | C14S | 1.5337 | 112.64 | 180.00  | 112.58 | 1.5345 |
| IC | C16S | C15S | C14S | C13S | 1.5346 | 112.58 | 180.00  | 112.58 | 1.5345 |
| IC | C15S | C14S | C13S | C12S | 1.5345 | 112.58 | -179.99 | 112.58 | 1.5345 |
| IC | C14S | C13S | C12S | C11S | 1.5345 | 112.58 | 179.97  | 112.58 | 1.5344 |
| IC | C13S | C12S | C11S | C10S | 1.5345 | 112.58 | -179.96 | 112.61 | 1.5345 |
| IC | C12S | C11S | C10S | C9S  | 1.5344 | 112.61 | 179.97  | 112.54 | 1.5344 |
| IC | C11S | C10S | C9S  | C8S  | 1.5345 | 112.54 | -179.87 | 112.66 | 1.5345 |
| IC | C10S | C9S  | C8S  | C7S  | 1.5344 | 112.66 | -179.89 | 112.50 | 1.5354 |
| IC | C9S  | C8S  | C7S  | C6S  | 1.5345 | 112.50 | -179.79 | 112.41 | 1.5391 |
| IC | C8S  | C7S  | C6S  | C5S  | 1.5354 | 112.41 | -179.61 | 111.46 | 1.5077 |
| IC | C7S  | C6S  | C5S  | C4S  | 1.5391 | 111.46 | -117.13 | 124.77 | 1.3444 |
| IC | C6S  | C5S  | C4S  | C3S  | 1.5077 | 124.77 | 179.01  | 124.28 | 1.5009 |
| IC | C5S  | C4S  | C3S  | C2S  | 1.3444 | 124.28 | -84.24  | 110.14 | 1.5343 |
| IC | C5S  | C4S  | C3S  | O3   | 1.3444 | 124.28 | 156.07  | 107.64 | 1.4235 |
| IC | C4S  | C3S  | C2S  | C1S  | 1.5009 | 110.14 | -70.50  | 114.25 | 1.5586 |
| IC | C13  | C12  | *N   | C14  | 1.4967 | 109.68 | 116.91  | 107.30 | 1.5040 |
| IC | C13  | C12  | *N   | C15  | 1.4967 | 109.68 | -123.42 | 110.88 | 1.4938 |
| IC | C12  | N    | C15  | H15A | 1.5212 | 110.88 | -177.15 | 111.31 | 1.0816 |
| IC | H15A | N    | *C15 | H15B | 1.0816 | 111.31 | 118.98  | 109.44 | 1.0875 |
| IC | H15A | N    | *C15 | H15C | 1.0816 | 111.31 | -122.11 | 111.46 | 1.0818 |
| IC | C12  | N    | C14  | H14A | 1.5212 | 107.30 | -178.89 | 114.23 | 1.0739 |
| IC | H14A | N    | *C14 | H14B | 1.0739 | 114.23 | 123.44  | 110.21 | 1.0968 |
| IC | H14A | N    | *C14 | H14C | 1.0739 | 114.23 | -124.43 | 111.41 | 1.0948 |
| IC | C12  | N    | C13  | H13A | 1.5212 | 109.68 | 176.44  | 111.15 | 1.0822 |
| IC | H13A | N    | *C13 | H13B | 1.0822 | 111.15 | 121.89  | 111.75 | 1.0814 |
| IC | H13A | N    | *C13 | H13C | 1.0822 | 111.15 | -118.50 | 109.57 | 1.0892 |
| IC | C13  | N    | C12  | C11  | 1.4967 | 109.68 | -178.83 | 116.30 | 1.5392 |
| IC | C11  | N    | *C12 | H12A | 1.5392 | 116.30 | 117.04  | 108.30 | 1.0985 |
| IC | C11  | N    | *C12 | H12B | 1.5392 | 116.30 | -126.61 | 112.36 | 1.0787 |
| IC | N    | C12  | C11  | O12  | 1.5212 | 116.30 | 126.79  | 107.85 | 1.4239 |
| IC | O12  | C12  | *C11 | H11A | 1.4239 | 107.85 | 118.10  | 109.30 | 1.1131 |
| IC | O12  | C12  | *C11 | H11B | 1.4239 | 107.85 | -123.12 | 113.16 | 1.1140 |
| IC | C12  | C11  | O12  | P    | 1.5392 | 107.85 | -68.29  | 118.09 | 1.5886 |
| IC | C11  | O12  | P    | O11  | 1.4239 | 118.09 | -167.58 | 104.18 | 1.5725 |
| IC | O11  | O12  | *P   | O13  | 1.5725 | 104.18 | 116.57  | 107.05 | 1.4823 |
| IC | O11  | O12  | *P   | O14  | 1.5725 | 104.18 | -118.73 | 106.98 | 1.4805 |
| IC | O12  | P    | O11  | C1S  | 1.5886 | 104.18 | 51.85   | 121.69 | 1.4327 |
| IC | P    | O11  | C1S  | C2S  | 1.5725 | 121.69 | 103.66  | 111.21 | 1.5586 |
| IC | C2S  | O11  | *C1S | H1S  | 1.5586 | 111.21 | 118.79  | 108.35 | 1.1121 |
| IC | C2S  | O11  | *C1S | H1T  | 1.5586 | 111.21 | -123.25 | 112.85 | 1.1152 |
| IC | O11  | C1S  | C2S  | C3S  | 1.4327 | 111.21 | 175.67  | 114.25 | 1.5343 |
| IC | C3S  | C1S  | *C2S | NF   | 1.5343 | 114.25 | 120.00  | 111.52 | 1.4406 |
| IC | C3S  | C1S  | *C2S | H2S  | 1.5343 | 114.25 | -120.00 | 105.03 | 1.1194 |

|    |      |      |       |      |        |        |         |        |        |
|----|------|------|-------|------|--------|--------|---------|--------|--------|
| IC | C1S  | C2S  | NF    | C1F  | 1.5586 | 111.52 | 160.94  | 124.85 | 1.3364 |
| IC | C1F  | C2S  | *NF   | HNF  | 1.3364 | 124.85 | -157.81 | 113.39 | 1.0062 |
| IC | C1S  | C2S  | C3S   | C4S  | 1.5586 | 114.25 | -70.50  | 110.14 | 1.5009 |
| IC | C4S  | C2S  | *C3S  | O3   | 1.5009 | 110.14 | 118.36  | 109.80 | 1.4235 |
| IC | C4S  | C2S  | *C3S  | H3S  | 1.5009 | 110.14 | -121.14 | 110.10 | 1.1140 |
| IC | C2S  | C3S  | O3    | HO3  | 1.5343 | 109.80 | 46.50   | 104.54 | 0.9610 |
| IC | C2S  | C3S  | C4S   | C5S  | 1.5343 | 110.14 | -84.24  | 124.28 | 1.3444 |
| IC | C5S  | C3S  | *C4S  | H4S  | 1.3444 | 124.28 | 178.79  | 115.93 | 1.1003 |
| IC | C3S  | C4S  | C5S   | C6S  | 1.5009 | 124.28 | 179.01  | 124.77 | 1.5077 |
| IC | C6S  | C4S  | *C5S  | H5S  | 1.5077 | 124.77 | -178.18 | 119.00 | 1.1029 |
| IC | C4S  | C5S  | C6S   | C7S  | 1.3444 | 124.77 | -117.13 | 111.46 | 1.5391 |
| IC | C7S  | C5S  | *C6S  | H6S  | 1.5391 | 111.46 | 120.98  | 111.41 | 1.1142 |
| IC | C7S  | C5S  | *C6S  | H6T  | 1.5391 | 111.46 | -120.60 | 109.91 | 1.1125 |
| IC | C5S  | C6S  | C7S   | C8S  | 1.5077 | 111.46 | -179.61 | 112.41 | 1.5354 |
| IC | C8S  | C6S  | *C7S  | H7S  | 1.5354 | 112.41 | 121.26  | 109.74 | 1.1138 |
| IC | C8S  | C6S  | *C7S  | H7T  | 1.5354 | 112.41 | -120.99 | 109.40 | 1.1147 |
| IC | C6S  | C7S  | C8S   | C9S  | 1.5391 | 112.41 | -179.79 | 112.50 | 1.5345 |
| IC | C9S  | C7S  | *C8S  | H8S  | 1.5345 | 112.50 | 121.20  | 108.97 | 1.1132 |
| IC | C9S  | C7S  | *C8S  | H8T  | 1.5345 | 112.50 | -121.38 | 109.07 | 1.1129 |
| IC | C7S  | C8S  | C9S   | C10S | 1.5354 | 112.50 | -179.89 | 112.66 | 1.5344 |
| IC | C10S | C8S  | *C9S  | H9S  | 1.5344 | 112.66 | 121.49  | 109.05 | 1.1133 |
| IC | C10S | C8S  | *C9S  | H9T  | 1.5344 | 112.66 | -121.38 | 108.96 | 1.1136 |
| IC | C8S  | C9S  | C10S  | C11S | 1.5345 | 112.66 | -179.87 | 112.54 | 1.5345 |
| IC | C11S | C9S  | *C10S | H10S | 1.5345 | 112.54 | 121.27  | 109.07 | 1.1133 |
| IC | C11S | C9S  | *C10S | H10T | 1.5345 | 112.54 | -121.34 | 109.11 | 1.1132 |
| IC | C9S  | C10S | C11S  | C12S | 1.5344 | 112.54 | 179.97  | 112.61 | 1.5344 |
| IC | C12S | C10S | *C11S | H11S | 1.5344 | 112.61 | 121.36  | 109.09 | 1.1133 |
| IC | C12S | C10S | *C11S | H11T | 1.5344 | 112.61 | -121.33 | 109.07 | 1.1134 |
| IC | C10S | C11S | C12S  | C13S | 1.5345 | 112.61 | -179.96 | 112.58 | 1.5345 |
| IC | C13S | C11S | *C12S | H12S | 1.5345 | 112.58 | 121.29  | 109.12 | 1.1133 |
| IC | C13S | C11S | *C12S | H12T | 1.5345 | 112.58 | -121.31 | 109.15 | 1.1133 |
| IC | C11S | C12S | C13S  | C14S | 1.5344 | 112.58 | 179.97  | 112.58 | 1.5345 |
| IC | C14S | C12S | *C13S | H13S | 1.5345 | 112.58 | 121.30  | 109.13 | 1.1133 |
| IC | C14S | C12S | *C13S | H13T | 1.5345 | 112.58 | -121.30 | 109.13 | 1.1133 |
| IC | C12S | C13S | C14S  | C15S | 1.5345 | 112.58 | -179.99 | 112.58 | 1.5345 |
| IC | C15S | C13S | *C14S | H14S | 1.5345 | 112.58 | 121.30  | 109.12 | 1.1133 |
| IC | C15S | C13S | *C14S | H14T | 1.5345 | 112.58 | -121.31 | 109.12 | 1.1133 |
| IC | C13S | C14S | C15S  | C16S | 1.5345 | 112.58 | 180.00  | 112.58 | 1.5346 |
| IC | C16S | C14S | *C15S | H15S | 1.5346 | 112.58 | 121.30  | 109.11 | 1.1133 |
| IC | C16S | C14S | *C15S | H15T | 1.5346 | 112.58 | -121.30 | 109.11 | 1.1133 |
| IC | C14S | C15S | C16S  | C17S | 1.5345 | 112.58 | 180.00  | 112.64 | 1.5337 |
| IC | C17S | C15S | *C16S | H16S | 1.5337 | 112.64 | 121.32  | 109.14 | 1.1133 |
| IC | C17S | C15S | *C16S | H16T | 1.5337 | 112.64 | -121.32 | 109.14 | 1.1133 |
| IC | C15S | C16S | C17S  | C18S | 1.5346 | 112.64 | 180.00  | 113.23 | 1.5309 |
| IC | C18S | C16S | *C17S | H17S | 1.5309 | 113.23 | 121.67  | 108.77 | 1.1142 |
| IC | C18S | C16S | *C17S | H17T | 1.5309 | 113.23 | -121.67 | 108.77 | 1.1142 |
| IC | C16S | C17S | C18S  | H18S | 1.5337 | 113.23 | 180.00  | 110.63 | 1.1113 |
| IC | H18S | C17S | *C18S | H18T | 1.1113 | 110.63 | 120.07  | 110.47 | 1.1114 |
| IC | H18S | C17S | *C18S | H18U | 1.1113 | 110.63 | -120.07 | 110.47 | 1.1114 |
| IC | C2S  | NF   | C1F   | C2F  | 1.4406 | 124.85 | -156.83 | 114.97 | 1.4964 |
| IC | C2F  | NF   | *C1F  | OF   | 1.4964 | 114.97 | 162.54  | 122.11 | 1.2268 |
| IC | NF   | C1F  | C2F   | C3F  | 1.3364 | 114.97 | -146.57 | 111.92 | 1.5432 |
| IC | C3F  | C1F  | *C2F  | H2F  | 1.5432 | 111.92 | -120.83 | 107.93 | 1.1115 |
| IC | H2F  | C1F  | *C2F  | H2G  | 1.1115 | 107.93 | -117.30 | 109.04 | 1.1113 |
| IC | C1F  | C2F  | C3F   | C4F  | 1.4964 | 111.92 | 179.54  | 112.84 | 1.5310 |
| IC | C4F  | C2F  | *C3F  | H3F  | 1.5310 | 112.84 | -121.63 | 109.37 | 1.1145 |
| IC | H3F  | C2F  | *C3F  | H3G  | 1.1145 | 109.37 | -117.07 | 109.08 | 1.1157 |
| IC | C2F  | C3F  | C4F   | C5F  | 1.5434 | 112.23 | 174.86  | 112.58 | 1.5342 |
| IC | C5F  | C3F  | *C4F  | H4F  | 1.5342 | 112.58 | -120.18 | 108.65 | 1.1140 |
| IC | H4F  | C3F  | *C4F  | H4G  | 1.1140 | 108.65 | -117.52 | 109.62 | 1.1127 |
| IC | C3F  | C4F  | C5F   | C6F  | 1.5340 | 112.58 | -174.06 | 112.39 | 1.5340 |
| IC | C6F  | C4F  | *C5F  | H5F  | 1.5340 | 112.39 | -122.01 | 109.38 | 1.1130 |
| IC | H5F  | C4F  | *C5F  | H5G  | 1.1130 | 109.38 | -117.34 | 108.92 | 1.1134 |
| IC | C4F  | C5F  | C6F   | C7F  | 1.5342 | 112.39 | 178.27  | 112.75 | 1.5340 |
| IC | C7F  | C5F  | *C6F  | H6F  | 1.5340 | 112.75 | -120.93 | 108.96 | 1.1137 |
| IC | H6F  | C5F  | *C6F  | H6G  | 1.1137 | 108.96 | -117.41 | 109.22 | 1.1131 |
| IC | C5F  | C6F  | C7F   | C8F  | 1.5340 | 112.75 | -178.89 | 112.33 | 1.5342 |
| IC | C8F  | C6F  | *C7F  | H7F  | 1.5342 | 112.33 | -121.40 | 109.26 | 1.1132 |
| IC | H7F  | C6F  | *C7F  | H7G  | 1.1132 | 109.26 | -117.45 | 109.12 | 1.1130 |
| IC | C6F  | C7F  | C8F   | C9F  | 1.5340 | 112.33 | 179.09  | 112.77 | 1.5340 |
| IC | C9F  | C7F  | *C8F  | H8F  | 1.5340 | 112.77 | -121.23 | 109.16 | 1.1134 |





|           |      |       |   |
|-----------|------|-------|---|
| ATOM H5F  | HAL2 | 0.09  | ! |
| ATOM H5G  | HAL2 | 0.09  | ! |
| GROUP     |      |       | ! |
| ATOM C6F  | CTL2 | -0.18 | ! |
| ATOM H6F  | HAL2 | 0.09  | ! |
| ATOM H6G  | HAL2 | 0.09  | ! |
| GROUP     |      |       | ! |
| ATOM C7F  | CTL2 | -0.18 | ! |
| ATOM H7F  | HAL2 | 0.09  | ! |
| ATOM H7G  | HAL2 | 0.09  | ! |
| GROUP     |      |       | ! |
| ATOM C8F  | CTL2 | -0.18 | ! |
| ATOM H8F  | HAL2 | 0.09  | ! |
| ATOM H8G  | HAL2 | 0.09  | ! |
| GROUP     |      |       | ! |
| ATOM C9F  | CTL2 | -0.18 | ! |
| ATOM H9F  | HAL2 | 0.09  | ! |
| ATOM H9G  | HAL2 | 0.09  | ! |
| GROUP     |      |       | ! |
| ATOM C10F | CTL2 | -0.18 | ! |
| ATOM H10F | HAL2 | 0.09  | ! |
| ATOM H10G | HAL2 | 0.09  | ! |
| GROUP     |      |       | ! |
| ATOM C11F | CTL2 | -0.18 | ! |
| ATOM H11F | HAL2 | 0.09  | ! |
| ATOM H11G | HAL2 | 0.09  | ! |
| GROUP     |      |       | ! |
| ATOM C12F | CTL2 | -0.18 | ! |
| ATOM H12F | HAL2 | 0.09  | ! |
| ATOM H12G | HAL2 | 0.09  | ! |
| GROUP     |      |       | ! |
| ATOM C13F | CTL2 | -0.18 | ! |
| ATOM H13F | HAL2 | 0.09  | ! |
| ATOM H13G | HAL2 | 0.09  | ! |
| GROUP     |      |       | ! |
| ATOM C14F | CTL2 | -0.18 | ! |
| ATOM H14F | HAL2 | 0.09  | ! |
| ATOM H14G | HAL2 | 0.09  | ! |
| GROUP     |      |       | ! |
| ATOM C15F | CTL2 | -0.18 | ! |
| ATOM H15F | HAL2 | 0.09  | ! |
| ATOM H15G | HAL2 | 0.09  | ! |
| GROUP     |      |       | ! |
| ATOM C16F | CTL2 | -0.18 | ! |
| ATOM H16F | HAL2 | 0.09  | ! |
| ATOM H16G | HAL2 | 0.09  | ! |
| GROUP     |      |       | ! |
| ATOM C17F | CTL2 | -0.18 | ! |
| ATOM H17F | HAL2 | 0.09  | ! |
| ATOM H17G | HAL2 | 0.09  | ! |
| GROUP     |      |       | ! |
| ATOM C18F | CTL2 | -0.18 | ! |
| ATOM H18F | HAL2 | 0.09  | ! |
| ATOM H18G | HAL2 | 0.09  | ! |
| GROUP     |      |       | ! |
| ATOM C19F | CTL2 | -0.18 | ! |
| ATOM H19F | HAL2 | 0.09  | ! |
| ATOM H19G | HAL2 | 0.09  | ! |
| GROUP     |      |       | ! |
| ATOM C20F | CTL2 | -0.18 | ! |
| ATOM H20F | HAL2 | 0.09  | ! |
| ATOM H20G | HAL2 | 0.09  | ! |
| GROUP     |      |       | ! |
| ATOM C21F | CTL2 | -0.18 | ! |
| ATOM H21F | HAL2 | 0.09  | ! |
| ATOM H21G | HAL2 | 0.09  | ! |
| GROUP     |      |       | ! |
| ATOM C22F | CTL2 | -0.18 | ! |
| ATOM H22F | HAL2 | 0.09  | ! |
| ATOM H22G | HAL2 | 0.09  | ! |
| GROUP     |      |       | ! |

ATOM C23F CTL2 -0.18 !  
 ATOM H23F HAL2 0.09 !  
 ATOM H23G HAL2 0.09 !  
 GROUP !  
 ATOM C24F CTL3 -0.27 !  
 ATOM H24F HAL3 0.09 !  
 ATOM H24G HAL3 0.09 !  
 ATOM H24H HAL3 0.09 !

!SPHINGOSINE CHAIN

BOND C18S H18S C18S H18T C18S H18U  
 BOND C18S C17S C17S H17S C17S H17T  
 BOND C17S C16S C16S H16S C16S H16T  
 BOND C16S C15S C15S H15S C15S H15T  
 BOND C15S C14S C14S H14S C14S H14T  
 BOND C14S C13S C13S H13S C13S H13T  
 BOND C13S C12S C12S H12S C12S H12T  
 BOND C12S C11S C11S H11S C11S H11T  
 BOND C11S C10S C10S H10S C10S H10T  
 BOND C10S C9S C9S H9S C9S H9T  
 BOND C9S C8S C8S H8S C8S H8T  
 BOND C8S C7S C7S H7S C7S H7T  
 BOND C7S C6S C6S H6S C6S H6T  
 BOND C6S C5S C5S H5S C4S H4S  
 BOND C4S C3S C3S H3S C3S O3  
 BOND O3 HO3  
 BOND C3S C2S C2S H2S  
 BOND C2S C1S C1S H1S C1S H1T  
 BOND C1S O1 O1 HO1

!FATTY ACID CHAIN

BOND C2S NF NF HNF NF C1F  
 BOND C1F C2F C2F H2F C2F H2G  
 BOND C2F C3F C3F H3F C3F H3G  
 BOND C3F C4F C4F H4F C4F H4G  
 BOND C4F C5F C5F H5F C5F H5G  
 BOND C5F C6F C6F H6F C6F H6G  
 BOND C6F C7F C7F H7F C7F H7G  
 BOND C7F C8F C8F H8F C8F H8G  
 BOND C8F C9F C9F H9F C9F H9G  
 BOND C9F C10F C10F H10F C10F H10G  
 BOND C10F C11F C11F H11F C11F H11G  
 BOND C11F C12F C12F H12F C12F H12G  
 BOND C12F C13F C13F H13F C13F H13G  
 BOND C13F C14F C14F H14F C14F H14G  
 BOND C14F C15F C15F H15F C15F H15G  
 BOND C15F C16F C16F H16F C16F H16G  
 BOND C16F C17F C17F H17F C17F H17G  
 BOND C17F C18F C18F H18F C18F H18G  
 BOND C18F C19F C19F H19F C19F H19G  
 BOND C19F C20F C20F H20F C20F H20G  
 BOND C20F C21F C21F H21F C21F H21G  
 BOND C21F C22F C22F H22F C22F H22G  
 BOND C22F C23F C23F H23F C23F H23G  
 BOND C23F C24F C24F H24F C24F H24G  
 BOND C24F H24H

DOUBLE C4S C5S

DOUBLE C1F OF

IMPR C1F C2F NF OF NF C1F C2S HNF

|    |      |      |      |      |        |        |         |        |        |
|----|------|------|------|------|--------|--------|---------|--------|--------|
| IC | C18S | C17S | C16S | C15S | 1.5309 | 113.23 | 180.00  | 112.64 | 1.5346 |
| IC | C17S | C16S | C15S | C14S | 1.5337 | 112.64 | 180.00  | 112.58 | 1.5345 |
| IC | C16S | C15S | C14S | C13S | 1.5346 | 112.58 | 180.00  | 112.58 | 1.5345 |
| IC | C15S | C14S | C13S | C12S | 1.5345 | 112.58 | -179.99 | 112.58 | 1.5345 |
| IC | C14S | C13S | C12S | C11S | 1.5345 | 112.58 | 179.97  | 112.58 | 1.5344 |
| IC | C13S | C12S | C11S | C10S | 1.5345 | 112.58 | -179.96 | 112.61 | 1.5345 |
| IC | C12S | C11S | C10S | C9S  | 1.5344 | 112.61 | 179.97  | 112.54 | 1.5344 |
| IC | C11S | C10S | C9S  | C8S  | 1.5345 | 112.54 | -179.87 | 112.66 | 1.5345 |
| IC | C10S | C9S  | C8S  | C7S  | 1.5344 | 112.66 | -179.89 | 112.50 | 1.5354 |
| IC | C9S  | C8S  | C7S  | C6S  | 1.5345 | 112.50 | -179.79 | 112.41 | 1.5391 |



|    |      |      |       |      |        |        |         |        |        |
|----|------|------|-------|------|--------|--------|---------|--------|--------|
| IC | C8S  | C7S  | C6S   | C5S  | 1.5354 | 112.41 | -179.61 | 111.46 | 1.5077 |
| IC | C7S  | C6S  | C5S   | C4S  | 1.5391 | 111.46 | -117.13 | 124.77 | 1.3444 |
| IC | C6S  | C5S  | C4S   | C3S  | 1.5077 | 124.77 | 179.01  | 124.28 | 1.5009 |
| IC | C5S  | C4S  | C3S   | C2S  | 1.3444 | 124.28 | -84.24  | 110.14 | 1.5343 |
| IC | C5S  | C4S  | C3S   | O3   | 1.3444 | 124.28 | 156.07  | 107.64 | 1.4235 |
| IC | C4S  | C3S  | C2S   | C1S  | 1.5009 | 110.14 | -70.50  | 114.25 | 1.5586 |
| IC | H01  | O1   | C1S   | C2S  | 1.5725 | 121.69 | 103.66  | 111.21 | 1.5586 |
| IC | C2S  | O1   | *C1S  | H1S  | 1.5586 | 111.21 | 118.79  | 108.35 | 1.1121 |
| IC | C2S  | O1   | *C1S  | H1T  | 1.5586 | 111.21 | -123.25 | 112.85 | 1.1152 |
| IC | O1   | C1S  | C2S   | C3S  | 1.4327 | 111.21 | 175.67  | 114.25 | 1.5343 |
| IC | C3S  | C1S  | *C2S  | NF   | 1.5343 | 114.25 | 120.00  | 111.52 | 1.4406 |
| IC | C3S  | C1S  | *C2S  | H2S  | 1.5343 | 114.25 | -120.00 | 105.03 | 1.1194 |
| IC | C1S  | C2S  | NF    | C1F  | 1.5586 | 111.52 | 160.94  | 124.85 | 1.3364 |
| IC | C1F  | C2S  | *NF   | HNF  | 1.3364 | 124.85 | -157.81 | 113.39 | 1.0062 |
| IC | C1S  | C2S  | C3S   | C4S  | 1.5586 | 114.25 | -70.50  | 110.14 | 1.5009 |
| IC | C4S  | C2S  | *C3S  | O3   | 1.5009 | 110.14 | 118.36  | 109.80 | 1.4235 |
| IC | C4S  | C2S  | *C3S  | H3S  | 1.5009 | 110.14 | -121.14 | 110.10 | 1.1140 |
| IC | C2S  | C3S  | O3    | HO3  | 1.5343 | 109.80 | 46.50   | 104.54 | 0.9610 |
| IC | C2S  | C3S  | C4S   | C5S  | 1.5343 | 110.14 | -84.24  | 124.28 | 1.3444 |
| IC | C5S  | C3S  | *C4S  | H4S  | 1.3444 | 124.28 | 178.79  | 115.93 | 1.1003 |
| IC | C3S  | C4S  | C5S   | C6S  | 1.5009 | 124.28 | 179.01  | 124.77 | 1.5077 |
| IC | C6S  | C4S  | *C5S  | H5S  | 1.5077 | 124.77 | -178.18 | 119.00 | 1.1029 |
| IC | C4S  | C5S  | C6S   | C7S  | 1.3444 | 124.77 | -117.13 | 111.46 | 1.5391 |
| IC | C7S  | C5S  | *C6S  | H6S  | 1.5391 | 111.46 | 120.98  | 111.41 | 1.1142 |
| IC | C7S  | C5S  | *C6S  | H6T  | 1.5391 | 111.46 | -120.60 | 109.91 | 1.1125 |
| IC | C5S  | C6S  | C7S   | C8S  | 1.5077 | 111.46 | -179.61 | 112.41 | 1.5354 |
| IC | C8S  | C6S  | *C7S  | H7S  | 1.5354 | 112.41 | 121.26  | 109.74 | 1.1138 |
| IC | C8S  | C6S  | *C7S  | H7T  | 1.5354 | 112.41 | -120.99 | 109.40 | 1.1147 |
| IC | C6S  | C7S  | C8S   | C9S  | 1.5391 | 112.41 | -179.79 | 112.50 | 1.5345 |
| IC | C9S  | C7S  | *C8S  | H8S  | 1.5345 | 112.50 | 121.20  | 108.97 | 1.1132 |
| IC | C9S  | C7S  | *C8S  | H8T  | 1.5345 | 112.50 | -121.38 | 109.07 | 1.1129 |
| IC | C7S  | C8S  | C9S   | C10S | 1.5354 | 112.50 | -179.89 | 112.66 | 1.5344 |
| IC | C10S | C8S  | *C9S  | H9S  | 1.5344 | 112.66 | 121.49  | 109.05 | 1.1133 |
| IC | C10S | C8S  | *C9S  | H9T  | 1.5344 | 112.66 | -121.38 | 108.96 | 1.1136 |
| IC | C8S  | C9S  | C10S  | C11S | 1.5345 | 112.66 | -179.87 | 112.54 | 1.5345 |
| IC | C11S | C9S  | *C10S | H10S | 1.5345 | 112.54 | 121.27  | 109.07 | 1.1133 |
| IC | C11S | C9S  | *C10S | H10T | 1.5345 | 112.54 | -121.34 | 109.11 | 1.1132 |
| IC | C9S  | C10S | C11S  | C12S | 1.5344 | 112.54 | 179.97  | 112.61 | 1.5344 |
| IC | C12S | C10S | *C11S | H11S | 1.5344 | 112.61 | 121.36  | 109.09 | 1.1133 |
| IC | C12S | C10S | *C11S | H11T | 1.5344 | 112.61 | -121.33 | 109.07 | 1.1134 |
| IC | C10S | C11S | C12S  | C13S | 1.5345 | 112.61 | -179.96 | 112.58 | 1.5345 |
| IC | C13S | C11S | *C12S | H12S | 1.5345 | 112.58 | 121.29  | 109.12 | 1.1133 |
| IC | C13S | C11S | *C12S | H12T | 1.5345 | 112.58 | -121.31 | 109.15 | 1.1133 |
| IC | C11S | C12S | C13S  | C14S | 1.5344 | 112.58 | 179.97  | 112.58 | 1.5345 |
| IC | C14S | C12S | *C13S | H13S | 1.5345 | 112.58 | 121.30  | 109.13 | 1.1133 |
| IC | C14S | C12S | *C13S | H13T | 1.5345 | 112.58 | -121.30 | 109.13 | 1.1133 |
| IC | C12S | C13S | C14S  | C15S | 1.5345 | 112.58 | -179.99 | 112.58 | 1.5345 |
| IC | C15S | C13S | *C14S | H14S | 1.5345 | 112.58 | 121.30  | 109.12 | 1.1133 |
| IC | C15S | C13S | *C14S | H14T | 1.5345 | 112.58 | -121.31 | 109.12 | 1.1133 |
| IC | C13S | C14S | C15S  | C16S | 1.5345 | 112.58 | 180.00  | 112.58 | 1.5346 |
| IC | C16S | C14S | *C15S | H15S | 1.5346 | 112.58 | 121.30  | 109.11 | 1.1133 |
| IC | C16S | C14S | *C15S | H15T | 1.5346 | 112.58 | -121.30 | 109.11 | 1.1133 |
| IC | C14S | C15S | C16S  | C17S | 1.5345 | 112.58 | 180.00  | 112.64 | 1.5337 |
| IC | C17S | C15S | *C16S | H16S | 1.5337 | 112.64 | 121.32  | 109.14 | 1.1133 |
| IC | C17S | C15S | *C16S | H16T | 1.5337 | 112.64 | -121.32 | 109.14 | 1.1133 |
| IC | C15S | C16S | C17S  | C18S | 1.5346 | 112.64 | 180.00  | 113.23 | 1.5309 |
| IC | C18S | C16S | *C17S | H17S | 1.5309 | 113.23 | 121.67  | 108.77 | 1.1142 |
| IC | C18S | C16S | *C17S | H17T | 1.5309 | 113.23 | -121.67 | 108.77 | 1.1142 |
| IC | C16S | C17S | C18S  | H18S | 1.5337 | 113.23 | 180.00  | 110.63 | 1.1113 |
| IC | H18S | C17S | *C18S | H18T | 1.1113 | 110.63 | 120.07  | 110.47 | 1.1114 |
| IC | H18S | C17S | *C18S | H18U | 1.1113 | 110.63 | -120.07 | 110.47 | 1.1114 |
| IC | C2S  | NF   | C1F   | C2F  | 1.4406 | 124.85 | -156.83 | 114.97 | 1.4964 |
| IC | C2F  | NF   | *C1F  | OF   | 1.4964 | 114.97 | 162.54  | 122.11 | 1.2268 |
| IC | NF   | C1F  | C2F   | C3F  | 1.3364 | 114.97 | -146.57 | 111.92 | 1.5432 |
| IC | C3F  | C1F  | *C2F  | H2F  | 1.5432 | 111.92 | -120.83 | 107.93 | 1.1115 |
| IC | H2F  | C1F  | *C2F  | H2G  | 1.1115 | 107.93 | -117.30 | 109.04 | 1.1113 |
| IC | C1F  | C2F  | C3F   | C4F  | 1.4964 | 111.92 | 179.54  | 112.84 | 1.5310 |
| IC | C4F  | C2F  | *C3F  | H3F  | 1.5310 | 112.84 | -121.63 | 109.37 | 1.1145 |
| IC | H3F  | C2F  | *C3F  | H3G  | 1.1145 | 109.37 | -117.07 | 109.08 | 1.1157 |
| IC | C2F  | C3F  | C4F   | C5F  | 1.5434 | 112.23 | 174.86  | 112.58 | 1.5342 |
| IC | C5F  | C3F  | *C4F  | H4F  | 1.5342 | 112.23 | -120.18 | 108.65 | 1.1140 |

|    |      |      |       |      |        |        |         |        |        |
|----|------|------|-------|------|--------|--------|---------|--------|--------|
| IC | H4F  | C3F  | *C4F  | H4G  | 1.1140 | 108.65 | -117.52 | 109.62 | 1.1127 |
| IC | C3F  | C4F  | C5F   | C6F  | 1.5340 | 112.58 | -174.06 | 112.39 | 1.5340 |
| IC | C6F  | C4F  | *C5F  | H5F  | 1.5340 | 112.39 | -122.01 | 109.38 | 1.1130 |
| IC | H5F  | C4F  | *C5F  | H5G  | 1.1130 | 109.38 | -117.34 | 108.92 | 1.1134 |
| IC | C4F  | C5F  | C6F   | C7F  | 1.5342 | 112.39 | 178.27  | 112.75 | 1.5340 |
| IC | C7F  | C5F  | *C6F  | H6F  | 1.5340 | 112.75 | -120.93 | 108.96 | 1.1137 |
| IC | H6F  | C5F  | *C6F  | H6G  | 1.1137 | 108.96 | -117.41 | 109.22 | 1.1131 |
| IC | C5F  | C6F  | C7F   | C8F  | 1.5340 | 112.75 | -178.89 | 112.33 | 1.5342 |
| IC | C8F  | C6F  | *C7F  | H7F  | 1.5342 | 112.33 | -121.40 | 109.26 | 1.1132 |
| IC | H7F  | C6F  | *C7F  | H7G  | 1.1132 | 109.26 | -117.45 | 109.12 | 1.1130 |
| IC | C6F  | C7F  | C8F   | C9F  | 1.5340 | 112.33 | 179.09  | 112.77 | 1.5340 |
| IC | C9F  | C7F  | *C8F  | H8F  | 1.5340 | 112.77 | -121.23 | 109.16 | 1.1134 |
| IC | H8F  | C7F  | *C8F  | H8G  | 1.1134 | 109.16 | -117.38 | 109.08 | 1.1133 |
| IC | C7F  | C8F  | C9F   | C10F | 1.5342 | 112.77 | 179.02  | 112.34 | 1.5343 |
| IC | C10F | C8F  | *C9F  | H9F  | 1.5343 | 112.34 | -121.27 | 109.27 | 1.1132 |
| IC | H9F  | C8F  | *C9F  | H9G  | 1.1132 | 109.27 | -117.45 | 109.10 | 1.1130 |
| IC | C8F  | C9F  | C10F  | C11F | 1.5340 | 112.34 | 178.16  | 112.74 | 1.5340 |
| IC | C11F | C9F  | *C10F | H10F | 1.5340 | 112.74 | -121.18 | 109.16 | 1.1134 |
| IC | H10F | C9F  | *C10F | H10G | 1.1134 | 109.16 | -117.35 | 109.10 | 1.1132 |
| IC | C9F  | C10F | C11F  | C12F | 1.5343 | 112.74 | 178.91  | 112.38 | 1.5343 |
| IC | C12F | C10F | *C11F | H11F | 1.5343 | 112.38 | -121.39 | 109.34 | 1.1131 |
| IC | H11F | C10F | *C11F | H11G | 1.1131 | 109.34 | -117.43 | 108.98 | 1.1132 |
| IC | C10F | C11F | C12F  | C13F | 1.5340 | 112.38 | 176.93  | 112.68 | 1.5340 |
| IC | C13F | C11F | *C12F | H12F | 1.5340 | 112.68 | -121.02 | 109.05 | 1.1134 |
| IC | H12F | C11F | *C12F | H12G | 1.1134 | 109.05 | -117.34 | 109.20 | 1.1131 |
| IC | C11F | C12F | C13F  | C14F | 1.5343 | 112.68 | -179.93 | 112.45 | 1.5345 |
| IC | C14F | C12F | *C13F | H13F | 1.5345 | 112.45 | -121.60 | 109.42 | 1.1129 |
| IC | H13F | C12F | *C13F | H13G | 1.1129 | 109.42 | -117.40 | 108.85 | 1.1134 |
| IC | C12F | C13F | C14F  | C15F | 1.5340 | 112.45 | 175.93  | 112.68 | 1.5334 |
| IC | C15F | C13F | *C14F | H14F | 1.5334 | 112.68 | -121.00 | 109.06 | 1.1131 |
| IC | H14F | C13F | *C14F | H14G | 1.1131 | 109.06 | -117.24 | 109.28 | 1.1130 |
| IC | C13F | C14F | C15F  | C16F | 1.5345 | 112.68 | -178.23 | 113.16 | 1.5306 |
| IC | C16F | C14F | *C15F | H15F | 1.5306 | 113.16 | -121.86 | 108.84 | 1.1140 |
| IC | H15F | C14F | *C15F | H15G | 1.1140 | 108.84 | -116.70 | 108.76 | 1.1144 |
| IC | C14F | C15F | C16F  | C17F | 1.5345 | 112.68 | -178.23 | 113.16 | 1.5306 |
| IC | C17F | C15F | *C16F | H16F | 1.5306 | 113.16 | -121.86 | 108.84 | 1.1140 |
| IC | H16F | C15F | *C16F | H16G | 1.1140 | 108.84 | -116.70 | 108.76 | 1.1144 |
| IC | C15F | C16F | C17F  | C18F | 1.5345 | 112.68 | -178.23 | 113.16 | 1.5306 |
| IC | C18F | C16F | *C17F | H17F | 1.5306 | 113.16 | -121.86 | 108.84 | 1.1140 |
| IC | H17F | C16F | *C17F | H17G | 1.1140 | 108.84 | -116.70 | 108.76 | 1.1144 |
| IC | C16F | C17F | C18F  | C19F | 1.5345 | 112.68 | -178.23 | 113.16 | 1.5306 |
| IC | C19F | C17F | *C18F | H18F | 1.5306 | 113.16 | -121.86 | 108.84 | 1.1140 |
| IC | H18F | C17F | *C18F | H18G | 1.1140 | 108.84 | -116.70 | 108.76 | 1.1144 |
| IC | C17F | C18F | C19F  | C20F | 1.5344 | 112.57 | 179.80  | 112.59 | 1.5346 |
| IC | C20F | C18F | *C19F | H19F | 1.5346 | 112.59 | -121.28 | 109.10 | 1.1133 |
| IC | H19F | C18F | *C19F | H19G | 1.1133 | 109.10 | -117.38 | 109.12 | 1.1133 |
| IC | C18F | C19F | C20F  | C21F | 1.5345 | 112.59 | -179.89 | 112.63 | 1.5337 |
| IC | C21F | C19F | *C20F | H20F | 1.5337 | 112.63 | -121.33 | 109.16 | 1.1133 |
| IC | H20F | C19F | *C20F | H20G | 1.1133 | 109.16 | -117.38 | 109.14 | 1.1133 |
| IC | C19F | C20F | C21F  | C22F | 1.5346 | 112.63 | 179.93  | 113.24 | 1.5309 |
| IC | C22F | C20F | *C21F | H21F | 1.5309 | 113.24 | -121.66 | 108.77 | 1.1142 |
| IC | H21F | C20F | *C21F | H21G | 1.1142 | 108.77 | -116.65 | 108.78 | 1.1142 |
| IC | C20F | C21F | C22F  | C23F | 1.5346 | 112.63 | 179.93  | 113.24 | 1.5309 |
| IC | C23F | C21F | *C22F | H22F | 1.5309 | 113.24 | -121.66 | 108.77 | 1.1142 |
| IC | H22F | C21F | *C22F | H22G | 1.1142 | 108.77 | -116.65 | 108.78 | 1.1142 |
| IC | C21F | C22F | C23F  | C24F | 1.5346 | 112.63 | 179.93  | 113.24 | 1.5309 |
| IC | C24F | C22F | *C23F | H23F | 1.5309 | 113.24 | -121.66 | 108.77 | 1.1142 |
| IC | H23F | C22F | *C23F | H23G | 1.1142 | 108.77 | -116.65 | 108.78 | 1.1142 |
| IC | C22F | C23F | C24F  | H24F | 1.5337 | 113.24 | -59.91  | 110.47 | 1.1114 |
| IC | H24F | C23F | *C24F | H24G | 1.1114 | 110.47 | 119.87  | 110.48 | 1.1113 |
| IC | H24F | C23F | *C24F | H24H | 1.1114 | 110.47 | -120.06 | 110.63 | 1.1113 |

PATCH FIRST NONE LAST NONE

end

read para card flex @app

\* new parameters

\*

ATOMS

MASS 165 NHL 14.00700 !N !

MASS 166 CTO1 12.01100 !C !  
 MASS 167 CEL3 12.01100 !C !  
 MASS 168 CTO2 12.01100 !C !

BONDS  
 !  
 !V(bond) = Kb(b - b0)\*\*2  
 !  
 !Kb: kcal/mole/A\*\*2  
 !b0: A  
 !  
 !atom type Kb b0  
 ! Cyclopropane Moeity Addition  
 !

! Ceramides  
 ! CC  
 CTL1 CEL3 250.000 1.490 ! prot22; Ala Dipeptide ab initio calc's (LK) fixed from 10/90 (5/91); CT1-C  
 CTO1 CEL3 250.000 1.490 ! prot22; Ala Dipeptide ab initio calc's (LK) fixed from 10/90 (5/91) ; CT1-C  
 CTO1 CTL1 222.500 1.500 ! lip36; alkanes, 3/92; CTL1-CTL1  
 CTO1 CTL3 222.500 1.538 ! lip36; alkanes, 3/92; CTL1-CTL3  
 CEL3 CTL2 365.000 1.502 ! lip36; butene; from propene, yin,adm jr., 12/95; CEL1-CTL2  
 CEL3 CEL3 440.000 1.340 ! lip36; butene, yin,adm jr., 12/95; CEL1-CEL1  
 CTL2 C 250.000 1.490 ! prot22; Ala Dipeptide ab initio calc's (LK) fixed from 10/90 (5/91); CT2-C  
 CTL3 C 250.000 1.490 ! prot22; Ala Dipeptide ab initio calc's (LK) fixed from 10/90 (5/91); CT3-C  
 CTO1 OHL 428.000 1.420 ! lip36; glycerol; OHL-CTL1  
 CTO1 OSL 340.000 1.430 ! lipid ester; rmv nov 2009  
 CTO1 HAL1 309.000 1.111 ! lip36; alkanes, 3/92; CTL1-HAL1  
 HEL1 CEL3 360.500 1.100 ! lip36; propene, yin,adm jr., 12/95; HEL1-CEL1  
 NHL H 440.000 0.997 ! prot22; Alanine Dipeptide ab initio calc's (LK); NHL-H  
 NHL CTL3 320.000 1.430 ! prot22; NMA Gas & Liquid Phase IR Spectra (LK); NHL-CT3  
 NHL C 370.000 1.345 ! prot22; Alanine Dipeptide ab initio calc's (LK); NHL-C  
 NHL CTL1 320.000 1.430 ! prot22; NMA Gas & Liquid Phase IR Spectra (LK); NHL-CT1  
 CTO2 HAL2 309.000 1.111 ! lip36; alkanes, 4/98  
 CTO2 CTL1 222.500 1.538 ! lip36; alkanes, 3/92  
 CTO2 OHL 428.000 1.420 ! glycerol

ANGLES  
 !  
 !V(angle) = Ktheta(Theta - Theta0)\*\*2  
 !  
 !V(Urey-Bradley) = Kub(S - S0)\*\*2  
 !  
 !Ktheta: kcal/mole/rad\*\*2  
 !Theta0: degrees  
 !Kub: kcal/mole/A\*\*2 (Urey-Bradley)  
 !S0: A  
 !  
 !atom types Ktheta Theta0 Kub S0  
 ! Ceramides  
 !CCC  
 CTL3 CTL1 CEL3 52.000 108.00 ! prot22; Alanine Dipeptide ab initio calc's (LK); CT3-CT1-C  
 CTL3 CTO1 CEL3 52.000 108.00 ! prot22; Alanine Dipeptide ab initio calc's (LK); CT3-CT1-C  
 CTL1 CEL3 CEL3 48.00 123.50 ! lip36; 2-butene,from 2-butene, yin,adm jr., 12/95; CEL1-CEL1-CTL2  
 CTO1 CEL3 CEL3 48.00 123.50 ! lip36; 2-butene,from 2-butene, yin,adm jr., 12/95; CEL1-CEL1-CTL2  
 CTL1 CTL1 CEL3 52.000 108.00 ! prot22; Alanine Dipeptide ab initio calc's (LK); CT1 CT1 C  
 CTL1 CTO1 CEL3 52.000 108.00 ! prot22; Alanine Dipeptide ab initio calc's (LK); CT1 CT1 C  
 C CTL2 CTL2 52.000 108.00 ! prot22; Alanine Dipeptide ab initio calc's (LK); CT3-CT1-C  
 CTL2 CTL1 CTO1 58.350 113.50 11.16 2.561 ! lip36; glycerol; CTL1-CTL1-CTL2  
 CEL3 CEL3 CTL2 48.000 123.50 ! lip36; 2-butene,from 2-butene, yin,adm jr., 12/95; CEL1-CEL1-CTL2  
 CEL3 CTL2 CTL3 32.00 112.20 ! lip36; 1-butene; from propene, yin,adm jr., 12/95; CEL1-CTL2-CTL3  
 CEL3 CTL2 CTL2 32.00 112.20 ! lip36; 1-butene; from propene, yin,adm jr., 12/95; CEL1-CTL2-CTL2  
 CTL3 CTL2 C 52.000 108.00 ! prot22; Alanine Dipeptide ab initio calc's (LK); CT3-CT1-C  
 OHL CTL1 CEL3 75.700 110.10 ! prot22; MeOH, EMB, 10/10/89; OHL-CT1-CT1  
 OHL CTO1 CEL3 75.700 110.10 ! prot22; MeOH, EMB, 10/10/89; OHL-CT1-CT1  
 OHL CTL1 CTL3 75.700 110.10 ! prot22; MeOH, EMB, 10/10/89; OHL CT1 CT3  
 OHL CTO1 CTL3 75.700 110.10 ! prot22; MeOH, EMB, 10/10/89; OHL CT1 CT3  
 OHL CTO1 CTL1 75.700 110.10 ! prot22; MeOH, EMB, 10/10/89; OHL CT1 CT1  
 O C CTL2 80.000 121.00 ! prot22; Alanine Dipeptide ab initio calc's (LK); O-C-CT2

|      |      |      |        |        |                                                                     |         |                                                                                  |
|------|------|------|--------|--------|---------------------------------------------------------------------|---------|----------------------------------------------------------------------------------|
| O    | C    | CTL3 | 80.000 | 121.00 | ! prot22; Alanine Dipeptide ab initio calc's (LK); O C CT3          |         |                                                                                  |
| OSL  | CTO1 | CTL1 | 75.700 | 110.10 | ! analog for acetyl at sphingosine O3; rmv nov 2009                 |         |                                                                                  |
| OSL  | CTO1 | CEL3 | 75.700 | 110.10 | ! analog for acetyl at sphingosine O3; rmv nov 2009                 |         |                                                                                  |
| CL   | OSL  | CTO1 | 40.00  | 109.60 | 30.0                                                                | 2.2651  | ! analog for acetyl at sphingosine O3; rmv nov 2009                              |
| CTL1 | CEL3 | HEL1 | 40.00  | 116.00 | ! lip36; 1-butene, from propene, yin.adm jr., 12/95; HEL1-CEL1-CTL2 |         |                                                                                  |
| CTO1 | CEL3 | HEL1 | 40.00  | 116.00 | ! lip36; 1-butene, from propene, yin.adm jr., 12/95; HEL1-CEL1-CTL2 |         |                                                                                  |
| HAL1 | CTL1 | CEL3 | 33.000 | 109.50 | 30.00                                                               | 2.16300 | ! prot22; alanine dipeptide, LK, replaced, adm jr., 5/09/91; HA-CTL1-C (Protein) |
| HAL1 | CTO1 | CEL3 | 33.000 | 109.50 | 30.00                                                               | 2.16300 | ! prot22; alanine dipeptide, LK, replaced, adm jr., 5/09/91; HA-CTL1-C (Protein) |
| HAL1 | CTO1 | CTL3 | 34.500 | 110.10 | 22.53                                                               | 2.179   | ! lip36; alkane, 3/92; HAL1-CTL1-CTL3                                            |
| HAL1 | CTO1 | CTL1 | 34.500 | 110.10 | 22.53                                                               | 2.179   | ! lip36; alkane, 3/92; HAL1-CTL1-CTL1                                            |
| HAL1 | CTL1 | CTO1 | 34.500 | 110.10 | 22.53                                                               | 2.179   | ! lip36; alkane, 3/92; HAL1-CTL1-CTL1                                            |
| HAL3 | CTL3 | CTO1 | 33.430 | 110.10 | 22.53                                                               | 2.179   | ! lip36; alkane, 4/98; HAL3-CTL3-CTL                                             |
| HEL1 | CEL3 | CEL3 | 52.00  | 119.50 | ! lip36; 2-butene, yin,adm jr., 12/95; HEL1-CEL1-CEL1               |         |                                                                                  |
| HEL1 | CEL3 | CTL2 | 40.00  | 116.00 | ! lip36; 1-butene; from propene, yin,adm jr., 12/95; HEL1-CEL1-CTL2 |         |                                                                                  |
| CEL3 | CTL2 | HAL2 | 45.00  | 111.50 | ! lip36; 1-butene; from propene, yin,adm jr., 12/95; HAL2-CTL2-CEL1 |         |                                                                                  |
| HAL2 | CTL2 | C    | 33.000 | 109.50 | 30.00                                                               | 2.16300 | ! prot22; alanine dipeptide, LK, replaced, adm jr., 5/09/91; HA-CT2-C            |
| HAL3 | CTL3 | C    | 33.000 | 109.50 | 30.00                                                               | 2.16300 | ! prot22; alanine dipeptide, LK, replaced, adm jr., 5/09/91; C CT3 HA            |
| NHL  | CTL1 | OSL  | 80.000 | 122.50 | ! prot22; NMA Vib Modes (LK); O-C-NH1                               |         |                                                                                  |
| O    | C    | NHL  | 80.000 | 122.50 | ! prot22; NMA Vib Modes (LK); O-C-NH1                               |         |                                                                                  |
| HOL  | OHL  | CTO1 | 57.500 | 106.00 | ! lip36; glycerol; HOL-OHL-CTL1                                     |         |                                                                                  |
| OHL  | CTO1 | HAL1 | 45.900 | 108.89 | ! lip36; glycerol; OHL-CTL1-HAL1                                    |         |                                                                                  |
| OSL  | CTO1 | HAL1 | 45.900 | 108.89 | ! lip36; glycerol; OHL-CTL1-HAL1; rmv nov 2009                      |         |                                                                                  |
| NHL  | CTL1 | CTO1 | 70.000 | 113.50 | ! prot22; Alanine Dipeptide ab initio calc's (LK); NHL-CT1-CT1      |         |                                                                                  |
| NHL  | C    | CTL2 | 80.000 | 116.50 | ! prot22; NMA Vib Modes (LK); NHL-C-CT2                             |         |                                                                                  |
| NHL  | CTL1 | CTL2 | 70.000 | 113.50 | ! prot22; Alanine Dipeptide ab initio calc's (LK); NHL-CT1-CT2      |         |                                                                                  |
| NHL  | CTL1 | CTL3 | 70.000 | 113.50 | ! prot22;                                                           |         |                                                                                  |
| NHL  | CTL1 | CTL1 | 70.000 | 113.50 | ! prot22; Alanine Dipeptide ab initio calc's (LK); NHL-CT1-CT1      |         |                                                                                  |
| NHL  | C    | CTL3 | 80.000 | 116.50 | ! prot22; NMA Vib Modes (LK); NHL-C-CT3                             |         |                                                                                  |
| H    | NHL  | CTL3 | 35.000 | 117.00 | ! prot22; NMA Vibrational Modes (LK); H-NH1-CT3                     |         |                                                                                  |
| H    | NHL  | C    | 34.000 | 123.00 | ! prot22; NMA Vib Modes (LK); H-NH1-C                               |         |                                                                                  |
| H    | NHL  | CTL1 | 35.000 | 117.00 | ! prot22; NMA Vibrational Modes (LK); H-NH1-CT1                     |         |                                                                                  |
| CTL3 | NHL  | C    | 50.000 | 120.00 | ! prot22; NMA Vib Modes (LK); CT3-NH1-C                             |         |                                                                                  |
| CTL1 | NHL  | C    | 50.000 | 120.00 | ! prot22; NMA Vib Modes (LK); CT1 NH1 C                             |         |                                                                                  |
| NHL  | CTL3 | HAL3 | 51.500 | 109.50 | ! prot22; NMA crystal (JCS); NHL-CT3-HA                             |         |                                                                                  |
| NHL  | CTL1 | HAL1 | 48.000 | 108.00 | ! prot22; Alanine Dipeptide ab initio calc's (LK); NHL-CT1-HB       |         |                                                                                  |
| HOL  | OHL  | CTO2 | 57.500 | 106.00 | ! lip36; glycerol; HOL-OHL-CTL2                                     |         |                                                                                  |
| OHL  | CTO2 | HAL2 | 45.900 | 108.89 | ! lip36; glycerol; OHL-CTL2-HAL1                                    |         |                                                                                  |
| HAL2 | CTO2 | CTL1 | 26.500 | 110.10 | 22.53                                                               | 2.179   | ! lip36; alkane, 4/98; HAL2-CTL2-CTL1                                            |
| HAL1 | CTL1 | CTO2 | 34.500 | 110.10 | 22.53                                                               | 2.179   | ! lip36; alkane, 3/92; HAL1-CTL1-CTL2                                            |
| NHL  | CTL1 | CTO2 | 70.000 | 113.50 | ! prot22; Alanine Dipeptide ab initio calc's(LK);NHL-CT1-CTO2       |         |                                                                                  |
| CTO2 | CTL1 | CTO1 | 58.350 | 113.50 | 11.16                                                               | 2.561   | ! lip36; glycerol; CTL1-CTL1-CTL2                                                |
| HAL2 | CTO2 | HAL2 | 35.500 | 109.00 | 5.40                                                                | 1.80200 | ! alkane, 3/92 HAL2-CLT2-HAL2                                                    |
| OHL  | CTO2 | CTL1 | 75.700 | 110.10 | ! prot22; MeOH, EMB, 10/10/89; OH1 CT2 CT2                          |         |                                                                                  |

!  
DIHEDRALS  
!  
!V(dihedral) = Kchi(1 + cos(n(chi) - delta))  
!  
!Kchi: kcal/mole  
!n: multiplicity  
!delta: degrees  
!  
!atom types                      Kchi      n      delta

! Ceramides  
!CCCC  
CTL3 CTL1 CEL3 CEL3      0.9000    1    180.00 ! lip36; 2-pentene and 3-heptene; CEL1 CEL1 CTL2 CTL3  
CEL3 CEL3 CTL2 CTL3      0.9100    1    180.00 ! lip36; 2-hexene, adm jr., 11/09  
CEL3 CEL3 CTL2 CTL3      0.1800    2    180.00 !  
CEL3 CEL3 CTL2 CTL3      0.1700    3    180.00 ! "  
CEL3 CEL3 CTL2 CTL2      0.9100    1    180.00 ! lip36; 2-hexene, adm jr., 11/09  
CEL3 CEL3 CTL2 CTL2      0.1800    2    180.00 !  
CEL3 CEL3 CTL2 CTL2      0.1700    3    180.00 ! "  
CTL1 CEL3 CEL3 CTL2      0.4500    1    180.00 ! lip36; 2-butene, adm jr., 4/04; X CEL1 CEL1 X  
CTL1 CEL3 CEL3 CTL2      8.5000    2    180.00 ! lip36; 2-butene, adm jr., 4/04; X CEL1 CEL1 X

|                     |        |   |        |   |                                                                      |
|---------------------|--------|---|--------|---|----------------------------------------------------------------------|
| CTO1 CEL3 CEL3 CTL2 | 0.1500 | 1 | 0.00   | ! | prot27; 2-butene, adm jr., 2/00 update; X CEL1 CEL1 X                |
| CTO1 CEL3 CEL3 CTL2 | 8.5000 | 2 | 180.00 | ! | prot27; 2-butene, adm jr., 2/00 update; X CEL1 CEL1 X                |
| CTL1 CTL1 CEL3 CEL3 | 0.6000 | 1 | 180.00 | ! | lip36; 2-hexene; CEL1 CEL1 CTL2 CTL2                                 |
| !CCCO               |        |   |        |   |                                                                      |
| O C CTL2 CTL3       | 1.400  | 1 | 0.00   | ! | prot22; lactams, adm jr; O C CT2 CT2/O C CT1 CT3                     |
| O C CTL2 CTL2       | 1.400  | 1 | 0.00   | ! | prot22; lactams, adm jr; O C CT2 CT2/O C CT1 CT3                     |
| OHL CTL1 CEL3 CEL3  | 0.600  | 1 | 180.00 | ! | lip36; 2-hexene; CEL3 CEL3 CTL2 CTL2                                 |
| OSL CTO1 CEL3 CEL3  | 1.280  | 1 | 180.0  | ! | torsfit MP2/ccpVTZ, cer1 model, erh 8/09                             |
| OSL CTO1 CEL3 CEL3  | 0.560  | 2 | 180.0  | ! | " analogy fot TACSPH, rmv nov 2009                                   |
| OSL CTO1 CEL3 CEL3  | 0.860  | 3 | 0.0    | ! | "                                                                    |
| CTL2 CTL1 CTO1 OHL  | 0.200  | 3 | 0.00   | ! | lip36; alkane, 3/92, X CTL1 CTL1 X                                   |
| CTO1 CTL1 CTL2 OSL  | 0.390  | 1 | 180.00 | ! | torsfit MP2/ccpVTZ, sph model, erh 8/09; transferred from cer4       |
| CTO1 CTL1 CTL2 OSL  | 0.510  | 2 | 180.00 | ! | "                                                                    |
| CTO1 CTL1 CTL2 OSL  | 0.870  | 3 | 180.00 | ! | "                                                                    |
| CTL2 CTL1 CTO1 OSL  | 0.390  | 1 | 180.00 | ! | torsfit MP2/ccpVTZ, sph model, erh 8/09; transferred from cer4       |
| CTL2 CTL1 CTO1 OSL  | 0.510  | 2 | 180.00 | ! | " analogy for TACSPH, rmv nov 2009                                   |
| CTL2 CTL1 CTO1 OSL  | 0.870  | 3 | 180.00 | ! | "                                                                    |
| !HCOH               |        |   |        |   |                                                                      |
| HAL1 CTO1 OHL HOL   | 0.140  | 3 | 0.00   | ! | lip36; glycerol, X CTL1 OHL X                                        |
| !COCC               |        |   |        |   |                                                                      |
| CL OSL CTO1 CTL1    | 0.000  | 4 | 0.00   | ! | glycerol, beta1 6/07; from lip36 for TACSPH, rmv nov 2009            |
| CL OSL CTO1 CTL1    | 0.150  | 3 | 180.00 | ! | glycerol, beta1 6/07                                                 |
| CL OSL CTO1 CTL1    | 1.453  | 2 | 180.00 | ! | glycerol, beta1 6/07                                                 |
| CL OSL CTO1 CTL1    | 0.837  | 1 | 180.00 | ! | glycerol, beta1 6/07                                                 |
| CEL3 CTO1 OSL CL    | 0.220  | 1 | 0.00   | ! | og OMeTHP compounds 2 and 3; rmv nov 2009                            |
| CEL3 CTO1 OSL CL    | 0.280  | 2 | 180.00 | ! | " MCSA fit                                                           |
| CEL3 CTO1 OSL CL    | 0.890  | 3 | 0.00   | ! | " MP2/cc-pVTZ//MP2/6-31G*                                            |
| !COCH               |        |   |        |   |                                                                      |
| HAL1 CTO1 OSL CL    | 0.00   | 3 | 0.00   | ! | lip36, X CT1 OSL X; TACCSPH, rmv nov 2009                            |
| !CCCH               |        |   |        |   |                                                                      |
| HEL1 CEL3 CTL1 CTL3 | 0.1200 | 3 | 0.00   | ! | prot22; for butene, yin/adm jr., 12/95; HE1 CE1 CT2 CT3              |
| HEL1 CEL3 CTO1 CTL3 | 0.1200 | 3 | 0.00   | ! | prot22; for butene, yin/adm jr., 12/95; HE1 CE1 CT2 CT3              |
| HEL1 CEL3 CTL2 CTL2 | 0.1200 | 3 | 0.00   | ! | prot22; for butene, yin/adm jr., 12/95; HE1 CE1 CT2 CT3              |
| HAL1 CTL1 CEL3 CEL3 | 0.0300 | 3 | 0.00   | ! | prot22;for butene, yin/adm jr., 12/95; CE1 CE1 CT3 HA                |
| HAL1 CTO1 CEL3 CEL3 | 0.0300 | 3 | 0.00   | ! | prot22;for butene, yin/adm jr., 12/95; CE1 CE1 CT3 HA                |
| CTL1 CTL1 CEL3 HEL1 | 0.1200 | 3 | 0.00   | ! | lip36; butene, yin, adm. jr; CTL2 CTL2 CEL1 HEL1                     |
| HAL1 CTL3 CTO1 CEL3 | 0.2000 | 3 | 0.00   | ! | lip36; alkane, 3/92; X CTL1 CTL3 X                                   |
| CTL2 CTL1 CTO1 HAL1 | 0.200  | 3 | 0.00   | ! | lip36; alkane, 3/92; X CTL1 CTL3 X                                   |
| CTL1 CTO1 CEL3 HEL1 | 0.1200 | 3 | 0.00   | ! | lip36 butene, yin, adm. jr; CTL2 CTL2 CEL1 HEL1                      |
| HAL1 CTL1 CTO1 CEL3 | 0.200  | 3 | 0.00   | ! | lip36; alkane, 3/92; X CTL1 CTL3 X                                   |
| CTO1 CEL3 CEL3 HEL1 | 0.1500 | 1 | 180.00 | ! | lip36; 2-butene, adm jr., 2/00 update; X CEL1 CEL1 X                 |
| CTO1 CEL3 CEL3 HEL1 | 8.5000 | 2 | 180.00 | ! | lip36; 2-butene, adm jr., 2/00 update; X CEL1 CEL1 X                 |
| CEL3 CEL3 CTL2 HAL2 | 0.3000 | 3 | 180.00 | ! | lip36; 2-butene, adm jr., 4/04; CEL1 CEL1 CTL2 HAL2                  |
| HEL1 CEL3 CEL3 CTL2 | 0.1500 | 1 | 180.00 | ! | lip36; 2-butene, adm jr., 2/00 update; X CEL1 CEL1 X                 |
| HEL1 CEL3 CEL3 CTL2 | 8.5000 | 2 | 180.00 | ! | lip36; 2-butene, adm jr., 2/00 update; X CEL1 CEL1 X                 |
| HEL1 CEL3 CTL2 CTL3 | 0.1200 | 3 | 0.00   | ! | lip36; butene, yin,adm jr., 12/95; HEL1 CEL1 CTL2 CTL3               |
| !HCCH               |        |   |        |   |                                                                      |
| HEL1 CEL3 CTL1 HAL1 | 0.000  | 3 | 0.00   | ! | prot22; butene, adm jr., 2/00 update; HE1 CE1 CT2 HA                 |
| HEL1 CEL3 CTO1 HAL1 | 0.000  | 3 | 0.00   | ! | prot22; butene, adm jr., 2/00 update; HE1 CE1 CT2 HA                 |
| HAL3 CTL3 CTO1 HAL1 | 0.200  | 3 | 0.00   | ! | lip36; alkane, 3/92; X CTL1 CTL3 X                                   |
| HAL1 CTL1 CTO1 HAL1 | 0.200  | 3 | 0.00   | ! | lip36; alkane, 3/92; X CTL1 CTL1 X                                   |
| HEL1 CEL3 CEL3 HEL1 | 1.000  | 2 | 180.00 | ! | lip36; 2-butene, adm jr., 8/98 update; HEL1 CEL1 CEL1 HEL1           |
| HEL1 CEL3 CTL2 HAL2 | 0.000  | 3 | 0.00   | ! | lip36; butene, adm jr., 2/00 update; HEL1 CEL1 CTL2 HAL2             |
| !OCCH               |        |   |        |   |                                                                      |
| OHL CTL1 CEL3 HEL1  | 0.120  | 3 | 180.00 | ! | lip36; butene, yin, adm jr., 12/95; HEL1 CEL1 CTL1 CTL3              |
| OHL CTO1 CEL3 HEL1  | 0.120  | 3 | 180.00 | ! | lip36; butene, yin, adm jr., 12/95; HEL1 CEL1 CTL1 CTL3              |
| OSL CTO1 CEL3 HEL1  | 0.120  | 3 | 180.00 | ! | lip36; butene, yin, adm jr., 12/95; HEL1 CEL1 CTL1 CTL3 rmv nov 2009 |
| O C CTL2 HAL2       | 0.000  | 3 | 180.00 | ! | prot22; adm jr., 8/13/90 acetamide geometry and vibrations; O C      |
| O C CTL3 HAL3       | 0.000  | 3 | 180.00 | ! | prot22; adm jr., 8/13/90 acetamide geometry and vibrations; O C      |
| HAL3 CTL3 CTO1 OHL  | 0.200  | 3 | 0.00   | ! | lip36; alkane, 3/92; X CTL1 CTL3 X                                   |
| HAL1 CTL1 CTO1 OHL  | 0.200  | 3 | 0.00   | ! | lip36; alkane, 3/92; X CTL1 CTL1 X                                   |
| HAL1 CTL1 CTO1 OSL  | 0.200  | 3 | 0.00   | ! | lip36; alkane, 3/92; X CTL1 CTL1 X; rmv nov 2009                     |
| !NCCC               |        |   |        |   |                                                                      |
| NHL CTL1 CTL1 CTL3  | 0.260  | 1 | 180.00 | ! | torsfit MP2/ccpVTZ, cer3 model, erh 8/09                             |
| NHL CTL1 CTL1 CTL3  | 0.390  | 2 | 180.00 | ! | "                                                                    |
| NHL CTL1 CTL1 CTL3  | 0.120  | 3 | 180.00 | ! | "                                                                    |
| !NCCH               |        |   |        |   |                                                                      |

```

NHL C CTL2 HAL2 0.000 3 0.00 ! prot22; LK for autogenerate dihe, sp2-methyl, no dihedral
potential; NH1 C CT2 HA
NHL C CTL3 HAL3 0.000 3 0.00 ! prot22; LK for autogenerate dihe, sp2-methyl, no dihedral
potential; NH1 C CT3 HA
NHL CTL1 CTO1 HAL1 0.200 3 0.00 ! lip36; alkane, 3/92; X CTL1 CTL1 X
!HNCH
HAL3 CTL3 NHL H 0.000 3 0.00 ! prot22; LK for autogenerate dihe, sp2-methyl, no dihedral
potential; HA CT3 NH1 H
HAL1 CTL1 NHL H 0.000 1 0.00 ! prot22; Alanine Dipeptide ab initio calc's (LK); HB CT1 NH1 H
!OCNH HNCC for NMA/CERN cis/trans barrier
H NHL C O 0.530 1 0.00 ! fit to cern QM profile, jbk 10/12
H NHL C O 1.270 2 180.00 ! fit to cern QM profile, jbk 10/12
H NHL C O 0.140 3 0.00 ! fit to cern QM profile, jbk 10/12
H NHL C O 0.780 4 0.00 ! fit to cern QM profile, jbk 10/12
H NHL C CTL2 2.500 2 180.00 ! prot22; Gives appropriate NMA cis/trans barrier. (LK); H NH1 C
CT2
H NHL CTL1 CTL2 0.000 1 0.00 ! prot22; Alanine Dipeptide ab initio calc's (LK); H NH1 CT1 CT2
H NHL CTL1 CTL1 0.000 1 0.00 ! prot22; Alanine Dipeptide ab initio calc's (LK); H NH1 CT1 CT1
H NHL C CTL3 2.500 2 180.00 ! prot22; Gives appropriate NMA cis/trans barrier. (LK); H NH1 C
CT3
H NHL CTL1 CTL3 2.500 2 180.00 ! prot22;
H NHL CTL1 CTO1 0.000 1 0.00 ! prot22; Alanine Dipeptide ab initio calc's (LK); H NH1 CT1 CT1
!OCNC
O C NHL CTL3 2.500 2 180.00 ! prot22; Gives appropriate NMA cis/trans barrier. (LK); O C NH1
CT3
O C NHL CTL1 2.500 2 180.00 ! prot22; Gives appropriate NMA cis/trans barrier. (LK); O C NH1
CT1
!CCNC
CTL1 NHL C CTL2 0.000 1 0.00 ! set to zero in fits
CTL1 NHL C CTL3 0.000 1 0.00 ! set to zero in fits
! torsion 4 and OH torsion
CTL2 C NHL CTL3 1.600 1 0.00 ! prot22; from CT2 C NH1 CT2, adm jr. 10/21/96; CT2 C NH1 CT3
CTL3 C NHL CTL3 1.600 1 0.00 ! prot22; from CT2 C NH1 CT2, adm jr. 10/21/96; CT2 C NH1 CT3
CTL1 CTL1 NHL C 0.000 1 0.00 ! set to zero in fit
CTL2 CTL1 NHL C 0.000 1 0.00 ! set to zero in fit
CTL3 CTL1 NHL C 0.000 1 0.00 ! set to zero in fit
C NHL CTL1 CTO1 4.080 1 0.00 ! torsion fit to cer6 qm, jbk 10/12
C NHL CTL1 CTO1 1.560 2 180.00 ! torsion fit to cer6 qm, jbk 10/12
C NHL CTL1 CTO1 1.800 3 0.00 ! torsion fit to cer6 qm, jbk 10/12
CTL1 CTO1 OHL HOL 5.000 1 180.00 ! torsion fit to cer6 qm, jbk 10/12
CTL1 CTO1 OHL HOL 0.220 2 0.00 ! torsion fit to cer6 qm, jbk 10/12
CTL1 CTO1 OHL HOL 1.110 3 180.00 ! torsion fit to cer6 qm, jbk 10/12
HOL OHL CTL1 CEL3 1.330 1 0.00 ! prot22; 2-propanol OH hf/6-3lg* torsional surface, adm jr.,
3/2/93; H OH1 CT1 CT1
HOL OHL CTO1 CEL3 1.330 1 0.00 ! prot22; 2-propanol OH hf/6-3lg* torsional surface, adm jr.,
3/2/93; H OH1 CT1 CT1
HOL OHL CTO1 CTL3 0.000 3 0.00 ! torsion fit to cer6 qm, jbk 9/12
!HCNC
HAL3 CTL3 NHL C 0.000 3 0.00 ! prot22; LK for autogenerate dihe, sp2-methyl, no dihedral
potential; HA CT3 NH1 C
HAL1 CTL1 NHL C 0.000 1 0.00 ! prot22; Alanine Dipeptide ab initio calc's (LK); HB CT1 NH1 C
!NCCO
NHL CTL1 CTL2 OSL 1.630 1 180.00 ! torsfit MP2/ccpVTZ, cer3 model, erh 8/09; transferred
NHL CTL1 CTL2 OSL 0.490 2 0.00 ! ""
NHL CTL1 CTL2 OSL 0.570 3 0.00 ! ""
NHL CTL1 CTO1 OSL 1.630 1 180.00 ! torsfit MP2/ccpVTZ, cer3 model, erh 8/09; transferred
NHL CTL1 CTO1 OSL 0.490 2 0.00 ! "" analogy for TACSPH, rmv nov 2009
NHL CTL1 CTO1 OSL 0.570 3 0.00 ! ""
!OPOC
OSL PL OSL CTL2 1.200 1 180.00 ! lip36; phosphate, new NA, 4/98, adm jr.
OSL PL OSL CTL2 0.100 2 180.00 ! lip36; phosphate, new NA, 4/98, adm jr.
OSL PL OSL CTL2 0.100 3 180.00 ! lip36; phosphate, new NA, 4/98, adm jr.
!torsion1
CEL3 CTO1 CTL1 NHL 0.940 1 0.00 ! torfit to cer4 qm, jbk 5/13
CEL3 CTO1 CTL1 NHL 0.880 2 180.00 ! torfit to cer4 qm, jbk 5/13
CEL3 CTO1 CTL1 NHL 2.090 3 0.00 ! torfit to cer4 qm, jbk 5/13
NHL CTL1 CTO1 OHL 0.420 1 0.00 ! torfit to cer4 qm, jbk 5/13
NHL CTL1 CTO1 OHL 1.530 2 180.00 ! torfit to cer4 qm, jbk 5/13
NHL CTL1 CTO1 OHL 1.580 3 180.00 ! torfit to cer4 qm, jbk 5/13
CEL3 CTO1 CTL1 CTL2 0.000 1 0.00 ! torfit to cer4 qm, jbk 10/12
!torsion2

```

```

CEL3 CEL3 CTO1 CTL1    0.860  1    0.00 ! torfit to cer4 qm w/adj, jbk 5/13
CEL3 CEL3 CTO1 CTL1    1.910  2    0.00 ! torfit to cer4 qm w/adj, jbk 5/13
CEL3 CEL3 CTO1 CTL1    1.520  3   180.00 ! torfit to cer4 qm w/adj, jbk 5/13
CEL3 CEL3 CTO1 OHL     1.380  1   180.00 ! torfit to cer4 qm w/adj, jbk 5/13
CEL3 CEL3 CTO1 OHL     0.580  2    0.00 ! torfit to cer4 qm w/adj, jbk 5/13
CEL3 CEL3 CTO1 OHL     1.030  3    0.00 ! torfit to cer4 qm w/adj, jbk 5/13
!torsion3
NHL  CTL1 CTL2 OSLP    1.370  1    0.00 ! torfit to cer3 qm, jbk 5/13
NHL  CTL1 CTL2 OSLP    0.340  2    0.00 ! torfit to cer3 qm, jbk 5/13
NHL  CTL1 CTL2 OSLP    0.200  3   180.00 ! torfit to cer3 qm, jbk 5/13
NHL  CTL1 CTL2 OSLP    0.020  4   180.00 ! torfit to cer3 qm, jbk 5/13
NHL  CTL1 CTL2 OSLP    0.140  5    0.00 ! torfit to cer3 qm, jbk 5/13
NHL  CTL1 CTL2 OSLP    0.060  6    0.00 ! torfit to cer3 qm, jbk 5/13
CTL1 CTL1 CTL2 OSLP    0.000  1    0.00 ! torfit to cer3 qm, jbk 5/13
!torsion5
CTL3 CTL2 C   NHL     1.990  1    0.00 ! torfit to cer2 qm, jbk 10/12
CTL3 CTL2 C   NHL     0.640  2   180.00 ! torfit to cer2 qm, jbk 10/12
CTL3 CTL2 C   NHL     0.280  3   180.00 ! torfit to cer2 qm, jbk 10/12
CTL2 CTL2 C   NHL     1.990  1    0.00 ! torfit to cer2 qm, jbk 10/12
CTL2 CTL2 C   NHL     0.640  2   180.00 ! torfit to cer2 qm, jbk 10/12
CTL2 CTL2 C   NHL     0.280  3   180.00 ! torfit to cer2 qm, jbk 10/12
X    CTL1 CTO1 X       0.200  3    0.00 ! alkane, 3/92
X    CTO1 CTL3 X       0.200  3    0.00 ! alkane, 3/92
!Added by STN for CER24, 3/13
NHL  CTL1 CTO2 OHL     0.550  1    0.00 ! jbk; NHL CTL1 CTO1 OHL
NHL  CTL1 CTO2 OHL     1.630  2   180.00 ! jbk; NHL CTL1 CTO1 OHL
NHL  CTL1 CTO2 OHL     1.430  3   180.00 ! jbk; NHL CTL1 CTO1 OHL
C    NHL CTL1 CTO2     4.080  1    0.00 ! jbk; C   NHL CTL1 CTO1
C    NHL CTL1 CTO2     1.560  2   180.00 ! jbk; C   NHL CTL1 CTO1
C    NHL CTL1 CTO2     1.800  3    0.00 ! jbk; C   NHL CTL1 CTO1
X    CTL1 CTO2 X       0.200  3    0.00 ! alkane, 3/92; X CTL1 CTL2 X
X    CTO2 OHL X        0.140  3    0.00 ! glycerol; X CTL2 OHL X
CTO2 CTL1 CTO1 OHL     0.200  3    0.00 ! lip36; alkane, 3/92, X CTL1 CTL1 X
H    NHL CTL1 CTO2     0.000  1    0.00 ! prot22; Alanine Dipeptide ab initio calc's (LK); H NHL CT1 CT2
CEL3 CTO1 CTL1 CTO2     0.000  1    0.00 ! torfit to cer4 qm, jbk 10/12

```

```

!
IMPROPER
!
!V(improper) = Kpsi(psi - psi0)**2
!
!Kpsi: kcal/mole/rad**2
!psi0: degrees
!note that the second column of numbers (0) is ignored
!
!atom types          Kpsi          psi0
!
! Ceramides
NHL X X H           20.          0          0.00 ! amide, from peptide; rmv nov 2009

```

```

NONBONDED nbxmod 5 atom cdiel shift vatom vdistance vswitch -
cutnb 14.0 ctofnb 12.0 ctonnb 10.0 eps 1.0 el4fac 1.0 wmin 1.5
!adm jr., 5/08/91, suggested cutoff scheme
!
!V(Lennard-Jones) = Eps,i,j[(Rmin,i,j/ri,j)**12 - 2(Rmin,i,j/ri,j)**6]
!
!epsilon: kcal/mole, Eps,i,j = sqrt(eps,i * eps,j)
!Rmin/2: A, Rmin,i,j = Rmin/2,i + Rmin/2,j
!
!atom ignored      epsilon      Rmin/2      ignored      eps,1-4      Rmin/2,1-4
! Ceramides
NHL      0.0          -0.2000     1.850 0.0 -0.20 1.55 ! ALLOW   PEP POL ARO
! This 1,4 vdW allows the C5 dipeptide minimum to exist.(LK) - TAKEN FROM NH1
CTO1     0.0          -0.0200     2.275 0.0 -0.01 1.9 ! alkane, 3/92
! Transferred from CTL1; lip36
CEL3     0.0          -0.0680     2.090 ! alkene, yin,adm jr., 12/95
! Transferred from CEL1; lip36! Added my STN for CER24
CTO2     0.0          -0.0560     2.010 0.0 -0.01 1.9 ! STN, 3/13

```

end  
return
